# Supplementary material for: Genetic Basis of Variation in Rice Seed Storage Protein (Albumin, Globulin, Prolamin, and Glutelin) Content Revealed by Genome-Wide Association Analysis
Source: Front Plant Sci. 2018 May 9;9:612. doi: 10.3389/fpls.2018.00612 (PMC5954490; doi:10.3389/fpls.2018.00612)
Supplement: Supplementary file 1 [file Table_1.xlsx]

## Sheet: Sheet1
Supplementary Table S1 The list of collected 527 rice varieties.
ID	Name	Original producing area	Latitude	Longitude	Clean bases (Gb)	Sequencing depth	Base quality ³20 (%)	Mapping rate (%)	Subpopulation component						Subpopulation (sequence-based)	2014EZ (Env. 1)					2015WH (Env. 2)
									IndI	IndII	Aus	VI	TrJ	TeJ		Alb (mg/g)	Glo (mg/g)	Pro (mg/g)	Glu (mg/g)	Total (mg/g)	Alb (mg/g)	Glo (mg/g)	Pro (mg/g)	Glu (mg/g)	Total (mg/g)
C001	Sadu-cho	Philippines	14.6	121	1.02	2.7	96.9	92.75	0.857453	0.141676	1e-05	1e-05	0.000841	1e-05	IndI	2.40735	6.8511	4.29099	65.4316	78.9811	3.20209	5.31674	1.7755	30.3615	40.6558
C002	Dom Sufid	Philippines	14.6	121	1.14	3.1	96.8	94.85	1e-05	1e-05	1e-05	0.99995	1e-05	1e-05	VI	2.84513	6.06414	2.49903	54.4029	65.8112	3.52122	5.57995	2.54851	52.4439	64.0936
C003	Gerdeh	Iran	35.45	51.3	1.14	3.1	96.9	96.83	1e-05	1e-05	1e-05	0.34929	1e-05	0.65067	Jap						3.00648	6.50747	2.11765	48.6462	60.2778
C004	Li-Jiang-Xin-Tuan-Hei-Gu	China	39.54	116.28	1.15	3.1	97	97.49	1e-05	1e-05	1e-05	1e-05	0.081729	0.918231	TeJ						2.56394	4.53196	1.3264	35.3587	43.781
C005	AZUCENA	Philippines	14.6	121	1.14	3.1	97	95.94	1e-05	1e-05	1e-05	1e-05	0.99995	1e-05	TrJ						3.67561	6.28464	1.82934	43.1368	54.9264
C006	Shan-Huang Zhan-2-1	China	39.54	116.28	1.17	3.1	95.5	92.7	0.33417	0.66579	1e-05	1e-05	1e-05	1e-05	Ind						3.17293	4.27106	1.56526	41.4397	50.4489
C007	Shan-Huang Zhan-2-2	India	28.6	77.2	1.14	3.1	96.9	92.79	0.326868	0.673092	1e-05	1e-05	1e-05	1e-05	Ind	2.00464	4.94258	1.96502	49.6139	58.5262	3.21017	4.51328	0.897341	44.9813	53.6021
C008	Swarna	Guinea	9.3	-13.43	1.14	3.1	96.8	92.47	0.171266	0.819718	0.008986	1e-05	1e-05	1e-05	IndII						4.87401	5.78942	2.88069	54.1027	67.6468
C009	MOROBEREKAN	United States	38.54	-77.02	1.15	3.1	97.1	92.81	0.349235	0.650725	1e-05	1e-05	1e-05	1e-05	Ind						2.61157	4.81058	0.895662	26.1581	34.4759
C010	CYPRESS	Philippines	14.6	121	1.12	3	96.9	96.02	1e-05	0.035328	1e-05	0.000686	0.963956	1e-05	TrJ	2.36635	6.79245	1.48311	54.5425	65.1844	4.12792	6.50408	2.69925	50.4641	63.7954
C011	MILYANG 23	Taiwan	25.03	121.31	1.14	3.1	97	93.62	1e-05	0.913241	1e-05	1e-05	1e-05	0.086719	IndII	3.53117	4.1062	1.88646	56.8665	66.3904	2.56984	7.03167	3.43124	52.6923	65.7251
C012	Tainong67	Philippines	14.6	121	1.14	3.1	96.8	98.52	1e-05	0.017017	1e-05	1e-05	1e-05	0.982943	TeJ	4.16748	5.37903	3.0346	60.0488	72.6299	3.50294	4.74127	2.52128	57.0484	67.8139
C013	N 22	Philippines	14.6	121	1.14	3.1	97	92.88	1e-05	1e-05	0.99995	1e-05	1e-05	1e-05	Aus	3.79176	5.86871	2.47422	73.5147	85.6494	3.7794	6.07109	1.17594	36.4786	47.505
C014	M202	India	28.6	77.2	1.05	2.8	95.5	96.7	0.018985	0.031682	1e-05	1.1e-05	0.329779	0.619534	Jap						3.59868	6.15354	1.46857	49.6716	60.8924
C015	Dular	Heilongjiang	45.45	126.41	1.11	3	95.5	92.82	1e-05	1e-05	0.99995	1e-05	1e-05	1e-05	Aus	3.25861	5.94381	5.22313	77.608	92.0336	1.75566	5.22321	3.20278	46.3449	56.5266
C016	Laoguangtou83	Heilongjiang	45.45	126.41	1.19	3.2	95.4	98.25	1e-05	1e-05	1e-05	1e-05	1e-05	0.99995	TeJ							5.66566	2.09621	37.5086
C017	AnnongwangengB-1	Anhui	37.51	117.18	1.1	3	95.4	97.6	1e-05	1e-05	1e-05	1e-05	0.079584	0.920376	TeJ	2.31638	6.29618	1.22264	48.7383	58.5735		5.02342	2.02424	44.0306
C018	AnnongwangengB-2	Zhejiang	30.14	120.09	1.1	2.9	95.1	98.27	1e-05	1e-05	1e-05	1e-05	1e-05	0.99995	TeJ							5.61031	2.39131	55.9098
C019	Ajiaonante	Guangdong	23.08	113.15	1.11	3	95.5	92.89	0.99995	1e-05	1e-05	1e-05	1e-05	1e-05	IndI							5.97931	1.93942	52.4516
C020	Guangluai-4-1	Hunan	28.11	113	1.11	3	95.7	93.04	0.99995	1e-05	1e-05	1e-05	1e-05	1e-05	IndI	2.3958	6.8058	1.94557	72.7203	83.8675		6.06002	1.37271	56.6269
C021	xiangaizao10	Unknown	NA	NA	1.11	3	95.7	92.98	0.846942	0.153013	1e-05	1e-05	1.5e-05	1e-05	IndI	2.29098	5.66583	4.78583	73.4771	86.2197		5.56134	3.44892	51.0896
C022	JinnanteB	Hunan	28.11	113	1.11	3	95.6	92.76	0.883292	0.11077	1e-05	1e-05	1e-05	0.005908	IndI	3.11025	6.84528	1.98859	58.4791	70.4232		5.5742	2.03303	56.6901
C023	Funingzipi	Hebei	38.02	114.28	1.11	3	95.7	97.21	1e-05	1e-05	1e-05	1e-05	0.092111	0.907849	TeJ	3.23465	5.8438	1.77466	55.5799	66.4331	3.89065	6.0033	1.54229	60.1727	71.6089
C024	zhenshan97B-1	Jiangxi	28.41	115.52	1	2.7	95.3	93.07	0.955691	1e-05	1e-05	1e-05	1.6e-05	0.044263	IndI						3.53181	6.02913	2.18668	61.1264	72.874
C025	Qingsiai16B	Guangdong	23.08	113.15	1.12	3	95.9	92.58	0.255736	0.73126	1e-05	1e-05	0.012974	1e-05	IndII	4.04274	5.1188	4.06808	75.4409	88.6705	4.3327	6.51294	2.76124	46.1831	59.79
C026	Weiguo	Liaoning	41.5	123.24	1.02	2.7	96	98.6	1e-05	1e-05	1e-05	1e-05	1e-05	0.99995	TeJ						3.43399	5.66492	1.01843	44.1387	54.2561
C027	Dianrui409B	Yunnan	25.04	102.41	1.12	3	96.1	92.55	0.339931	0.623015	0.004508	0.011596	0.020941	1e-05	Ind	2.22114	4.99358	1.31813	52.4989	61.0317	2.83671	5.34793	1.61563	46.7146	56.5149
C028	Liaogeng287	Liaoning	41.5	123.24	1.15	3.1	96	98.38	1e-05	1e-05	1e-05	0.006885	0.03151	0.961575	TeJ	2.48115	5.41284	2.2259	40.2557	50.3755	3.9026	6.43644	2.5948
C029	Huhui628	Unknown	NA	NA	1.12	3	96.1	96.64	0.020436	0.044517	1e-05	0.030648	0.352318	0.55207	Jap						3.65648	5.72003	1.6839	54.9938	66.0542
C030	88B-1	Jiangsu	32.02	118.5	1.11	3	95.8	92.64	0.350617	0.64331	0.002486	1e-05	1e-05	0.003566	Ind	3.05538	5.26025	1.25354	42.7672	52.3363	4.7622	5.27955	1.68754	39.2554	50.9847
C031	88B-2	Hunan	28.11	113	1.11	3	95.8	92.73	0.599137	0.400823	1e-05	1e-05	1e-05	1e-05	Ind	3.14518	5.37858	0.827999	51.9313	61.283	4.14158	4.50837	1.35072	43.34	53.3407
C032	Longhuamaohu	Hebei	38.02	114.28	1.11	3	95.8	97.48	1.3e-05	1e-05	1e-05	1e-05	1e-05	0.999947	TeJ							5.88306	0.421687	60.2968
C033	Lucaihao	Fujian	26.05	119.18	1.12	3	95.9	92.69	0.999939	1.4e-05	1e-05	1.7e-05	1e-05	1e-05	IndI	3.68487	5.51867	1.30634	71.1229	81.6327	3.40262	5.2318	0.460754	44.855	53.9502
C034	Zhonglouyihao1	Shanxi	37.52	112.34	1.09	2.9	95.4	97.65	1e-05	1e-05	1e-05	1e-05	1.6e-05	0.999944	TeJ	2.48589	6.45558	3.09363	54.7651	66.8002	3.46343	6.50382	1.74129	43.4748	55.1833
C035	Yelicanghua	Hebei	38.02	114.28	1.11	3	95.8	97.57	1e-05	1e-05	1e-05	1e-05	0.013382	0.986578	TeJ						3.83898	5.64917	1.41729	63.8563	74.7618
C036	Shufeng101	Sichuan	30.39	104.05	1.01	2.7	95.5	92.31	0.684321	0.273504	0.042146	1e-05	1e-05	1e-05	IndI	2.13379	5.24923	2.73818	34.4153	44.5365	4.05598	3.86176	1.77475	41.394	51.0865
C037	Chengduai3hao	Sichuan	30.39	104.05	1.11	3	95.6	92.57	0.99995	1e-05	1e-05	1e-05	1e-05	1e-05	IndI	2.19897	7.34396	1.09424	58.9101	69.5473	3.54162	3.83664	0.203571	45.8091	53.3909
C038	Sankecui	Hunan	28.11	113	1.13	3	95.9	92.31	0.662377	0.337583	1e-05	1e-05	1e-05	1e-05	Ind	2.58404	6.3009	2.66387	57.738	69.2868	4.01986	5.75198	6.10407	50.4706	66.3466
C039	Gongju73	Yunnan	25.04	102.41	1.11	3	95.6	92.72	0.99995	1e-05	1e-05	1e-05	1e-05	1e-05	IndI	2.20041	5.8366	0.233778	55.9831	64.2539	3.54643	3.05283		41.1946
C040	Jiabala	Xizang	29.41	91.1	1.11	3	95.6	92.71	0.999931	1e-05	1e-05	1.8e-05	1.3e-05	1.9e-05	IndI	2.38366	5.30021	0.657556	58.263	66.6045	2.79264	5.83205	0.0960382	33.7185	42.4392
C041	Taishannuo	Guangdong	23.08	113.15	1.11	3	95.6	92.37	0.873955	0.125998	1e-05	1.1e-05	1.3e-05	1.2e-05	IndI	2.94146	5.68923	0.598811	54.5761	63.8056	5.00312	4.45178	0.718727	44.7207	54.8943
C042	Guichao2hao	Guangdong	23.08	113.15	1.12	3	95.8	92.69	0.552179	0.447781	1e-05	1e-05	1e-05	1e-05	Ind	2.54967	6.04215	0.873631	58.5725	68.038	3.50499	3.26511	0.672373	25.1958	32.6383
C043	Huke3hao	Shanghai	31.14	121.29	1.12	3	95.8	92.75	0.688537	0.311423	1e-05	1e-05	1.1e-05	1e-05	Ind	2.07468	5.9298	0.575604	52.8131	61.3932	1.73901	6.38791	1.25911	46.1257	55.5117
C044	Teqingxuanhui	Unknown	NA	NA	1.12	3	95.9	92.75	0.116375	0.824434	0.016064	0.003405	0.002861	0.036861	IndII	2.05998	6.13042	2.99794	49.6203	60.8086	2.28284	4.57016	1.78541	41.9308	50.5692
C045	Huangsiguizhan	Guangdong	23.08	113.15	1.12	3	95.8	92.48	0.179305	0.820655	1e-05	1e-05	1e-05	1e-05	IndII	2.91842	3.64058	3.40715	53.4357	63.4019	4.39897	4.59354	3.3618	42.758	55.1123
C046	Xiangwanxian3hao	Hunan	28.11	113	1.12	3	95.4	92.63	0.316675	0.67455	0.004606	1e-05	1e-05	0.004149	Ind	2.9473	4.14393	3.30575	65.0694	75.4664	3.95434	5.16419	1.67955	42.9449	53.7429
C047	Hanmadao-2	Taiwan	25.03	121.31	1.11	3	95.4	92.68	0.999948	1.2e-05	1e-05	1e-05	1e-05	1e-05	IndI	2.6824	4.65054	1.24966	56.2884	64.871	2.54182	4.35828	0.588052	44.3706	51.8588
C048	Zaoshunonghu6	Hunan	28.11	113	1.1	3	95.2	98.29	1e-05	1e-05	1e-05	1e-05	1.4e-05	0.999946	TeJ	3.05983	5.95066	2.19752	54.395	65.603	2.80776	4.9236	1.42399	41.1638	50.3191
C049	Jinyou1hao	Fujian	26.05	119.18	1.11	3	95.8	92.55	0.280461	0.686189	1e-05	1e-05	0.03332	1e-05	IndII	1.14417	5.82847	0.666322	50.849	58.488	1.84158	5.27646		42.7411
C050	Chengnongshuijing	Sichuan	30.39	104.05	1.05	2.8	95	92.73	0.016149	0.964157	1e-05	1e-05	0.019664	1e-05	IndII	2.18628	5.18751	0.686462	49.9261	57.9864	3.48066	5.60831	1.23292	40.9272	51.2491
C051	PeiC122	Unknown	NA	NA	1.1	3	95.2	95.59	0.00312	0.39339	1e-05	1e-05	0.009375	0.594095	Admix	4.5725	5.16929	1.96088	62.7285	74.4311	3.37816	6.55601	1.83338	39.8874	51.655
C052	Guihuahuang	Jiangsu	32.02	118.5	1.11	3	95.4	98.34	1e-05	1e-05	1e-05	1e-05	1.3e-05	0.999947	TeJ						3.27409	5.37298	1.5694	43.0353	53.2518
C053	Momi	Guangxi	22.48	108.2	1.11	3	95.5	92.6	0.285339	0.665941	0.006888	1e-05	0.022966	0.018856	Ind	3.681	6.39599	3.46134	61.546	75.0843	4.0989	5.45781	1.59065	48.0567	59.2041
C054	Xiushui115	Zhejiang	30.14	120.09	1.09	2.9	95.4	98.03	0.017261	0.012528	1e-05	1e-05	1.8e-05	0.970173	TeJ	2.84326	4.28474	1.35859	41.3387	49.8253	3.98473	5.92857	3.00678	48.2688	61.1889
C055	Sanbaili	Hunan	28.11	113	1.12	3	95.6	93.19	0.956554	0.043406	1e-05	1e-05	1e-05	1e-05	IndI							6.12004	1.11863	48.6549
C056	Jindao1hao	Shanxi	37.52	112.34	1.12	3	95.7	98.73	1e-05	1.8e-05	1e-05	1e-05	0.02617	0.973782	TeJ						4.51364	5.61844	1.77612	58.117	70.0252
C057	Dandongludao	Liaoning	41.5	123.24	1.12	3	95.6	97.03	1e-05	1e-05	1e-05	1.1e-05	0.349015	0.650944	Jap	4.92403	7.20142	1.82097	73.4204	87.3668	4.00374	2.86525	1.08277	34.4121	42.3639
C058	Liusha1hao	Guangxi	22.48	108.2	1.12	3	95.7	92.86	0.99995	1e-05	1e-05	1e-05	1e-05	1e-05	IndI	2.09075	5.28384	0.0529346	61.4305	68.858	3.0375	6.99303	0.301256	41.7966	52.1284
C059	Bawangbian1	Hubei	30	114	1.12	3	95.6	92.88	0.999946	1e-05	1e-05	1.4e-05	1.1e-05	1e-05	IndI	1.93186	5.70665	0.331173	60.2514	68.2211	2.99593	4.6718	0.542596	49.6544	57.8647
C060	Dongtingwanxian	Hunan	28.11	113	1.11	3	95.5	92.72	0.826765	0.173189	1e-05	1.4e-05	1.1e-05	1e-05	IndI						1.46112	5.10592	2.28678	35.7432	44.597
C061	Yangdao2hao	Jiangsu	32.02	118.5	1.11	3	95.5	92.5	0.144014	0.855946	1e-05	1e-05	1e-05	1e-05	IndII	3.53297	5.44771	2.90784	64.2981	76.1867	2.8674	6.48738	1.93734	33.1469	44.4391
C062	WH62	Henan	34.48	113.42	1.11	3	95.6	92.88	0.778603	0.209619	1e-05	1e-05	0.005561	0.006197	IndI	1.70735	5.67429	0.470302	54.6796	62.5316	3.20042	5.2274	0.670552	40.571	49.6693
C063	Geng87-304	Hunan	28.11	113	1.12	3	95.8	98.34	1e-05	0.007594	1e-05	1e-05	1e-05	0.992366	TeJ	4.1731	6.30698	1.77781	55.1588	67.4167	2.65482	5.49227	0.939203	33.5024	42.5887
C064	Sugeng2hao	Jiangsu	32.02	118.5	1.12	3	95.7	98.2	1.2e-05	1.9e-05	1e-05	1e-05	1e-05	0.999939	TeJ	4.89493	6.85712	2.56393	56.9352	71.2512	3.39558	6.10914	2.12015	43.1269	54.7518
C065	Hongwan1hao	Fujian	26.05	119.18	1.11	3	95.6	92.56	0.496719	0.502191	1e-05	1.7e-05	1e-05	0.001053	Ind						3.58447	3.96771	2.63737	44.8128	55.0024
C066	Liushizao	Sichuan	30.39	104.05	1.12	3	95.7	93.02	0.834493	0.163197	1e-05	1e-05	1e-05	0.00228	IndI	1.97001	6.78158	2.99151	45.5006	57.2437	3.394	4.6993	2.80782	50.1634	61.0645
C067	Muxiqiu	Jiangsu	32.02	118.5	1.12	3	95.7	97.92	1e-05	1e-05	1e-05	1e-05	1e-05	0.99995	TeJ	2.06063	6.22407	1.16242	48.5251	57.9722	2.86394	4.66067		40.3819
C068	Taizhongxianxuan2	Taiwan	25.03	121.31	1.11	3	95.6	92.56	1e-05	0.992216	0.007744	1e-05	1e-05	1e-05	IndII	2.1352	5.57967	2.84595	47.2545	57.8153	2.59565	5.23769	2.55397	40.1789	50.5662
C069	Dangyu5hao	Anhui	37.51	117.18	1.13	3	96.1	92.63	1.5e-05	0.999945	1e-05	1e-05	1e-05	1e-05	IndII	2.74343	4.46409	1.66262	49.7668	58.637	3.53705	5.87109	1.21058	32.3537	42.9724
C070	Youmangzaojing	Jiangsu	32.02	118.5	1.12	3	95.8	98.52	1e-05	1e-05	1e-05	1e-05	1e-05	0.99995	TeJ	2.3715	7.48363	2.18871	53.4022	65.446	3.90496	6.98025		46.837
C071	Laohuzhong	Shanghai	30.4	120.5	1.13	3	96.1	97.81	1e-05	1e-05	1e-05	1e-05	1e-05	0.99995	TeJ	2.82496	5.27032	0.474298	38.3508	46.9204	2.48346	6.87411	0.787638	33.6673	43.8125
C072	Nantehao	Jiangxi	28.41	115.52	1.11	3	95.7	92.86	0.99995	1e-05	1e-05	1e-05	1e-05	1e-05	IndI	1.91859	7.22864	2.63382	69.019	80.8001	3.33088	1.53029	0.101065
C073	Esiniu	Guangdong	23.08	113.15	1.11	3	95.6	92.58	0.874952	0.125007	1e-05	1e-05	1e-05	1.1e-05	IndI	2.51115	6.40427	0.974929	68.5774	78.4677	2.15135	5.7348	1.14668	34.6371	43.6699
C074	cunsanli	Jiangsu	32.02	118.5	1.11	3	95.7	96.96	1e-05	1e-05	1e-05	1e-05	0.236462	0.763498	TeJ						5.31683	5.59753	0.966683	41.4019	53.2829
C075	Huangkezaonian	Jiangsu	32.02	118.5	1.13	3	96	97.93	1e-05	1e-05	1e-05	1.5e-05	1e-05	0.999945	TeJ	4.09914	6.71369	2.47919	58.7135	72.0056	1.35166	6.07033	0.810032	42.4575	50.6895
C076	Benbanggu-1	Sichuan	30.39	104.05	1.13	3	96.1	92.51	0.8659	0.13406	1e-05	1e-05	1e-05	1e-05	IndI	1.79772	5.9924	2.93321	48.4794	59.2027	4.09324	4.47129	1.66878	36.4874	46.7207
C077	Benbanggu-2	Yunnan	25.04	102.41	1.13	3	95.9	92.33	0.868742	0.131218	1e-05	1e-05	1e-05	1e-05	IndI	2.1232	5.40997	2.38318	56.3234	66.2397	2.77103	5.04511	1.45111	36.4492	45.7164
C078	Qitoubaigu	Yunnan	25.04	102.41	1.13	3	96.1	93.08	0.759072	0.218476	0.007195	0.005281	0.006559	0.003417	IndI	1.7345	6.44406	2.20115	62.3537	72.7334	2.69609	5.85042	0.760523	37.8251	47.1321
C079	Muguanuo-1	Hunan	28.11	113	1.13	3	96.2	97.42	1e-05	1e-05	1e-05	1e-05	1e-05	0.99995	TeJ	5.22754	5.32959	3.03531	61.739	75.3314	4.37913	2.76868	2.18625	42.7166	52.0507
C080	Hanmadao-1	Henan	34.48	113.42	1.13	3	96.2	92.86	0.999942	1e-05	1e-05	1.8e-05	1e-05	1e-05	IndI	2.40284	4.98625	1.4721	61.1538	70.015	2.33335	3.95124	0.65457	41.8855	48.8247
C081	Heidu4	Guangdong	23.08	113.15	1.13	3	96.2	92.49	0.865015	0.134945	1e-05	1e-05	1.1e-05	1e-05	IndI	3.45037	6.0375	3.44288	69.5749	82.5057	3.76	4.17548	1.06415	39.8301	48.8297
C082	Gaoyangdiandao	Hebei	38.02	114.28	1.14	3.1	96.5	97.84	1.4e-05	1e-05	1e-05	1e-05	1e-05	0.999946	TeJ						4.12346	5.04244	2.1195	51.0133	62.2987
C083	chikenuo	Fujian	26.05	119.18	1.13	3	96.2	96.85	0.048912	0.020638	0.007732	0.033331	0.027666	0.86172	TeJ	6.42442	7.27791	3.55928	71.2943	88.5559	4.40227	4.19059	0.848319	39.9765	49.4176
C084	Haobuka	Yunnan	25.04	102.41	1.13	3	96.2	96.82	1e-05	1e-05	1e-05	1e-05	0.673343	0.326617	Jap	4.86155	6.84008	4.18474	67.1173	83.0037	4.57722	6.49001	0.845958	38.0961	50.0093
C085	Shanjiugu	Sichuan	30.39	104.05	1.13	3	96.2	97.2	1e-05	1e-05	1e-05	1e-05	0.336547	0.663413	Jap						4.46546	6.00023	2.38027	39.8267	52.6727
C086	Fanhaopi	Yunnan	25.04	102.41	1.13	3	96.3	92.91	0.098561	0.047312	0.85021	1e-05	0.003898	1e-05	Aus	1.49155	4.0691	2.37466	46.3568	54.2921	2.70728	4.25023	1.96883	32.8754	41.8018
C087	Lixingeng	Sichuan	30.39	104.05	1.13	3	96.2	97.78	1e-05	1e-05	1e-05	1e-05	1e-05	0.99995	TeJ	3.87738	5.90045	2.80524	63.0127	75.5958	4.33281	5.98812	2.33312	38.2638	50.9179
C088	Nanganggu-2	Jiangsu	32.02	118.5	1.14	3	96.4	92.56	0.89202	0.049931	0.058016	1.2e-05	1e-05	1.1e-05	IndI						2.98004	5.14394	3.85337	50.6248	62.6022
C089	Tieganwu	Zhejiang	30.14	120.09	1.14	3	96.3	97.49	0.015602	1e-05	1e-05	1e-05	1e-05	0.984358	TeJ	2.94556	5.76622	3.86217	64.1794	76.7533	3.0907	7.53097	2.50827	48.0005	61.1305
C090	Sanlicun	Shanxi	34.16	108.54	1.13	3	96.2	92.44	0.235223	0.752309	0.012438	1e-05	1e-05	1e-05	IndII	2.44292	3.06286	5.64157	50.917	62.0644	3.69094	4.42011	4.56928	33.404	46.0844
C091	Meihuanuo-1	Sichuan	30.39	104.05	1.13	3	96.2	93.01	0.99995	1e-05	1e-05	1e-05	1e-05	1e-05	IndI	2.43429	4.21641	3.01543	53.3399	63.0061	3.15344	5.16291	1.61505	27.7956	37.727
C092	Meihuanuo-2	Yunnan	25.04	102.41	1.13	3	96.3	92.86	0.99995	1e-05	1e-05	1e-05	1e-05	1e-05	IndI	3.39897	6.28424	4.02783	64.5174	78.2285	2.84343	5.8228	2.77744	33.981	45.4247
C093	Xiangnuo-2	Guizhou	26.35	106.42	1.14	3.1	96.4	97.75	1e-05	1e-05	1e-05	1e-05	1e-05	0.99995	TeJ	5.66277	6.53496	3.90735	77.6955	93.8006	4.71542	4.52428	2.85023	49.8696	61.9596
C094	Menjiagao1	Hainan	20.2	110.3	1.14	3	96.4	92.95	0.439596	0.487062	0.000628	1e-05	0.03314	0.039563	Ind	4.79297	6.29989	4.43693	72.9293	88.4591	2.51863	5.2547	1.12829	27.7997	36.7014
C095	Xiaohonggu	Yunnan	25.04	102.41	1.14	3.1	96.5	92.61	0.918879	0.049265	0.031826	1e-05	1e-05	1e-05	IndI	2.25886	4.76449	6.7998	46.0477	59.8708	2.80707	3.74539	5.86082	48.9533	61.3666
C096	Jinxibai-1	Jiangxi	28.41	115.52	1.14	3.1	96.6	92.79	0.437735	0.550396	1e-05	0.011839	1e-05	1e-05	Ind	2.39757	6.18911	7.85334	42.1297	58.5698	3.00768	4.36197	5.46912	52.1757	65.0145
C097	Jinbaoyin	Fujian	26.05	119.18	1.13	3	96.3	92.74	0.483033	0.506652	1e-05	1e-05	0.00263	0.007665	Ind	3.65899	5.68352	4.23749	66.7929	80.3729	2.65201	5.55967	3.8576	42.9123	54.9816
C098	Hongainuo	Guangxi	22.48	108.2	1.14	3	96.3	93	0.509283	0.476993	1e-05	0.009158	1e-05	0.004545	Ind	3.02166	5.81012	5.88865	51.6942	66.4146	3.3444	6.03086	6.75056	43.8248	59.9506
C099	WH099	Guangxi	22.48	108.2	1.14	3.1	96.7	92.7	0.42697	0.55637	1e-05	0.007209	0.001921	0.00752	Ind	2.83735	5.48619	2.67944	57.6965	68.6995	3.00015	6.54962	4.16749	52.7953	66.5125
C100	WH100	Hubei	30	114	1.14	3.1	96.5	92.68	0.452941	0.545113	1e-05	1e-05	0.001916	1e-05	Ind	2.47114	6.29983	5.14367	53.43	67.3446	3.29438	5.79563	3.988	34.7715	47.8495
C101	Babaili	Yunnan	25.04	102.41	1.14	3.1	96.6	97.46	1e-05	1e-05	1e-05	1e-05	0.032929	0.967031	TeJ	6.88995	6.81618	4.36929	66.9653	85.0407	4.70669	4.36804	2.52868	51.3111	62.9145
C102	Qiyuexian	Guangxi	22.48	108.2	1.14	3.1	96.4	92.9	0.422706	0.557882	1e-05	1e-05	1e-05	0.019382	Ind	3.76442	6.05594	6.93099	52.4692	69.2206	3.10154	3.27924	4.18183	44.125	54.6876
C103	Yuyannuo-1	Yunnan	25.04	102.41	1.13	3	96.4	97.55	1e-05	1e-05	1e-05	1e-05	0.106479	0.893481	TeJ	6.74078	7.69836	3.26219	53.7439	71.4452	4.53234	4.2847	1.84249	42.8887	53.5483
C104	Mamagu-1	Sichuan	30.39	104.05	1.13	3	96.2	92.73	0.99995	1e-05	1e-05	1e-05	1e-05	1e-05	IndI	2.31692	2.1189	0.722981	47.979	53.1378	2.55871	5.34647	0.409901	31.5611	39.8762
C105	WH105	Yunnan	25.04	102.41	1.13	3	96.1	92.89	0.47112	0.304591	0.211967	1e-05	1e-05	0.012302	Ind						0.470799	5.12523	3.23839	40.1791	49.0135
C106	Hongkezhenuo	Guizhou	26.35	106.42	1.13	3	96.3	96.87	1e-05	1e-05	1e-05	1e-05	0.021774	0.978186	TeJ	3.72622	4.97193	3.47473	57.8733	70.0461	3.807	4.17518	2.04412	30.7409	40.7672
C107	Mowanggunei-2	Yunnan	25.04	102.41	1.12	3	95.9	92.44	0.365538	0.63384	0.000587	1.6e-05	1e-05	1e-05	Ind	2.50347	3.62387	5.8827	50.3951	62.4051	3.16377	4.76395	6.7876	37.0647	51.78
C108	Mamagu-2	Sichuan	30.39	104.05	1.1	3	93.6	92.62	0.99995	1e-05	1e-05	1e-05	1e-05	1e-05	IndI	1.43306		0.838806	54.0416		2.88974	3.7705	0.468663	35.9704	43.0993
C109	WH109	Yunnan	25.04	102.41	1.12	3	95.8	92.98	0.812089	0.133195	0.037558	1e-05	0.016898	0.00025	IndI	1.64782	4.17146	7.13289	65.1888	78.141	4.56166	5.3933	4.77564	32.8797	47.6103
C110	Xianggu	Yunnan	25.04	102.41	1.12	3	95.8	92.54	0.899666	0.06224	0.038064	1e-05	1e-05	1e-05	IndI						1.74721	3.34471	2.04502	25.5979	32.7349
C111	Ximaxian	Yunnan	25.04	102.41	1.12	3	95.9	97.66	1e-05	1e-05	1e-05	1e-05	0.056437	0.943523	TeJ						5.09121	5.51955	4.68157	61.1952	76.4876
C112	Jinnante43B	Hunan	28.11	113	1.12	3	96.1	92.74	0.884317	0.115643	1e-05	1e-05	1e-05	1e-05	IndI	2.16063	6.34849	2.97261	48.2645	59.7462	4.11468	5.11126	1.94342	41.7524	52.9218
C113	Xiangzaoxian7hao	Hunan	28.11	113	1.13	3	96.1	92.6	0.566685	0.428751	0.004531	1.3e-05	1e-05	1e-05	Ind	2.29408	7.13601	3.67484	66.7363	79.8412		5.75691	3.43662	65.0109
C114	80B	Hunan	28.11	113	1.12	3	95.9	92.61	0.522663	0.454785	0.010705	0.004098	1e-05	0.007739	Ind	2.68589	5.32824	4.40551	66.1436	78.5633		5.53806	4.10632	42.8801
C115	WH115	Hunan	28.11	113	1.12	3	96	92.47	0.112174	0.862539	1e-05	1e-05	1e-05	0.025257	IndII	2.36933	5.04893	3.95151	55.113	66.4828	4.64134	5.66942	2.95827	48.2483	61.5173
C116	LimingB	Liaoning	41.5	123.24	1.13	3	96.1	98.49	1e-05	1e-05	1e-05	1e-05	1e-05	0.99995	TeJ	4.44005	5.21351	2.094	53.4515	65.1991	4.35017	1.7468	2.04212	44.2132	52.3523
C117	Jiangnongzao1hao	Jiangxi	28.41	115.52	1.13	3	96.2	92.74	0.553857	0.41099	0.002429	0.002088	1e-05	0.030626	Ind	2.52897	5.3799	2.45625	53.0805	63.4456	2.96194	6.49988	0.628923	46.6184	56.7091
C118	Gu154	Unknown	NA	NA	1.13	3	96.2	92.49	0.070185	0.911088	0.018697	1e-05	1e-05	1e-05	IndII	2.15927	5.68874	1.54612	54.8194	64.2135	4.48317	5.52217	1.21902	39.55	50.7743
C119	Ninghui21	Unknown	NA	NA	1.11	3	93.8	96.63	0.01523	0.238669	1e-05	1e-05	1e-05	0.746071	TeJ	5.00444	5.4992	1.82951	66.1114	78.4445	3.06586	6.13985	1.1878	47.2385	57.6321
C120	Shuiyuan300li	Tianjin	39.09	117.11	1.13	3	96.3	98.67	1e-05	1e-05	1e-05	1e-05	1e-05	0.99995	TeJ	2.14405	4.94403	2.56036	56.8907	66.5391	4.49666	4.92516	1.75654	61.757	72.9354
C121	XiangaiB	Jiangxi	28.41	115.52	1.13	3	96.1	92.56	0.633945	0.350178	1e-05	1e-05	0.002547	0.013309	Ind	1.39633	2.32504	0.600359	39.7361	44.0578	3.64165	4.81897	1.02347	35.8997	45.3838
C122	Aituogu151	Sichuan	30.39	104.05	1.13	3	96.2	92.66	0.999949	1e-05	1e-05	1e-05	1.1e-05	1e-05	IndI						3.43827	4.67492	0.922619	43.1611	52.1969
C123	Taidongludao	Taiwan	25.03	121.31	1.12	3	96	96.37	0.028158	1e-05	1e-05	0.004132	0.767774	0.199916	TrJ	2.74423	4.20861	1.22148	48.2496	56.4239	3.39871	6.51133	3.30914
C124	menjiading2	Hainan	20.2	110.3	1.12	3	96.3	93.06	0.387424	0.460595	1e-05	1e-05	0.055191	0.09677	Ind	2.29174	5.11896	2.41415	59.4336	69.2585	3.40362	5.50841	0.811678	45.079	54.8027
C125	Jiefangxian	Jiangxi	28.41	115.52	1.13	3	96.2	92.46	0.936623	0.063332	1e-05	1e-05	1e-05	1.4e-05	IndI	2.75195	5.57188	6.53519	51.6758	66.5348	2.59624	2.74126	3.58415
C127	Baikehualuo	Guangdong	23.08	113.15	1.12	3	96.1	92.56	0.999944	1e-05	1e-05	1e-05	1.3e-05	1.3e-05	IndI	2.59237	5.76564	1.55237	55.2435	65.1539	2.54448	3.92897	1.67662
C128	Liuyezhan	Hubei	30	114	1.1	3	93.5	92.51	0.99995	1e-05	1e-05	1e-05	1e-05	1e-05	IndI	2.72009	5.22404	2.97733	50.7104	61.6319	2.8267	6.56221	2.04995	39.2282	50.667
C129	Aihechi	Jiangxi	28.41	115.52	1.12	3	95.8	92.39	0.400871	0.58529	1e-05	0.006751	0.007069	1e-05	Ind	3.13589	4.36095	3.2647	54.2276	64.9892	2.89072	4.40375	3.80755	36.607	47.709
C130	Xiangnuo-1	Guizhou	26.35	106.42	1.12	3	96.2	97.74	1.9e-05	1e-05	1e-05	1e-05	1.7e-05	0.999934	TeJ	4.51932	5.14901	2.53119	66.9798	79.1794	3.23702	5.49977	1.76796	53.4407	63.9454
C131	Xuanenchangtan	Hubei	30	114	1.12	3	96.1	92.64	0.99995	1e-05	1e-05	1e-05	1e-05	1e-05	IndI						1.99976	4.29162	4.42511	41.9636	52.6801
C132	Jinzhinuo	Yunnan	25.04	102.41	1.12	3	95.9	92.25	0.660344	0.334576	1e-05	1e-05	0.005051	1e-05	Ind	2.98708	4.41983	2.41523	42.8173	52.6394	5.40681	3.65014	1.71132	40.1974	50.9657
C133	Muguanuo-2	Shanxi	34.16	108.54	1.13	3	96.3	97.14	1e-05	1e-05	1e-05	1e-05	1e-05	0.99995	TeJ	3.02006	5.56723	2.55839	58.0855	69.2312	4.2462	6.50425	0.849613	33.9664	45.5664
C134	Wuzidui	Yunnan	25.04	102.41	1.12	3	95.9	98.12	1e-05	1e-05	1e-05	1e-05	0.003582	0.996378	TeJ	2.94259	4.87845	6.31556	50.7914	64.9281	1.94112	7.18907	2.65495	45.2213	57.0064
C135	Xibaizhan	Sichuan	30.39	104.05	1.12	3	95.9	93.8	0.798221	1e-05	1e-05	0.035116	0.034382	0.132261	IndI	2.81371	5.17876	0.236338	59.1342	67.363	3.94329	5.12482	0.845428	40.8096	50.7231
C136	Zegu	Guizhou	26.35	106.42	1.12	3	96	93.1	0.99995	1e-05	1e-05	1e-05	1e-05	1e-05	IndI	1.19049	4.83185	0.659574	59.2729	65.9548	2.83018	4.16181	0.630205	41.8614	49.4836
C137	Cungunuo	Guizhou	26.35	106.42	1.11	3	95.8	97.55	1.2e-05	1e-05	1e-05	1e-05	0.141505	0.858452	TeJ	2.69799	4.7426	2.94818	69.6094	79.9982	4.72328	4.73297	2.06482	38.9587	50.4797
C138	Lengshuigu	Yunnan	25.04	102.41	1.12	3	96	96.16	0.043702	0.04432	1e-05	1e-05	0.174697	0.737261	TeJ	1.6552	4.69037	3.56401	54.2407	64.1503
C139	WH139	Yunnan	25.04	102.41	1.11	3	95.8	93.58	0.743927	0.072217	1e-05	0.013936	0.020299	0.149611	IndI	1.18783	3.89876	2.39009	53.8488	61.3255	3.29405	6.55265	4.05974	47.2445	61.1509
C140	Wuzuhonggu	Yunnan	25.04	102.41	1.13	3	96.3	92.48	0.88763	0.07216	0.040179	1e-05	1e-05	1e-05	IndI	2.7817	4.52767	7.62876	46.6451	61.5832	2.57623	3.70241	5.95	42.0635	54.2921
C141	Nanganggu-1	Yunnan	25.04	102.41	1.12	3	96.2	92.93	0.892686	0.050188	0.057095	1.1e-05	1e-05	1e-05	IndI	3.15825		6.60565	39.8789		2.95501	3.07413	3.4361	36.0501	45.5154
C142	Mowanggunei-1	Yunnan	25.04	102.41	1.12	3	96	92.26	0.368708	0.630936	0.000319	1.7e-05	1e-05	1e-05	Ind	2.09556	5.07219	5.82576	52.8047	65.7982	3.6629	5.05407	5.63855	32.9962	47.3517
C143	Qitougu	Yunnan	25.04	102.41	1.11	3	95.8	92.84	0.924422	0.027692	0.017487	1e-05	0.03038	1e-05	IndI	2.30084	4.8789	5.45281	64.3813	77.0139	3.11507	3.92476	2.59185	34.2958	43.9275
C144	Huangpinuo	Yunnan	25.04	102.41	1.12	3	96	97.56	1e-05	1e-05	1e-05	1e-05	0.033532	0.966428	TeJ	4.18744	5.41011	2.97097	57.6248	70.1933	4.45866	4.33197	3.70964	51.3546	63.8548
C145	Zhenshan97B	Zhejiang	30.14	120.09	1.12	3	96	92.89	0.956081	1e-05	1e-05	1e-05	1.3e-05	0.043875	IndI						4.22052	7.91895	2.41344	65.525	80.0779
C146	Nipponbare	Japan	35.7	139.8	1.12	3	96.2	99.28	1e-05	1e-05	1e-05	1e-05	1e-05	0.99995	TeJ						3.04632	6.20536	2.63219	40.8353	52.7192
C147	Minghui63	Unknown	NA	NA	1.11	3	93.9	92.25	0.06058	0.911561	0.00575	1e-05	0.019275	0.002823	IndII						4.14755		0.724528	47.0153
C148	9311	Hunan	28.11	113	1.1	3	93.8	92.21	0.201425	0.786424	0.012121	1e-05	1e-05	1e-05	IndII	3.26901	6.32629	1.5721	59.1685	70.3359	3.48846	3.92361	0.540333	41.859	49.8114
C149	Zhonghua11	Beijing	39.54	116.28	1.11	3	93.8	98.29	1.6e-05	0.015248	1e-05	0.015101	1e-05	0.969615	TeJ						3.49509	6.69045	2.50906	51.2725	63.9671
C150	Balila	Italy	41.52	12.37	1.11	3	93.9	98.72	1e-05	1e-05	1e-05	1e-05	1e-05	0.99995	TeJ	3.51823	7.31534	2.6806	66.7819	80.2961	3.74024	6.86891	2.33453	46.0126	58.9563
C151	Nanjing11	Jiangsu	32.02	118.5	1.11	3	94	92.37	0.9635	0.036452	1e-05	1.8e-05	1e-05	1e-05	IndI	3.37561	6.78377	0.709768	68.5607	79.4299	3.23835	5.47554		34.4474
C152	02428	Jiangsu	32.02	118.5	1.12	3	96.1	97.29	0.040224	0.077497	1e-05	1.7e-05	0.149578	0.732673	TeJ	2.52232	5.24277	1.6215	49.6621	59.0487	3.63563	5.18653	1.77134	39.3768	49.9703
C153	IRAT109	Unknown	NA	NA	1.1	3	93.7	96.08	1e-05	1e-05	1e-05	1e-05	0.950822	0.049138	TrJ						3.52468	7.43349	2.45446	50.0983	63.5109
C154	Heigeng2hao	Heilongjiang	45.45	126.41	1.06	2.8	94.1	98.08	1e-05	1e-05	1e-05	1e-05	1e-05	0.99995	TeJ	3.24144	7.09772	2.80454	74.9939	88.1376		6.66855	3.13072	56.8913
C155	Erjiunan1hao	Zhejiang	30.14	120.09	1.13	3	96.4	92.86	0.986421	1e-05	1e-05	1e-05	1e-05	0.013539	IndI	2.03629	7.4763	3.80368	85.2534	98.5696		5.34095	2.46145	53.1696
C156	ChaoyangyihaoB	Hunan	28.11	113	1.13	3	96.3	92.55	0.99995	1e-05	1e-05	1e-05	1e-05	1e-05	IndI							6.15373	1.24839	59.8718
C157	L301B	Hunan	28.11	113	1.06	2.8	93.7	92.81	0.724132	0.228512	1e-05	1e-05	1e-05	0.047327	IndI	3.29952	7.40392	1.44367	83.3221	95.4692		5.83621	0.63316	55.3608
C158	Guangluai15	Guangxi	22.48	108.2	1.11	3	93.8	92.86	0.99995	1e-05	1e-05	1e-05	1e-05	1e-05	IndI	2.09651	5.15195	0.119215	44.1286	51.4963	3.80721	5.25138		50.4107
C159	ZhuzhenB	Hunan	28.11	113	1.16	3.1	96.3	92.65	0.973106	0.026455	0.000405	1.3e-05	1e-05	1e-05	IndI						4.50397	6.43133	0.501784	35.0496	46.4867
C160	Baoxie-7B	Hunan	28.11	113	1.12	3	96	93.02	0.404442	0.491824	1e-05	0.014664	0.08905	1e-05	Ind	2.39879	6.4002	0.801972	41.4507	51.0516	3.99404	5.57541	0.935661	52.0449	62.55
C161	Gzhenshan97B	Sichuan	30.39	104.05	1.12	3	96.2	92.69	0.974018	0.025597	0.000354	1e-05	1e-05	1e-05	IndI	2.80595	6.82527	0.736213	77.7451	88.1126	4.40214	1.9257	1.5788	40.0825	47.9892
C162	Nanxiongzaoyou	Guangdong	23.08	113.15	1.13	3	96.2	92.69	0.569742	0.41327	0.003943	0.006575	0.004047	0.002424	Ind	1.76832	5.07107	1.60976	36.7281	45.1773		5.35885	1.92847	48.6763
C163	Zaoshuxianghei	Guangxi	22.48	108.2	1.13	3	96.2	92.48	0.190237	0.73236	1e-05	0.016362	1e-05	0.061022	IndII	2.96816	6.66322	3.23563	69.9827	82.8497	3.90392	5.09308	3.06578	45.234	57.2968
C164	IR661-1	Unknown	NA	NA	1.12	3	96	93.11	0.136623	0.699524	1e-05	0.041679	1e-05	0.122153	IndII						3.79035	2.80517	2.60175
C165	Nanjing11-2	Jiangsu	32.02	118.5	1.13	3	96.2	92.52	0.99995	1e-05	1e-05	1e-05	1e-05	1e-05	IndI	1.92177	4.98902	1.45651	50.5669	58.9342	2.57516	5.42056	0.351096	43.2131	51.56
C166	Gui630	Unknown	NA	NA	1.13	3	96.5	92.36	0.418106	0.545746	1e-05	1e-05	0.034554	0.001575	Ind	2.0584	4.20819	1.01649	56.9982	64.2813	4.27567	4.73662	1.47488	47.3853	57.8725
C167	76--1	Unknown	NA	NA	1.13	3	96.1	92.38	0.51257	0.48739	1e-05	1e-05	1e-05	1e-05	Ind	2.61099	4.93782	0.944856	51.5387	60.0324	2.63036	4.21673	0.705482	42.7812	50.3338
C168	Xugunuo	Hunan	28.11	113	1.12	3	95.8	92.5	0.508882	0.491078	1e-05	1e-05	1e-05	1e-05	Ind	2.9389	5.05837	1.20261	53.8718	63.0716	2.67073	4.85688	0.47429	34.3148	42.3167
C169	Taizhongzailai1	Taiwan	25.03	121.31	1.13	3	96.3	92.8	0.36584	0.63412	1e-05	1e-05	1e-05	1e-05	Ind	1.54554	4.42807	1.84649	47.4743	55.2944	1.90353	5.40809	2.88027	51.6386	61.8305
C170	Xiangwanxian1hao	Hunan	28.11	113	1.12	3	95.8	92.41	0.731844	0.268115	1e-05	1.2e-05	1e-05	1e-05	IndI	2.89716	5.6749	1.0702	63.8982	73.5405	4.23226	6.42435	0.739649	38.0876	49.4838
C171	Xingguo	Jilin	40.5	121.5	1.12	3	96	97.37	1e-05	1e-05	1e-05	1e-05	0.004845	0.995115	TeJ	2.71051	6.28775	3.80276	73.7346	86.5356	1.40624	5.07493	0.665951	43.8577	51.0048
C172	Zhonghua8hao	Beijing	39.54	116.28	1.11	3	95.8	98.26	1e-05	0.015107	1e-05	0.014885	1e-05	0.969978	TeJ	2.17661	5.43847	1.61608	48.5052	57.7363	3.09116	6.72784	2.34414	44.9833	57.1464
C173	Aimakang	Sichuan	30.39	104.05	1.12	3	96	92.57	0.98852	0.01144	1e-05	1e-05	1e-05	1e-05	IndI	1.98649	6.17046	0.886984	56.6552	65.6992	3.19286	5.51698	1.06632	36.3582	46.1344
C174	JWR221	Unknown	NA	NA	1.13	3	96.2	92.5	0.202659	0.785216	0.012095	1e-05	1e-05	1e-05	IndII	1.47503	5.01202	0.977283	53.0367	60.5011	2.57597	6.72355	0.947612	31.3753	41.6224
C175	Zhengxian232	Jiangsu	32.02	118.5	1.11	3	96.1	92.53	0.523403	0.448574	0.027989	1.4e-05	1e-05	1e-05	Ind	2.34102	3.95216	4.24625	63.7362	74.2757	2.37564	4.15367	1.3737	34.9769	42.8799
C176	Chenwan3hao	Hunan	28.11	113	1.12	3	96	92.81	0.584988	0.412579	1e-05	0.000457	1e-05	0.001956	Ind	2.92401	5.59825	3.52398	57.9471	69.9933	3.85362	5.574	4.31918	58.6419	72.3887
C177	Maguzi	Shanxi	34.16	108.54	1.12	3	95.9	97.45	1e-05	1e-05	1e-05	1e-05	0.070253	0.929707	TeJ	2.32854	5.40959	0.568192	45.8475	54.1538	2.0905	5.95633	1.49651	51.4391	60.9824
C178	Aimi	Jiangxi	28.41	115.52	1.12	3	95.9	92.57	0.778226	0.207324	1e-05	1e-05	0.006817	0.007614	IndI	2.45704	6.57937	0.912117	50.4947	60.4432
C179	Haobayong1	Yunnan	25.04	102.41	1.12	3	96.1	97.46	1e-05	1e-05	1e-05	1e-05	0.311066	0.688894	Jap						3.10368	7.19683	2.05275	25.9325	38.2858
C180	Wanlixian	Hunan	28.11	113	1.07	2.9	94.4	92	0.99995	1e-05	1e-05	1e-05	1e-05	1e-05	IndI	2.39461	7.29217	2.69925	59.5531	71.9392	4.56539	3.16334	0.46912
C181	Feidongtangdao	Anhui	37.51	117.18	1.1	3	94.6	97.46	1e-05	1e-05	1e-05	1.3e-05	0.062092	0.937865	TeJ						0.469022	4.53311		42.4916
C182	Hengxianliangchun	Guangxi	22.48	108.2	1.12	3	96.1	92.69	0.983912	0.015306	1e-05	1.4e-05	1e-05	0.000747	IndI	3.16974	7.41037	5.01665	82.584	98.1808	2.72783	4.84392	3.60904	31.9075	43.0883
C184	Baikezaohe	Hunan	28.11	113	1.1	3	94.4	91.92	0.926454	0.067641	0.005873	1.2e-05	1e-05	1e-05	IndI	2.28789	5.9919	4.29351	58.9871	71.5604	4.07737	2.43254	2.29389	30.4752	39.279
C185	Haomake(K)	Yunnan	25.04	102.41	1.1	3	94.5	96.13	1e-05	1e-05	1e-05	1e-05	0.649565	0.350395	Jap						6.46701	5.50432	0.829907	33.9724	46.7736
C186	Sanbangqishiluo	Yunnan	25.04	102.41	1.1	2.9	94.4	95.87	1.1e-05	1e-05	1e-05	0.005471	0.713505	0.280993	TrJ	3.00529	5.1675	2.45919	49.6481	60.2801	3.46954	6.33528		33.5457
C187	Niankenuo	Guizhou	26.35	106.42	1.1	2.9	94.4	97.44	1e-05	1e-05	1e-05	1e-05	1e-05	0.99995	TeJ						5.14554	6.7573	4.09128	54.0327	70.0269
C188	Yangkenuo	Guizhou	26.35	106.42	1.11	3	94.6	97.68	1.3e-05	1.4e-05	1e-05	1e-05	1e-05	0.999943	TeJ	3.70305	6.2727	4.07408	52.9098	66.9596	4.48296	3.64893	2.04616	23.309	33.4871
C189	Putaohuang	Tianjin	39.09	117.11	1.1	2.9	94.4	97.39	1e-05	1.2e-05	1e-05	1.1e-05	1e-05	0.999947	TeJ	2.7227	8.10871	1.93426	50.1827	62.9483	3.41235	5.26974	2.78007	50.2212	61.6833
C190	Xiangdao	Henan	28.11	113	1.18	3.2	94.5	92.79	0.957848	0.016279	1e-05	1e-05	1.1e-05	0.025841	IndI	1.55173	5.99308	3.70559	51.0808	62.3312	1.23294	4.30655	5.07823	43.7064	54.3241
C191	Younian	Guizhou	26.35	106.42	1.11	3	94.7	92.24	0.870264	0.120433	0.00519	1e-05	0.004093	1e-05	IndI	2.15093	5.68754	1.91931	55.5209	65.2786	2.50733	4.84576		40.9432
C192	Wukezhan	Fujian	26.05	119.18	1.13	3	96.4	92.64	0.510653	0.489307	1e-05	1e-05	1e-05	1.1e-05	Ind	3.02701	6.41639	4.08688	45.5075	59.0378	2.58455	4.68584	4.02098	62.62	73.9114
C193	Zhongnong4hao	Sichuan	30.39	104.05	1.13	3	96.5	91.24	0.865291	0.082697	0.051982	1e-05	1e-05	1e-05	IndI	2.82631	7.97213	2.24225	83.4527	96.4934	2.41663	3.72896	0.488647	35.5574	42.1916
C194	Minbeiwanxian	Fujian	26.05	119.18	1.1	3	94.5	91.95	0.550916	0.446363	1e-05	1e-05	1e-05	0.002691	Ind	2.95255	4.44201	3.43623	46.0304	56.8612	2.54752	6.23734	1.83631	28.4008	39.022
C195	Hongmisandan	Jiangxi	28.41	115.52	1.09	2.9	94.3	96.98	0.009667	1e-05	0.003301	1e-05	1e-05	0.987001	TeJ	3.32112	3.48737	3.19024	71.154	81.1528	4.44716	6.86266	2.88935	39.6281	53.8273
C196	Yuyannuo-2	Yunnan	25.04	102.41	1.13	3	96.5	97.31	1e-05	1e-05	1e-05	1.1e-05	0.107255	0.892704	TeJ						4.44011	3.47136	2.70106	41.5405	52.153
C197	Maweinian	Guizhou	26.35	106.42	1.13	3	96.6	92.58	0.99995	1e-05	1e-05	1e-05	1e-05	1e-05	IndI	2.84467	5.29165	2.04179	61.2947	71.4728	0.92873	3.82332	0.153074	35.4191	40.3242
C198	Zinuo	Yunnan	25.04	102.41	1.13	3	96.6	92.29	0.706813	0.22959	0.023749	0.013827	0.021058	0.004962	IndI	2.24591	6.31628	3.92179	52.3815	64.8655	4.57175	3.60687	3.18316	42.1882	53.55
C199	Beizinuo	Yunnan	25.04	102.41	1.13	3	96.3	92.56	0.902891	0.048763	0.008762	1e-05	0.024646	0.014928	IndI	2.53492	3.24715	5.0982	44.8984	55.7786	2.41669	6.48095	4.70848	37.1393	50.7454
C200	Biwusheng	Yunnan	25.04	102.41	1.13	3	96.4	92.55	0.894217	0.036797	0.068953	1e-05	1e-05	1.3e-05	IndI	3.20339	5.57055	6.3074	55.8022	70.8835	2.63439	3.59902	4.89632	48.5932	59.7229
C201	Yizhixiang	Fujian	26.05	119.18	1.13	3	96.4	92.44	0.518837	0.481123	1e-05	1e-05	1e-05	1e-05	Ind	3.12461	6.12144	6.62468	43.5407	59.4114	2.61106	5.08974	4.2965	56.0315	68.0289
C202	Xiaobaimi	Guizhou	26.35	106.42	1.13	3	96.7	92.33	0.988698	0.011262	1e-05	1e-05	1e-05	1e-05	IndI	1.74795	6.30358	4.6299	48.1746	60.8561	2.42434	4.29472	3.25042	33.2296	43.1991
C203	Zaoxian240	Anhui	37.51	117.18	1.13	3	96.6	93.05	0.909531	0.048232	1e-05	1.3e-05	1e-05	0.042203	IndI							5.60894	3.52906	46.2285
W001	Mayang Khang	Indonesia	-6.08	106.45	1.16	3.1	97	92.26	0.996533	1e-05	1e-05	1e-05	0.003427	1e-05	IndI						1.40098	3.82496	0.0766804	40.1847	45.4873
W002	E B Gopher	United States	38.54	-77.02	1.16	3.1	97.2	94.02	1e-05	1e-05	1e-05	1e-05	0.99995	1e-05	TrJ	2.32566	5.43397	1.72353	47.5967	57.0798	2.76275	4.68081	1.27705	45.9558	54.6764
W003	C 5560	Thailand	13.5	100.29	1.16	3.1	97	95.52	1e-05	1e-05	1e-05	1e-05	0.761132	0.238828	TrJ	2.77864	6.31407	1.92563	58.9597	69.9781	4.3644	4.30744	1.16881	41.2148	51.0554
W004	Quinimpol	Philippines	14.6	121	1.16	3.1	97.2	95.11	1e-05	1e-05	1e-05	1.1e-05	0.999944	1.5e-05	TrJ						5.14537	5.96228	2.96668	43.0254	57.0997
W005	TAICHU MOCHI 59	Taiwan	25.02	121.38	1.16	3.1	97.3	94.7	0.007992	0.003022	0.012382	0.015762	0.960832	1e-05	TrJ	3.18396	5.6561	2.45047	60.9302	72.2207	3.16815	7.57721	1.8442	40.5318	53.1214
W006	WC 2811	Micronesia	6.55	158.1	1.16	3.1	97.3	94.84	1e-05	1e-05	1e-05	1e-05	0.99995	1e-05	TrJ	2.9308	5.20029	3.83443	66.0656	78.0311	1.95446	6.30659	1.56067	42.4522	52.2739
W007	Criollo Chivacoa 2	Venezuela	10.3	-66.58	1.16	3.1	95.4	95.91	1e-05	1e-05	1e-05	1e-05	0.99995	1e-05	TrJ	3.63659	4.19102	2.56988	69.8338	80.2313	3.2014	6.85447	2.1823	59.6147	71.8528
W008	Secano do Brazil	El Salvador	13.7	-89.19	1.16	3.1	97.2	94.23	1e-05	1e-05	1e-05	1e-05	0.99995	1e-05	TrJ	4.15809	8.0602	2.68745	54.9569	69.8627	3.65437	6.89425	2.7226	46.1511	59.4224
W009	BERLIN	Costa Rica	10	-84	1.16	3.1	97.2	91.41	0.367153	0.574601	0.033731	1e-05	0.024496	1e-05	Ind	1.51445	6.80907	2.18007	55.3139	65.8175	2.97745	6.39925	3.62862	50.8858	63.8911
W010	Sel. No. 388	Uruguay	-34.53	-56.09	1.16	3.1	97.2	95.17	1e-05	1e-05	1e-05	1e-05	0.455577	0.544383	Jap	2.52768		2.24374	50.3412		4.76283	5.93602	2.16824	55.7429	68.61
W011	SHIMIZU MOCHI	Japan	35.7	139.8	1.16	3.1	97.4	97.93	1e-05	1.2e-05	1e-05	1e-05	1e-05	0.999948	TeJ	2.97643	5.8902	1.56593	43.0495	53.4821	5.78454	6.89137	2.14107	57.5446	72.3615
W012	KRASNODARSKIJ 424	Russian Federation	55.45	37.37	1.16	3.1	97.5	97.65	1e-05	1e-05	1e-05	1.4e-05	1e-05	0.999946	TeJ	2.58432	6.4438	2.44239	43.612	55.0825		10.5345	1.7964	51.8024
W013	Pergonil 15	Portugal	38.42	-9.05	1.16	3.1	97.4	53.85	1.5e-05	1.6e-05	1e-05	1e-05	0.124118	0.875831	TeJ						4.12487	8.51208	1.96081	61.5328	76.1306
W014	Red Khosha Cerma	Afghanistan	34.5	69	1.16	3.1	97.4	94.05	1e-05	1e-05	0.153484	0.846476	1e-05	1e-05	VI	3.0074	6.65503	3.34382	56.296	69.3022	3.95499	6.41157	1.82623	38.7718	50.9646
W015	Safut Khosha	Afghanistan	34.5	69	1.16	3.1	95.6	92.57	1e-05	1e-05	0.99995	1e-05	1e-05	1e-05	Aus						2.02536	3.0034	1.07225	35.7297	41.8307
W016	NORIN 11	Japan	35.7	139.8	1.16	3.1	97.2	97.78	1e-05	1.1e-05	1e-05	1e-05	1e-05	0.999949	TeJ	1.97488	6.36864	3.16882	56.9107	68.4231		5.88413	1.91135	48.585
W017	R 75	Senegal	14.38	-17.27	1.16	3.1	97	94.11	1e-05	1e-05	1e-05	1e-05	0.99995	1e-05	TrJ	3.32448	6.90288	2.96301	51.7404	64.9307	3.56378	6.39247	3.98903	43.2585	57.2037
W018	UZ ROSZ M38	Uzbekistan	41.16	69.13	1.16	3.1	97.1	97.04	1e-05	1.1e-05	1e-05	1.9e-05	0.171051	0.8289	TeJ							5.33622	0.137199	66.9938
W019	H57-3-1	Argentina	-34.62	-54.84	1.16	3.1	97.2	95.39	1.8e-05	1e-05	1e-05	1e-05	0.578438	0.421515	Jap	2.69045	6.77595	4.03561	61.075	74.577	3.44756	6.29642	2.55719	42.7893	55.0904
W020	IARI 6626	India	28.6	77.2	1.16	3.1	97.1	91.89	0.100025	0.048977	0.849954	1e-05	0.001024	1e-05	Aus						4.35821	5.30893	1.62374	36.0446	47.3355
W021	Khao Luang	Laos	17.96	102.61	1.16	3.1	97.4	95.72	1e-05	1e-05	1e-05	1e-05	0.682072	0.317888	Jap	5.17933	7.38497	2.63261	63.7958	78.9927	2.93068	5.9868	0.727425	30.1998	39.8447
W022	C 8429	Papua New Guinea	-9.5	147.2	1.16	3.1	97.1	95.04	1e-05	1e-05	1e-05	1e-05	0.99995	1e-05	TrJ	3.62701	5.23167	4.34544	60.527	73.7312	3.361	5.55836	4.44609	43.8332	57.1987
W023	Warrangal Culture 1252	India	28.6	77.2	1.02	2.7	95.1	90.18	0.296104	0.64138	0.005553	0.00512	0.046562	0.005281	Ind	3.82757	5.88225	3.06744	59.0783	71.8555	2.76349	5.54322	2.85107	49.311	60.4688
W024	Padi Pohon Batu	Malaysia	3.2	101.7	1.16	3.1	97.1	95	1e-05	1e-05	1e-05	1e-05	0.99995	1e-05	TrJ	3.18191	5.68849	2.36159	39.222	50.454	3.31022	6.89221	4.62175	47.296	62.1202
W025	NC 1/536	Pakistan	33.4	73.08	1.2	3.2	95.8	92.25	1e-05	1e-05	0.99995	1e-05	1e-05	1e-05	Aus						3.54132	5.9424	1.09776	41.649	52.2305
W026	Won Son Zo No. 11	Korea	37.6	127	1.13	3	95.6	92.43	0.863429	0.136531	1e-05	1e-05	1e-05	1e-05	IndI	4.01688	6.44943	1.43704	76.3811	88.2845	3.50798	5.67065	0.808221	35.5991	45.586
W027	Chacareiro Uruguay	Uruguay	-34.53	-56.09	1.02	2.7	95.3	97.57	1.1e-05	1e-05	1e-05	1e-05	0.186257	0.813702	TeJ	2.40072	4.23117	1.76739	65.1979	73.5972	4.16963	3.32457	1.47533	40.5348	49.5043
W028	Doble Carolina	Uruguay	-34.53	-56.09	1.08	2.9	95.3	92.16	1e-05	1e-05	0.99995	1e-05	1e-05	1e-05	Aus						2.68098	5.14546	1.64656	45.1385	54.6115
W029	Ai Chueh Ta Pai Ku	Taiwan	25.02	121.38	1.15	3.1	95.1	92.17	0.727662	0.268435	1e-05	1.2e-05	0.00387	1e-05	IndI	1.86976	5.17813	3.2276	62.881	73.1565	3.20225	4.93136	3.88048	58.4342	70.4483
W030	Thang 10	Vietnam	21.03	105.85	1.15	3.1	94.9	92.34	0.383885	0.548088	0.010146	0.017014	0.040641	0.000227	Ind	4.32269	6.08328	3.76847	71.9139	86.0883	2.24006	6.31104	1.71722	40.843	51.1113
W031	Sipirasikkam	Indonesia	-6.08	106.45	1.16	3.1	95.1	92.11	0.851208	0.148735	1e-05	1e-05	1.9e-05	1.8e-05	IndI	1.75676	5.16102	1.89711	42.1137	50.9286	1.87007	5.31	1.62882	41.6025	50.4113
W032	TJ	Guyana	6.46	-58.1	1.16	3.1	95.2	92.23	0.856285	0.143675	1e-05	1e-05	1e-05	1e-05	IndI	2.19034	5.5668	2.22411	40.8805	50.8617	3.2311	4.60536	1.30939	40.1722	49.318
W033	PD 46	Sri Lanka	6.55	79.52	1.16	3.1	95.2	92.22	0.904814	0.095146	1e-05	1e-05	1e-05	1e-05	IndI	1.3634	5.77751	1.41626	48.5854	57.1425	3.05656	6.65049	2.25192
W034	PATNAI 6	Myanmar	16.8	96.15	1.15	3.1	95	91.04	0.016276	1e-05	0.965186	0.007566	0.010906	5.6e-05	Aus	1.04224	4.93077	2.05221	48.0899	56.1151	3.07298	5.3458	1.5215	49.791	59.7313
W035	K8C-263-3	Suriname	5.52	-55.14	1.16	3.1	95.2	91.25	0.458813	0.499385	0.006276	0.005447	0.011447	0.018632	Ind	2.52182	6.20246	3.52706	59.8497	72.1011	2.38505	6.59726	2.64547	43.2385	54.8663
W036	Chun 118-33	China	39.9	116.4	1.16	3.1	95.3	92.32	0.928793	0.071167	1e-05	1e-05	1e-05	1e-05	IndI	4.14337	6.58539	5.12018	85.9704	101.819	3.28185	5.73618	1.7542	43.467	54.2392
W037	Manga Kely 694	Madagascar	-19	48	1.16	3.1	95.5	92.88	0.219041	0.327194	0.336868	0.013262	0.103625	1e-05	Admix	4.17421	6.94262	2.88168	79.391	93.3895	3.1982	3.82137	0.987754	48.8189	56.8263
W038	BLUE STICK	Fiji	-18.08	178.25	1.15	3.1	95.2	97.84	1e-05	1e-05	1e-05	1e-05	1e-05	0.99995	TeJ	4.30774	5.74093	3.81682	69.4543	83.3198	2.64699	5.24477	2.0074	42.6215	52.5207
W039	Nam Dawk Mai	Thailand	13.8	100.5	1.16	3.1	95.3	90.59	0.999945	1e-05	1e-05	1.5e-05	1e-05	1e-05	IndI	3.4464	5.52769	2.54426	79.9399	91.4582	2.66056	3.77827	1.09047	39.791	47.3203
W040	INIAP 7	Ecuador	-0.54	-89.36	1.16	3.1	95.5	91.87	0.0576	0.935498	1e-05	1e-05	0.006873	1e-05	IndII	3.98666	5.65153	5.83713	79.3546	94.8299	4.28477	6.05391	3.72168	51.6326	65.693
W041	Onu B	Zaire	-4.18	15.18	1.16	3.1	95	96	1e-05	1e-05	1e-05	1.4e-05	0.965887	0.034068	TrJ						1.69953	4.75151	2.124	54.8809	63.4559
W042	Red	Pakistan	33.4	73.08	1.01	2.7	94.8	91.77	0.174732	0.269314	0.44033	1e-05	1e-05	0.115605	Admix	3.23708	5.59149	4.66547	46.6752	60.1692	4.06301	6.03205	3.80327	55.7944	69.6927
W043	Dichroa Alef Uslkij	Kazakhstan	48	68	1.16	3.1	95	90.38	0.060861	0.939099	1e-05	1e-05	1e-05	1e-05	IndII	3.06573	5.87343	2.30452	54.4697	65.7133	2.39037	4.77817	2.57497	49.1222	58.8657
W044	BKN 6987-68-14	Thailand	13.5	100.29	1.16	3.1	95.3	91.96	0.021099	0.978861	1e-05	1e-05	1e-05	1e-05	IndII	3.55026	5.91277	3.37359	80.1623	92.9989	2.79924	5.58823	0.96413	38.4589	47.8105
W045	KUBANETS 508	Russian Federation	55.45	37.37	1.16	3.1	94.9	97.55	1e-05	1e-05	1e-05	1e-05	1e-05	0.99995	TeJ							6.33261	2.28446	49.3259
W046	IR 9660-48-1-1-2	Philippines	14.6	121	1.15	3.1	95.1	91.34	1e-05	0.992366	1e-05	0.000244	0.00736	1e-05	IndII	2.95589	5.65164	2.68172	62.4801	73.7693	2.93319	6.05838	0.316684	37.6006	46.9089
W047	Jumli dhan	Nepal	27.7	85.3	1.15	3.1	94.5	94.96	1.5e-05	1e-05	0.032168	0.159593	0.267157	0.541057	Jap	2.11408	5.68313	2.95663	53.8096	64.5635	3.15361	6.14741	2.199	40.5027	52.0028
W048	N-2703	Nepal	27.7	85.3	1.16	3.1	95	91.14	0.133356	0.049733	0.782478	1e-05	0.034413	1e-05	Aus	1.59194	5.57773	2.95144	59.2508	69.3719	3.00764	5.4528		33.5291
W049	PHUDUGEY	Bhutan	27.5	89.7	1.12	3	95.2	92.17	1e-05	1e-05	0.99995	1e-05	1e-05	1e-05	Aus						3.24183	3.86948	1.72734	33.9337	42.7724
W050	Ak Tokhum	Azerbaijan	40.22	49.53	1.15	3.1	94.9	94.25	1e-05	1e-05	1e-05	0.81614	1e-05	0.18382	VI						3.95032	5.21555	2.05221	56.4458	67.6639
W051	RP2151-173-1-8	India	28.6	77.2	1.12	3	94.7	91.8	1e-05	0.908244	0.08127	1e-05	0.007141	0.003325	IndII	1.88729	4.74179	2.00845	42.3117	50.9493		4.59913	1.09367	41.1717
W052	HB-6-2	Hungary	47.26	19.15	1.16	3.1	95.2	97.55	1e-05	1e-05	1e-05	1e-05	0.043695	0.956265	TeJ	3.45561		3.55779	62.366		3.48641	5.19894	1.45074	54.3875	64.5236
W053	GPNO 1106	Guatemala	14.38	-90.22	1.15	3.1	94	95.41	1e-05	1e-05	1e-05	1e-05	0.99995	1e-05	TrJ	2.92709	5.27913	2.55434	51.0002	61.7607	3.36885	5.639	1.60956	44.843	55.4604
W054	Toga	India	28.6	77.2	1.12	3	95	92.11	0.528745	0.465525	6.7e-05	1e-05	0.005642	1e-05	Ind						4.22015	6.02731	1.63626	36.9131	48.7968
W055	Ragasu	Taiwan	25.02	121.38	1.15	3.1	94.7	91.94	0.112511	0.362686	1e-05	1e-05	0.421257	0.103526	Admix	1.99846	6.00145	1.55545	44.5154	54.0708	2.41473	4.96203	0.458959	31.5092	39.345
W056	Tamanishiki	Japan	35.7	139.8	1.16	3.1	95.1	98.62	1e-05	1e-05	1e-05	1.2e-05	1e-05	0.999948	TeJ						3.24235	5.89471	2.17998	44.3099	55.627
W057	Grassy	Haiti	18.32	-72.2	1.17	3.1	97	95.78	1e-05	1e-05	1e-05	1.2e-05	0.999948	1e-05	TrJ						3.26104	5.74665	2.2522	51.3838	62.6437
W058	Kao Chio Lin Chou	Taiwan	25	121.7	1.16	3.1	95.2	92.78	0.79024	0.200176	1e-05	1e-05	0.007899	0.001666	IndI						4.30296	4.17251	1.33272	43.7	53.5081
W059	Niwahutaw Mochi	Japan	35.7	139.8	1.16	3.1	95.2	98.7	1e-05	1e-05	1e-05	1e-05	1e-05	0.99995	TeJ	3.65497	5.96709	2.39924	53.1532	65.1746	4.29212	3.77551		40.8472
W060	Somewake	Japan	35.7	139.8	1.16	3.1	95.4	97.83	1e-05	1e-05	1e-05	1e-05	1e-05	0.99995	TeJ	2.87498	6.42294	2.63774	63.737	75.6727	4.67091		2.57461	67.7848
W061	Ardito	Italy	41.52	12.37	1.16	3.1	95.1	96.66	1e-05	1.5e-05	1e-05	1.2e-05	0.438113	0.561839	Jap	3.6614	5.67748	2.39276	82.8443	94.5759	3.28851	6.21686	2.61334	50.1561	62.2748
W062	NANTON NO. 131	Taiwan	25.02	121.38	1.14	3.1	95.3	95.25	0.038299	1e-05	1e-05	0.137732	0.737189	0.08676	TrJ	6.38176	5.47643	2.35053	66.4218	80.6305	4.8991	4.12368	0.464738	45.2823	54.7698
W063	Vary Tarva Osla	Portugal	38.42	-9.05	1.14	3.1	95.3	96.32	1e-05	1e-05	1e-05	1.8e-05	0.526673	0.473279	Jap	2.78948	5.78695	2.22048	51.1953	61.9922	4.28182	6.86858	2.47456	43.2208	56.8458
W064	CSORNUJ	Hungary	47.26	19.15	1.15	3.1	95.6	97.31	1e-05	1e-05	1e-05	1e-05	1e-05	0.99995	TeJ							5.93759	2.4617	48.0432
W065	R 67	Senegal	14.38	-17.27	1.15	3.1	95.8	95.51	1e-05	1e-05	1e-05	1.1e-05	0.999949	1e-05	TrJ	3.39438	6.20018	4.56665	79.1017	93.2629	2.07527	4.63526	1.74476	37.2899	45.7452
W066	IR 238	Philippines	14.6	121	1.15	3.1	95.6	92.66	0.069617	0.710236	0.012156	1e-05	0.207971	1e-05	IndII	2.74398	6.57484	2.71605	80.2391	92.274	3.64203	6.51488	1.86351	52.4326	64.453
W067	Mitak	Indonesia	-6.08	106.45	1.15	3.1	95.9	95.81	1e-05	1e-05	1e-05	1e-05	0.99995	1e-05	TrJ	2.61801	6.50321	2.72111	68.1642	80.0065	1.67032	6.84587	2.36546	53.0743	63.9559
W068	Gazan	Afghanistan	34.5	69	1.14	3.1	95.3	97.04	1e-05	1e-05	1e-05	0.080452	1e-05	0.919508	TeJ	3.15202	7.48596	5.21092	78.0824	93.9313	4.8159	4.73008	2.85899	43.915	56.32
W069	99216	India	28.6	77.2	1.15	3.1	95.5	91.86	1e-05	0.031667	0.968293	1e-05	1e-05	1e-05	Aus						3.49728	5.60765	1.98262	45.6607	56.7482
W070	Shui Ya Jien	Hong Kong	22.17	114.08	1.15	3.1	95.5	91.74	0.335186	0.664774	1e-05	1e-05	1e-05	1e-05	Ind	3.79033	5.31177	2.05322	58.6301	69.7854	2.71195	4.47376	2.03299	40.5911	49.8098
W071	AKP 4	India	28.6	77.2	1.15	3.1	95.5	91.81	0.511468	0.449607	0.029442	1e-05	0.009463	1e-05	Ind							5.48507	2.5712	41.6347
W072	SORNAVARI	Mali	12.4	-7.59	1.1	2.9	94.8	91.74	1e-05	1e-05	0.999948	1.2e-05	1e-05	1e-05	Aus	1.27575	4.19368	2.45453	40.7245	48.6484	2.76045	4.61421	1.50499	42.8848	51.7644
W073	IR 2061-214-2-3	Philippines	14.6	121	1.18	3.2	95.8	71.6	1e-05	0.99995	1e-05	1e-05	1e-05	1e-05	IndII	3.60666	6.39377	5.99766	85.0671	101.065	3.73196	4.74356	1.74114	37.8644	48.081
W074	TAINUNG 45	Taiwan	25.02	121.38	1.18	3.2	95	91.51	0.412781	0.587179	1e-05	1e-05	1e-05	1e-05	Ind	4.22416	5.73653	4.62275	58.9697	73.5532	3.50125	2.65357	3.67657	52.6969	62.5283
W075	Sapundali Local	India	28.6	77.2	1.16	3.1	94.2	91.31	0.23252	0.52918	0.23048	0.0078	1e-05	1e-05	Ind	3.27661	6.26361	3.57585	74.1758	87.2918	2.70332	4.54985	1.19073	41.3272	49.7711
W076	Tauli	Nepal	27.7	85.3	1.19	3.2	94.4	92	1e-05	1e-05	0.99995	1e-05	1e-05	1e-05	Aus						2.87327	5.48942	1.18512	43.4781	53.0259
W077	79	Guyana	6.46	-58.1	1.1	2.9	94.5	93.72	1e-05	1e-05	1e-05	0.999949	1e-05	1.1e-05	VI						3.49248		2.62653	47.9634
W078	B805D-MR-16-8-3	Indonesia	-6.08	106.45	1.13	3	94.5	91.37	0.056478	0.891935	1e-05	0.051557	1e-05	1e-05	IndII	4.25964	6.12256	4.609	60.0251	75.0163	2.92284	6.22064	4.20434	63.182	76.5298
W079	A 152	Bangladesh	23.51	90.24	1.19	3.2	94	93.07	0.398873	0.041044	1e-05	0.175355	0.384708	1e-05	Admix	3.64349	6.49391	1.47603	54.5666	66.18	2.76321	5.82594	1.22834	36.6121	46.4296
W080	UZ ROS 59	Uzbekistan	41.16	69.13	1.12	3	94.1	91.61	0.99995	1e-05	1e-05	1e-05	1e-05	1e-05	IndI	4.21874	5.93353	2.07257	61.9118	74.1366	4.0899	3.34508	0.867489	41.2186	49.5211
W081	Gasym Hany	Azerbaijan	40.22	49.53	1.17	3.1	93.8	94.22	1e-05	1e-05	1e-05	0.99995	1e-05	1e-05	VI	3.30218	6.67005	2.76314	75.2812	88.0166	3.16251	8.03697	1.83317	45.3664	58.399
W082	Celiaj	Azerbaijan	40.22	49.53	1.03	2.8	93.7	97.26	0.000639	1e-05	1e-05	0.006395	1e-05	0.992936	TeJ						4.45394	7.62653	1.01928	44.8892	57.9889
W083	CNTLR80076-44-1-1-1	Thailand	13.5	100.29	1.15	3.1	93.7	91.42	0.034886	0.965074	1e-05	1e-05	1e-05	1e-05	IndII	2.90018	6.22929	2.45257	57.4132	68.9953	2.73972	5.18227	2.03596	50.5635	60.5214
W084	IR 58614-B-B-8-2	Philippines	14.6	121	1.15	3.1	93.9	91.87	0.087041	0.84658	0.066349	1e-05	1e-05	1e-05	IndII	2.27598	6.92657	1.90937	78.0338	89.1457	3.34802	5.03737	1.74012	52.7399	62.8654
W085	KECHENGNUO NO. 4	China	39.9	116.4	1.19	3.2	95.6	91.96	0.372355	0.618007	0.004186	0.005431	1e-05	1e-05	Ind	4.23097	5.4523	2.74114	61.5382	73.9627	3.59693	4.0715	2.54126	31.1283	41.338
W086	4484	China	39.9	116.4	1.15	3.1	93.7	91.52	0.213585	0.786375	1e-05	1e-05	1e-05	1e-05	IndII	3.46317	4.29515	0.587058	62.5316	70.877	4.36805	5.34829	0.564555	42.1501	52.431
W087	YOU-I B	China	39.9	116.4	1.15	3.1	95	91.65	0.726883	0.212188	1e-05	0.027188	1e-05	0.033721	IndI							6.10643	1.4139	54.468
W088	CHUNJIANGZAO NO. 1	China	39.9	116.4	1.15	3.1	94.9	96.38	1e-05	0.07741	1e-05	0.040008	0.004898	0.877663	TeJ							6.15631	2.46173	57.2146
W089	Egyptian Wild Type	Turkey	40.02	32.54	1.15	3.1	95.2	91.45	0.304716	0.632587	0.035061	0.002796	0.024334	0.000506	Ind	3.55322	7.42385	4.24713	87.0561	102.28	4.1477	4.3095	1.98114	38.4275	48.8658
W090	C.B. II	Japan	35.7	139.8	1.15	3.1	95.1	91.56	1e-05	1e-05	0.99995	1e-05	1e-05	1e-05	Aus	2.08458	5.68003	5.93687	61.124	74.8255	2.52089	3.73362	6.60749	46.6156	59.4776
W091	Gallawa	Sri Lanka	6.55	79.52	1.12	3	95	92.26	1e-05	1e-05	0.85649	0.02726	0.070996	0.045233	Aus		5.91075	5.7637	74.2042		2.54575	3.72703	3.18169	47.6492	57.1037
W092	Karayal	Sri Lanka	6.55	79.52	1.12	3	94.8	92	1e-05	1e-05	0.887462	0.047352	0.065156	1e-05	Aus	1.4768	6.18337	3.92769	65.3339	76.9218	2.11918	3.93895	1.69193	28.457	36.2071
W093	Srav Prapay	Cambodia	11.35	104.55	1.15	3.1	95.2	90.03	0.305778	0.634615	0.033937	0.006572	0.012531	0.006567	Ind						4.02099	5.35461	2.19761	33.3382	44.9114
W094	Nang Bang Bentre	Vietnam	21.03	105.85	1.15	3.1	95.1	91.85	1e-05	1e-05	0.99995	1e-05	1e-05	1e-05	Aus	1.17272	7.96268	5.61038	72.7817	87.5275	1.53788	6.04373	1.42785	45.6269	54.6364
W095	DJ 24	Bangladesh	23.51	90.24	1.14	3.1	94.6	90.3	1e-05	1e-05	0.99995	1e-05	1e-05	1e-05	Aus						1.86632	4.54393	3.33943	37.118	46.8677
W096	DJ 102	Bangladesh	23.51	90.24	1.15	3.1	95.1	91.88	1e-05	1e-05	0.99995	1e-05	1e-05	1e-05	Aus						1.16608	5.05951	2.76785	42.1341	51.1276
W097	Santhi 990	Pakistan	33.4	73.08	1.15	3.1	95.2	90.8	0.018421	0.212307	0.391752	0.093639	0.047317	0.236563	Admix						2.5232	5.53318	3.22172	41.1407	52.4188
W098	UZ ROS 7-13	Uzbekistan	41.16	69.13	1.06	2.8	95.1	84.81	1e-05	1e-05	0.99995	1e-05	1e-05	1e-05	Aus	1.9367	6.51847	5.26923	57.1411	70.8655	2.33819	3.89914	3.80476	37.9549	47.997
W099	SL 22-620	Sierra Leone	8.48	-13.22	1.15	3.1	95	92.29	1e-05	1e-05	0.775571	0.066732	0.088228	0.069449	Aus						1.58303	5.93085	1.9281	33.938	43.38
W100	Spin Mere	Afghanistan	34.5	69	1.17	3.1	95.4	91.8	1e-05	1e-05	0.99995	1e-05	1e-05	1e-05	Aus	1.72509	5.6477	5.42801	41.8672	54.668	0.581272	3.45685	4.84878	37.0657	45.9526
W101	AMANE	Sri Lanka	6.55	79.52	1.15	3.1	95.2	91.24	0.409765	0.405849	0.184348	1e-05	1e-05	1.8e-05	Ind	2.64801	5.18335	7.45908	71.2594	86.5499	3.26771	5.4044	1.88124	38.455	49.0083
W102	Padi Tarab Arab	Malaysia	3.2	101.7	1.13	3	94.4	95.44	1e-05	1e-05	1e-05	1e-05	0.99995	1e-05	TrJ	2.97975	5.75213	2.72106	62.1355	73.5885	1.9259	5.09644	2.43985	48.9783	58.4405
W103	P 35	India	28.6	77.2	1.07	2.9	94.3	91.83	1e-05	1e-05	0.981238	0.017971	1e-05	0.000761	Aus						2.45247	4.85201	1.42687	41.8981	50.6295
W104	CAROLINO 164	Chad	12.1	15.04	1.07	2.9	93.3	91.8	1e-05	1e-05	0.99995	1e-05	1e-05	1e-05	Aus	1.4199	7.29298	5.00989	69.202	82.9247	2.74518	4.01853	2.29661	39.6733	48.7336
W105	HKG 98	Mali	12.4	-7.59	1.03	2.8	94.6	92.58	1e-05	1e-05	0.799424	0.059795	0.11159	0.02917	Aus	1.61767	5.67075	4.05771	59.9628	71.3089	2.21021	4.49229	3.00211	40.3623	50.067
W106	Daudzai Field Mix	Pakistan	33.4	73.08	1.14	3.1	94.5	58.62	1e-05	1e-05	0.99995	1e-05	1e-05	1e-05	Aus	2.76213	5.72203	7.01675	65.6504	81.1514	1.64263	3.10165	5.30319	33.4431	43.4905
W107	JP 5	Pakistan	33.4	73.08	1.17	3.1	94.1	91.5	0.158236	0.276572	0.565162	1e-05	1e-05	1e-05	Admix						1.57346	2.72849	1.6955	45.3732	51.3706
W108	Hi Muke	Kazakhstan	51.1	-71.3	1.14	3.1	94.4	91.66	1e-05	1e-05	0.99995	1e-05	1e-05	1e-05	Aus						2.24773	3.94203	4.29986	45.2289	55.7185
W109	WIR 911	Russian Federation	55.45	37.37	1.16	3.1	95.5	97	1e-05	1e-05	1e-05	1e-05	0.059209	0.940751	TeJ							4.68373	0.637568	41.3941
W110	Lua Chua Chan	Vietnam	21.03	105.85	1.11	3	95	95.32	1e-05	1e-05	1e-05	1e-05	0.99995	1e-05	TrJ						4.0755	4.9232	0.683739	34.7062	44.3887
W111	Sereno	Jamaica	17.58	-76.48	1.05	2.8	95.4	91.67	0.36426	0.577677	0.034109	1e-05	0.023935	1e-05	Ind	1.97118	6.0566	4.24297	59.5572	71.828	2.41702	6.43592	5.64998	49.1136	63.6165
W112	ARC 10633	India	28.6	77.2	1.2	3.2	95.5	91.32	0.319591	0.569814	0.110559	1.6e-05	1e-05	1e-05	Ind						2.03551	5.39671	3.15512	42.8212	53.4085
W113	Simpor	Brunei	4.52	114.55	1.09	2.9	94.6	95.54	1e-05	1e-05	1e-05	1.3e-05	0.979646	0.020311	TrJ						3.20904	5.08146	2.18613	38.5874	49.064
W114	Heo Trang	Vietnam	21.03	105.85	1.12	3	95	91.54	0.34191	0.642086	0.001962	1.2e-05	0.014021	1e-05	Ind	1.71149	5.87971	3.38076	53.7666	64.7385	4.31389	4.51685	4.687	54.7163	68.234
W115	THAVALU	Sri Lanka	6.55	79.52	1.14	3.1	94	91.62	0.020601	1e-05	0.895924	0.038399	0.028955	0.016111	Aus	1.64523	6.02471	4.82721	49.7171	62.2142	2.65981	5.21428	4.34131	41.9529	54.1683
W116	WC 10253	Unknown	NA	NA	1.14	3.1	94.6	96.24	1e-05	1e-05	1e-05	1e-05	0.990359	0.009601	TrJ						2.86751	6.68176	3.83447	53.8101	67.1939
W117	KRASNODARSKIJ 3352	Russian Federation	55.45	37.37	1.13	3	94.4	97.72	1e-05	1e-05	1e-05	1e-05	1e-05	0.99995	TeJ							5.42529	1.43881	51.2401
W118	EMBRAPA 1200	Brazil	-15.45	-47.57	1.01	2.7	94.6	95.29	1e-05	0.020853	1e-05	1e-05	0.974564	0.004554	TrJ	2.31758	6.33333	2.88225	73.0516	84.5848	3.5736	4.95982	1.721	52.8282	63.0826
W119	WAB462-10-3-1	Cote D'Ivoire	6.81	-5.28	1.13	3	94.3	95.51	1e-05	0.050543	1e-05	0.003303	0.946121	1.4e-05	TrJ	2.24822	6.32099	2.77431	60.3323	71.6758	3.00687	6.04549	2.80222	66.5625	78.4171
W120	Bombilla	Spain	40.26	-3.42	1.16	3.1	96.4	97.1	1e-05	1e-05	0.002528	1e-05	0.180902	0.81654	TeJ	1.69282	6.69175	3.39381	66.2455	78.0239	3.40563	6.02423	2.42522	54.0991	65.9542
W121	TCHAMPA	Iran	35.45	51.3	1.13	3	94.3	92.47	0.013095	1e-05	0.977988	0.008887	1e-05	1e-05	Aus	1.93277	6.01748	3.64101	65.0053	76.5965	3.07798	4.56353	1.3012	34.2717	43.2144
W123	WC 3532	Peru	-12.06	-76.55	1.15	3.1	95.6	95.64	1e-05	1e-05	1e-05	1e-05	0.99995	1e-05	TrJ	2.38109	5.52682	4.35579	57.2265	69.4902	2.95338	6.34449	3.55935	53.2133	66.0705
W124	Kin Shan Zim	China	39.9	116.4	1.15	3.1	95.4	92.02	0.915735	0.076829	0.007406	1e-05	1e-05	1e-05	IndI						1.76887	4.30192	2.1701	48.977	57.2178
W125	Yong Chal Byo	Korea, South	39	125.47	1.15	3.1	95.6	94.89	0.397381	1.2e-05	1e-05	1e-05	0.077542	0.525045	Admix						3.38902	5.61269	1.88045	29.8498	40.732
W126	Pan Ju	China	39.9	116.4	1.15	3.1	95.5	92.03	0.99994	1e-05	1e-05	1e-05	1.9e-05	1e-05	IndI	3.87904	6.75123	3.81297	69.4249	83.8681	3.68906	2.97831	0.479888	33.588	40.7353
W127	Buphopa	Myanmar	16.8	96.15	1.15	3.1	95.4	96.05	1e-05	1e-05	1e-05	1e-05	0.689612	0.310348	Jap	3.52262	5.91961	3.45711	57.5106	70.4099	3.93281	6.5798	2.56505	40.9616	54.0393
W128	TAINO 38	Taiwan	25.02	121.38	1.15	3.1	95.3	94.06	0.167649	0.027043	0.148201	1e-05	0.521773	0.135324	Admix	2.1857	6.46946	3.55114	60.0382	72.2445	3.61386	4.45662	2.4844	45.3029	55.8578
W129	2	Afghanistan	34.5	69	1.14	3.1	95.3	94.25	1e-05	1e-05	1e-05	0.893415	0.018845	0.08771	VI	2.46246	7.00522	1.7806	54.0207	65.269	3.02724	4.83794	1.92591	41.8354	51.6265
W130	LUSITANO	Portugal	38.42	-9.05	1.14	3.1	95.4	95.54	1e-05	1e-05	1e-05	1e-05	1e-05	0.99995	TeJ	2.64925	6.30062	2.17649	66.486	77.6123		5.26512	1.43577	51.6903
W131	IARI 6621	India	28.6	77.2	1.15	3.1	95.4	92.22	0.132842	0.0477	0.814142	1e-05	0.005297	1e-05	Aus	1.848		2.33337	45.4691		1.83362	4.99577	2.03482	45.6908	54.555
W132	Hsin Hsing Pai Ku	Taiwan	25.02	121.38	1.15	3.1	95.5	92.12	0.773897	0.214075	0.00229	0.003763	0.003097	0.002878	IndI	2.05363	5.62585	3.66256	65.3577	76.6998	2.88705	5.02328	2.05513	34.186	44.1515
W133	TD 70	Thailand	13.8	100.5	1.15	3.1	95.6	92.08	0.664808	0.329267	0.002603	0.002024	0.001288	1e-05	Ind	2.36848	5.69138	3.35917	58.8007	70.2197	1.31679	5.35359	1.03975	44.5235	52.2336
W134	Dara	Indonesia	-6.08	106.45	1.15	3.1	95.7	91.8	1e-05	1e-05	0.99995	1e-05	1e-05	1e-05	Aus	2.4544	5.21509	3.02174	65.048	75.7392	3.3155	3.5997	1.60772	51.6346	60.1575
W135	Shimla Early	Iraq	33.14	44.22	1.15	3.1	95.8	91.68	0.208426	0.329877	0.422662	0.002284	0.036741	1e-05	Admix						2.76397	4.97196	3.60997	52.4182	63.7641
W136	LA PLATA GENA F.A.	Argentina	-34.62	-54.84	1.08	2.9	95.3	92.7	1e-05	0.109855	0.241022	0.649093	1e-05	1e-05	VI	4.48277		3.22672	68.5416		3.31827	6.50174	3.54663	57.9681	71.3347
W137	CM1, HAIPONG	Vietnam	21.03	105.85	1.15	3.1	95.5	91.77	0.375248	0.549332	0.036262	1e-05	0.030283	0.008865	Ind	1.56749	6.03021	2.55739	57.7098	67.8649	1.85943	5.50905	2.56172	42.2007	52.1309
W138	4595	China	39.9	116.4	1.15	3.1	95.2	91.42	0.850322	0.141891	0.007756	1.1e-05	1e-05	1e-05	IndI	3.19946	7.88846	3.29896	76.4433	90.8301	3.13253	5.32961	1.06998	43.7588	53.291
W139	A 5	Japan	35.7	139.8	1.14	3.1	95.4	97.63	1e-05	1e-05	1e-05	1e-05	1e-05	0.99995	TeJ							5.4202	2.06357	45.8564
W140	Ittikulama	Sri Lanka	6.55	79.52	1.12	3	95.3	92.14	1e-05	1e-05	0.878911	0.046117	0.057727	0.017224	Aus	2.67396	5.70025	4.47984	67.2253	80.0793	3.02398	5.40507	2.16882	34.0273	44.6252
W141	DNJ 179	Bangladesh	23.51	90.24	1.15	3.1	95.6	91.79	1e-05	1e-05	0.999948	1.1e-05	1e-05	1.1e-05	Aus						2.63438	4.11967	3.12944	36.3986	46.2821
W142	DNJ 121	Bangladesh	23.51	90.24	1.15	3.1	95.4	91.85	0.020442	1e-05	0.979518	1e-05	1e-05	1e-05	Aus						2.22023	4.34372		38.6874
W143	Jyanak	Bhutan	27.5	89.7	1.16	3.1	96.3	96.46	1e-05	1e-05	0.007522	0.032933	0.505794	0.453731	Jap	1.63603	4.96535	2.01386	48.5291	57.1443	2.35003	5.01598	3.40117	40.6915	51.4586
W144	Ao Chiu 2 Hao	China	39.9	116.4	1.17	3.1	96.5	92.19	0.96754	0.030342	1e-05	1e-05	1e-05	0.002089	IndI	1.56349	4.49009	0.942957	45.4159	52.4124	2.54671	4.04828	0.903838	41.1816	48.6804
W145	GUYANE 1	Chad	12.1	15.04	1.17	3.1	96.4	92.16	0.589153	0.362051	0.044867	0.003909	1e-05	1e-05	Ind	1.89306	6.00893	2.01689	56.7199	66.6388	3.25651	5.53947	0.555622	36.6248	45.9764
W146	10340	Italy	41.52	12.37	1.16	3.1	96.3	90.93	0.897928	0.09543	0.002878	0.000839	1e-05	0.002914	IndI						2.89274	4.8545	1.78004	38.0126	47.5399
W147	BR11	Bangladesh	23.51	90.24	1.16	3.1	96.3	91.88	0.356506	0.643452	1e-05	1.2e-05	1e-05	1e-05	Ind	2.86897	5.16557	3.34132	51.5981	62.974	3.28217	4.70663	0.83489	45.8762	54.6999
W148	BR24	India	28.6	77.2	1.16	3.1	96.3	91.85	0.692619	0.302996	1e-05	0.001315	0.003051	1e-05	Ind	2.11785	5.1777	2.16565	60.3462	69.8074	2.47173			33.9243
W149	93072	China	39.9	116.4	1.16	3.1	96.3	91.95	0.286336	0.713624	1e-05	1e-05	1e-05	1e-05	IndII						4.24288	4.51459	0.790062	38.092	47.6396
W150	108S	Unknown	NA	NA	1.16	3.1	96.5	91.77	0.159556	0.706601	1e-05	0.02293	0.01045	0.100453	IndII	3.54705	7.26062	4.208	49.7534	64.7691	3.8587	7.06301	4.62551	52.1128	67.66
W151	C418	China	39.9	116.4	1.16	3.1	96.1	92.35	0.171676	0.751164	1e-05	1e-05	0.019435	0.057706	IndII	2.73368	5.28915	0.822497	41.7287	50.574	3.74703	5.5667	1.16519	37.3151	47.7941
W152	CDR22	China	39.9	116.4	1.17	3.1	96.5	92.36	0.022016	0.957013	1e-05	1e-05	0.020941	1e-05	IndII						3.96449	5.38243	1.29827	42.961	53.6062
W153	Chenghui448	Sichuan	30.39	104.05	1.17	3.1	96.5	92.11	0.118566	0.820903	0.005856	1e-05	0.054656	1e-05	IndII	2.60222	4.61239	2.05466	60.9564	70.2257	3.51666	6.09551	0.365513	43.9909	53.9686
W154	Fengaizhan	Guangdong	23.08	113.15	1.17	3.1	96.4	92.21	0.211544	0.788416	1e-05	1e-05	1e-05	1e-05	IndII	3.09546	5.69892	1.88438	55.9876	66.6664	2.58866	4.4865	0.749856	33.2926	41.1176
W155	Gang46B	China	39.9	116.4	1.16	3.1	96.1	92.3	0.402482	0.570192	1e-05	0.001506	1e-05	0.025799	Ind	2.84565	7.42722	2.94866	66.4609	79.6824	2.9471	5.69043	0.478461	36.1861	45.302
W156	Gumei2hao	Sichuan	30.39	104.05	1.16	3.1	96.1	91.91	0.655702	0.332328	1e-05	1e-05	1.4e-05	0.011935	Ind	0.903629	5.87855	1.22458	49.55	57.5567	2.33842	4.68824	0.19232	38.0399	45.2588
W157	Huajingxian74	Guangdong	23.08	113.15	1.16	3.1	96.4	92.38	0.496702	0.471477	1e-05	1e-05	0.031791	1e-05	Ind	0.953008	5.66104	2.59098	58.6317	67.8368	2.57346	5.42142	1.5689	42.867	52.4308
W158	M3122	China	39.9	116.4	1.16	3.1	95.9	94.29	1e-05	0.566669	0.010646	1e-05	1e-05	0.422655	Admix	1.79228	6.7906	3.6245	54.5408	66.7482	3.8783	5.05543	2.39861	29.3023	40.6347
W159	R644	China	39.9	116.4	1.16	3.1	96.1	92.2	0.000262	0.968325	0.02417	1e-05	1e-05	0.007223	IndII	3.07892	7.46777	3.58861	66.7484	80.8837	4.32372	5.62555	1.74573	33.2269	44.9219
W160	Shennong265	Unknown	NA	NA	1.16	3.1	96.2	97.91	1.5e-05	1.6e-05	1e-05	1e-05	1e-05	0.999939	TeJ						4.38596	6.04161	1.60984	37.8076	49.845
W161	Y134	China	39.9	116.4	1.16	3.1	96.5	92.93	1e-05	0.837076	1e-05	1e-05	0.129209	0.033685	IndII	2.61221	4.9994	0.635669	53.5633	61.8106	2.9491	6.34133	0.301211	40.7449	50.3366
W162	Yuanjing7	China	39.9	116.4	1.1	2.9	96.2	97.67	1e-05	0.034779	1e-05	1e-05	1e-05	0.965181	TeJ						2.41075	6.6349	2.34236	45.8026	57.1906
W163	Yuexiangzhan	Guangdong	23.08	113.15	1.14	3.1	94.9	92.11	0.404574	0.595386	1e-05	1e-05	1e-05	1e-05	Ind	2.80973	7.27973	2.24124	69.399	81.7297	3.71414	6.17919	1.05219	49.276	60.2215
W164	Zaoxian14	Unknown	NA	NA	1.13	3	94.4	91.57	0.658083	0.30131	1e-05	0.008009	1e-05	0.032578	Ind						3.29784	6.23015	1.14269	43.4053	54.0759
W165	Zhong413	Zhejiang	30.14	120.09	1.13	3	94.6	91.53	0.392163	0.607797	1e-05	1e-05	1e-05	1e-05	Ind	3.54137	6.66234	2.45245	65.2904	77.9466	3.65324	5.69335	0.68524	40.515	50.5468
W166	Zhongyouzao81	Zhejiang	30.14	120.09	1.13	3	94.5	91.71	0.434275	0.512918	0.003134	0.025055	0.002295	0.022323	Ind	2.24969	4.6106	1.67508	56.0745	64.6099	4.21126	5.38957	1.32347	43.9977	54.922
W167	Zihui100	Anhui	37.51	117.18	1.13	3	94.4	90.03	0.437253	0.514551	1e-05	0.024111	0.004028	0.020046	Ind						3.40285	5.10191	1.42933	44.5654	54.4995
W168	Bg90-2	Brazil	-15.45	-47.57	1.13	3	94.6	90.32	1e-05	0.99995	1e-05	1e-05	1e-05	1e-05	IndII	2.50048		1.96813	43.0446		3.50325	6.1871	3.83152	38.0426	51.5645
W169	IR72	Unknown	NA	NA	1.13	3	94.6	91.3	1e-05	0.99995	1e-05	1e-05	1e-05	1e-05	IndII						1.60436	4.91055	2.33018	52.3866	61.2317
W170	PR106	Pakistan	33.4	73.08	1.13	3	94.4	92.05	1e-05	0.99995	1e-05	1e-05	1e-05	1e-05	IndII	2.3279	4.14295	1.97076	48.8086	57.2502	3.63431	5.38571	2.45339	43.6875	55.1609
W171	TKM9	Philippines	14.6	121	1.13	3	94.6	91.68	0.084898	0.74972	0.160687	0.004673	1e-05	1.2e-05	IndII						2.23964	5.07198	3.02931	42.2642	52.6051
W172	Amo13 (Sana)	Unknown	NA	NA	1.13	3	94.3	90.86	0.216394	0.773056	0.01052	1e-05	1e-05	1e-05	IndII	2.38503	5.55989	1.26246	54.575	63.7824	3.7438	4.03759	1.07586	60.8934	69.7507
W173	Khazar	Iran	35.45	51.3	1.14	3.1	94.6	94.92	0.062753	0.088329	1e-05	0.126995	0.576415	0.145498	TrJ	2.33898	5.27933	1.93886	75.3027	84.8598	3.42326	5.37534	1.54814	39.9719	50.3187
W174	Gayabyeo	Korea	37.35	127.03	1.14	3.1	96	91.79	1.1e-05	0.976165	1e-05	1e-05	1e-05	0.023793	IndII	3.71811	6.48254	2.48887	59.9385	72.628	3.91191	5.59116	1.83114	47.7009	59.0351
W175	Iksan438	Korea	37.35	127.03	1.13	3	94.3	93.97	0.124217	0.497604	0.004407	1e-05	1e-05	0.373752	Admix	2.4626	4.72765	2.76315	47.6691	57.6225	2.72109	6.28939	3.13944	50.3744	62.5243
W176	Milyang23	Korea	37.35	127.03	1.17	3.1	97.7	90.66	1e-05	0.914302	1e-05	1e-05	1e-05	0.085658	IndII	2.50423	4.94339	2.27729	51.754	61.4789	2.75412	7.48643	1.16312	47.064	58.4677
W177	MR185	Malaysia	3.2	101.7	1.17	3.1	97.8	92.92	1e-05	0.914582	1e-05	1e-05	1e-05	0.085378	IndII	3.60783	6.38898	1.9502	51.1458	63.0928	3.26643	6.86393	3.20411	40.6845	54.019
W178	Manawthukha	Philippines	14.6	121	1.17	3.1	97.6	91.97	0.223998	0.764984	0.010988	1e-05	1e-05	1e-05	IndII	4.01907	5.97124	3.17936	54.1428	67.3125	3.38935	6.19773	2.56271	51.202	63.3518
W179	Shwe Thwe Yin Hyv	Myanmar	16.8	96.15	1.17	3.1	97.9	91.7	1e-05	0.99995	1e-05	1e-05	1e-05	1e-05	IndII	2.60602	6.38671	2.96997	57.7634	69.7261	3.28753	3.59544	1.04498	40.1289	48.0568
W180	Bg300	Sri Lanka	6.55	79.52	1.17	3.1	97.7	91.8	0.144182	0.855778	1e-05	1e-05	1e-05	1e-05	IndII	3.36843	8.22254	2.29777	64.5446	78.4334	3.88816	5.2812	3.05636	48.685	60.9107
W181	Bg94-1	Sri Lanka	6.55	79.52	1.17	3.1	97.8	91.64	0.221423	0.778537	1e-05	1e-05	1e-05	1e-05	IndII	3.42921	5.93878	2.16964	58.3655	69.9031	3.16169	4.85939	1.14132	43.6964	52.8588
W182	CR203	Viet Nam	21.03	105.85	1.13	3	94.5	91.65	1e-05	0.99995	1e-05	1e-05	1e-05	1e-05	IndII	3.20847	5.31038	2.47051	55.4226	66.4119	3.68735	5.52157	2.54466	49.1998	60.9534
W183	OM997	VietNam	21.03	105.85	1.13	3	94.5	90.65	1e-05	0.99995	1e-05	1e-05	1e-05	1e-05	IndII						2.43981		1.74176	33.4072
W184	PSB RC 28	Philippines	14.6	121	1.13	3	94.7	90.59	1e-05	0.996304	1e-05	1e-05	0.003656	1e-05	IndII	3.09005	7.27084	3.95963	63.821	78.1415	2.92283	5.06058	3.22214	62.9956	74.2011
W185	PSB RC 66	Philippines	14.6	121	1.14	3.1	94.7	91.11	0.028643	0.971317	1e-05	1e-05	1e-05	1e-05	IndII	3.40263	6.54337	2.92294	61.5057	74.3746	3.22203	6.4884	4.69691	42.0253	56.4326
W186	TEQING	Philippines	14.6	121	1.14	3.1	94.8	92.03	0.345972	0.653988	1e-05	1e-05	1e-05	1e-05	Ind	3.07881	5.8196	0.810208	44.9059	54.6145	2.55542	5.17242	1.16246	38.6025	47.4928
W187	IR68552-55-3-2	Philippines	14.6	121	1.13	3	94.4	91.86	0.392148	0.607812	1e-05	1e-05	1e-05	1e-05	Ind						3.12999	5.78589	0.0853504	36.5716	45.5728
W188	IR66897B	Unknown	NA	NA	1.13	3	94.3	91.53	0.11344	0.865281	0.01021	1e-05	0.011048	1e-05	IndII						2.9241	5.84797	2.54883	34.5408	45.8617
W189	IR58025B	Unknown	NA	NA	1.17	3.1	97	91.79	0.056329	0.943631	1e-05	1e-05	1e-05	1e-05	IndII	3.24117	6.35155	2.4721	47.5016	59.5665	3.33997	4.93573	3.03424	49.2994	60.6093
W191	Pusa (Basmatil)	China	39.9	116.4	1.17	3.1	97	92.86	0.0142	0.532535	1e-05	0.453235	1e-05	1e-05	Admix	4.02992	6.4847	2.62222	58.9794	72.1163	3.91553	7.14252	1.72954	43.8184	56.606
W192	ASD16	India	28.6	77.2	1.17	3.1	97.1	92.73	0.013828	0.53543	1e-05	0.450712	1e-05	1e-05	Admix						3.77814	6.6922	1.88128	35.343	47.6947
W193	Dianjing	Unknown	NA	NA	1.17	3.1	97	97.95	1e-05	0.003686	1e-05	1e-05	0.155918	0.840366	TeJ	1.8915	4.6549	1.45705	43.0434	51.0469	3.6072	5.31095	1.20802	44.7594	54.8856
W194	F6	Japan	35.7	139.8	1.17	3.1	97	91.92	0.137504	0.839566	0.009868	1e-05	1e-05	0.013042	IndII	3.5406	5.08482	3.78736	52.0366	64.4494	4.28315	5.14535		40.3186
W195	452	Unknown	NA	NA	1.17	3.1	96.9	92.31	0.157313	0.767318	1e-05	0.007318	0.031028	0.037013	IndII	3.55663	6.48474	2.49498	47.2342	59.7706	3.93241	5.70807	1.69793	43.8727	55.2111
W197	Ai-Zi-DAO	China	39.9	116.4	1.17	3.1	97.1	91.95	0.058582	0.941378	1e-05	1e-05	1e-05	1e-05	IndII						3.14451	5.44505	3.15618	48.3523	60.0981
W198	Babaomi	China	39.9	116.4	1.16	3.1	96.8	92.02	0.711519	0.276783	0.007368	1e-05	0.00431	1e-05	IndI						4.67151	5.86083	1.50481	27.3372	39.3743
W199	Diantun502	云南	25.04	102.41	1.17	3.1	97	91.95	0.334105	0.660194	0.00567	1e-05	1e-05	1e-05	Ind						3.48928	6.82072	1.21198	46.331	57.853
W200	Heiheaihui	Unknown	NA	NA	1.17	3.1	97	91.96	0.2704	0.72956	1e-05	1e-05	1e-05	1e-05	IndII	3.20653	5.39938	3.00426	82.1192	93.7294	3.91775	6.24388	1.64821	47.5903	59.4001
W201	Jiangxisimiao	江西	28.41	115.52	1.17	3.1	97.1	78.75	0.268378	0.731582	1e-05	1e-05	1e-05	1e-05	IndII	3.22954	6.25614	2.50751	62.9066	74.8998	3.73651	6.35109	1.08065	49.7808	60.9491
W202	Laohudao	浙江	30.14	120.09	1.17	3.1	97	91.89	0.263844	0.736116	1e-05	1e-05	1e-05	1e-05	IndII	3.8183	6.39581	2.38657	69.6313	82.232	2.88172	6.188	0.818451	38.9813	48.8695
W203	Linjintangdao	Unknown	NA	NA	1.17	3.1	97.2	92.01	0.438566	0.561394	1e-05	1e-05	1e-05	1e-05	Ind	1.69024	5.13399	2.08954	56.2202	65.134	2.56058	6.3098	0.470466	33.9744	43.3153
W204	Mengguandamagu	Unknown	NA	NA	1.17	3.1	97.1	89.56	0.99995	1e-05	1e-05	1e-05	1e-05	1e-05	IndI	3.09092		1.54586	61.5244		3.0739	4.10517	1.13391	38.5695	46.8824
W205	Pengshantieganzhan	Unknown	NA	NA	1.17	3.1	97.2	91.56	0.99995	1e-05	1e-05	1e-05	1e-05	1e-05	IndI	2.73052	5.26594	1.33881	53.9784	63.3136	2.85007	4.35897	1.42678	36.7475	45.3834
W206	Wumanggaonuo	Unknown	NA	NA	1.17	3.1	97.2	89.94	0.33653	0.65832	0.005119	1.1e-05	1e-05	1e-05	Ind	2.80803	6.15687	2.94408	56.5184	68.4274	3.72228	4.86752	3.55793	54.4813	66.629
W207	Yunguang8hao	云南	25.04	102.41	1.17	3.1	97.3	97.94	1e-05	1e-05	1e-05	1e-05	0.013675	0.986285	TeJ						3.60891	5.41547	1.45198	41.8146	52.291
W208	Zhongchao123	Unknown	NA	NA	1.13	3	94.6	96.58	1e-05	0.170089	1e-05	1e-05	0.005801	0.82408	TeJ	3.2411	5.54525	2.45503	59.8915	71.1329	2.82277	5.41074	1.49262	47.1554	56.8815
W209	Gizal159	Unknown	NA	NA	1.13	3	94.6	97.54	1e-05	1e-05	1e-05	0.003617	0.131162	0.865191	TeJ	3.45313	6.80249	2.73077	65.1026	78.089	2.71469	6.64959	0.538784	46.7979	56.7009
W210	Khao Daeng	Philippines	14.6	121	1.14	3.1	95	91.75	0.999949	1e-05	1e-05	1.1e-05	1e-05	1e-05	IndI						2.47978	4.92901		38.3123
W211	Basmati370	Philippines	14.6	121	1.14	3.1	95.1	91.5	1e-05	0.99995	1e-05	1e-05	1e-05	1e-05	IndII	2.95875	7.22589	4.26658	77.0498	91.501	2.3578	4.80255	1.93575	39.9421	49.0382
W212	Bhavani	India	28.6	77.2	1.13	3	94.8	91.71	0.634164	0.343902	0.007091	1e-05	0.002464	0.012369	Ind	2.9372	5.98209	1.8514	51.8711	62.6418	4.64641	5.40552	1.59505	34.5905	46.2374
W213	IR50	India	28.6	77.2	1.13	3	95	90.9	0.021582	0.932309	1e-05	1e-05	0.046079	1e-05	IndII	3.30176	6.76646	4.68094	61.3873	76.1365	3.28302	6.82897	3.10259	48.4427	61.6573
W214	Jhona349	Pakistan	33.4	73.08	1.12	3	94.3	89.26	1e-05	1e-05	0.99995	1e-05	1e-05	1e-05	Aus						2.37644	4.05196	0.922338	36.1362	43.487
W215	Karnal Local	India	28.6	77.2	1.13	3	94.7	91.99	1e-05	1e-05	0.99995	1e-05	1e-05	1e-05	Aus						3.33449	4.60157	0.719704	38.0962	46.7519
W216	Type3	India	28.6	77.2	1.14	3.1	94.9	92.28	1e-05	0.968441	1e-05	1e-05	1.3e-05	0.031516	IndII	2.98403	5.37854	3.31319	60.9507	72.6265	3.12217	5.85613	2.79965	44.1451	55.9231
W217	IRAT352	Indonesia	-6.08	106.45	1.13	3	94.7	91.37	0.096669	0.825169	1e-05	0.004781	0.073361	1e-05	IndII	3.74155	6.43438	2.9218	51.9986	65.0964	2.70538	8.02688	2.56797	49.5512	62.8515
W218	TB154E-TB-2	Unknown	NA	NA	1.15	3.1	95.2	91.68	0.092717	0.827609	1e-05	1e-05	0.079644	1e-05	IndII	3.35761	6.08367	3.66939	57.2786	70.3893	3.56692	7.43519	3.878	52.1354	67.0155
W219	Domsiah	Netherlands	52.12	4.52	1.15	3.1	95.4	94.25	1e-05	1e-05	1e-05	0.99995	1e-05	1e-05	VI						3.39871	8.68715	3.29826	54.2192	69.6033
W220	Tarommolai1	Unknown	NA	NA	1.14	3.1	95.2	93.5	1e-05	1e-05	1e-05	0.99995	1e-05	1e-05	VI	3.20675	6.40824	2.24364	55.9512	67.8099	3.23713	7.70154	0.299679	33.9679	45.2062
W221	MR77 (seberang)	Philippines	14.6	121	1.14	3.1	95	89.99	0.106293	0.885124	0.008554	1e-05	1e-05	1e-05	IndII	2.65008	5.56866	2.34471	62.7765	73.3399	3.76935	5.54496	2.98411	45.7391	58.0375
W222	ir6	Pakistan	33.4	73.08	1.14	3.1	94.9	90.93	0.04351	0.947369	1e-05	1e-05	0.009092	1e-05	IndII	2.65669	5.28985	1.50117	58.9503	68.398	2.50586	5.53219	0.298139	36.6211	44.9573
W223	At354	Sri Lanka	6.55	79.52	1.14	3.1	94.8	89.83	0.145495	0.854465	1e-05	1e-05	1e-05	1e-05	IndII						2.51999	4.8612	0.732826	41.8198	49.9338
W224	BG304	Sri Lanka	6.55	79.52	1.14	3.1	94.9	89.37	0.088118	0.911842	1e-05	1e-05	1e-05	1e-05	IndII	2.87829	6.13818	1.59944	54.2091	64.825	3.20205	4.57075	0.512552	41.4364	49.7218
W225	Lemont	Philippines	14.6	121	1.14	3.1	94.8	94.31	1e-05	0.028117	1e-05	1e-05	0.921138	0.050715	TrJ						2.99495	6.15542	0.805785	43.0668	53.023
W226	M401	Philippines	14.6	121	1.14	3.1	95.1	96.22	1e-05	1e-05	1e-05	1e-05	0.347165	0.652795	Jap						4.05253	4.91783	2.73047	46.2458	57.9467
W227	OM1706	Viet Nam	21.03	105.85	1.14	3.1	95.1	91.35	0.111478	0.888482	1e-05	1e-05	1e-05	1e-05	IndII	2.55084	5.13351	1.747	49.9184	59.3497	3.42489	3.83622	1.90204	29.4767	38.6399
W228	OM1723	Viet Nam	21.03	105.85	1.15	3.1	96	91.77	0.050286	0.949674	1e-05	1e-05	1e-05	1e-05	IndII	3.01272	5.51307	2.57971	56.483	67.5885	2.99252	5.11005	0.662806	32.6874	41.4528
W229	X21	Viet Nam	21.03	105.85	1.15	3.1	95.9	90.91	0.050793	0.949167	1e-05	1e-05	1e-05	1e-05	IndII	2.71684	6.86722	1.67106	56.4681	67.7233	4.40401	6.80456	0.900846	37.1371	49.2465
W230	X22	Viet Nam	21.03	105.85	1.15	3.1	96.1	91.93	1e-05	0.99995	1e-05	1e-05	1e-05	1e-05	IndII	3.08753	5.78348	3.1205	69.7315	81.7231	3.39602	5.42956	2.06096	52.2754	63.162
W231	X23	Viet Nam	21.03	105.85	1.15	3.1	96.1	91.81	0.162401	0.837559	1e-05	1e-05	1e-05	1e-05	IndII						3.38879	4.8372	1.07315	45.8346	55.1338
W233	C70	Viet Nam	21.03	105.85	1.16	3.1	96.2	91.57	0.354097	0.645861	1e-05	1e-05	1e-05	1.2e-05	Ind	2.44513	4.11681	1.88989	41.8651	50.3169	3.67211	4.94752	2.41589	42.1678	53.2033
W234	Q5	Viet Nam	21.03	105.85	1.16	3.1	96.3	91.84	0.350396	0.649564	1e-05	1e-05	1e-05	1e-05	Ind	3.384	6.39337	3.06358	54.6368	67.4777	3.49279	4.38476	2.04026
W235	Suiyangnian	Unknown	NA	NA	1.16	3.1	96.3	92.29	0.999949	1e-05	1e-05	1e-05	1.1e-05	1e-05	IndI	3.11863	6.44018	5.86739	45.0261	60.4523	1.72699	3.60151	3.52492	27.2904	36.1438
W236	Pokhreli	Philippines	14.6	121	1.15	3.1	96.1	92.29	1e-05	0.816082	1e-05	1e-05	0.183757	0.000131	IndII	3.43025	6.53488	1.56938	59.0628	70.5973	3.06464	4.85144	1.49248	38.166	47.5746
W237	Govnd	Unknown	NA	NA	1.16	3.1	96.2	90.97	0.006447	0.993513	1e-05	1e-05	1e-05	1e-05	IndII	3.21521	6.03242	0.854699	60.1758	70.2781	2.77439	4.65398	1.70113	35.1856	44.3151
W238	UPR191-66	India	28.6	77.2	1.16	3.1	96	90.53	1e-05	0.999947	1e-05	1e-05	1.3e-05	1e-05	IndII	3.66629	6.29157	1.95192	64.9035	76.8133	3.66502	5.81057	2.76231
W239	ASD18	India	28.6	77.2	1.16	3.1	96.2	92.1	0.229815	0.770145	1e-05	1e-05	1e-05	1e-05	IndII	3.14378	6.10449	1.12598	64.2969	74.6711	3.10667	5.66143	1.13965	51.1303	61.038
W240	TGMS29	India	28.6	77.2	1.16	3.1	96.3	92.26	0.66808	0.301991	1e-05	1e-05	0.020032	0.009876	Ind	3.37734	5.55828	1.55885	60.5363	71.0307	3.21308	5.08232	1.08493	49.4476	58.828
W241	Phalguna	India	28.6	77.2	1.16	3.1	96.2	90.6	0.082793	0.876452	0.040721	1.3e-05	1e-05	1e-05	IndII	2.85087	5.82761	0.630731	50.5408	59.8501	3.471	5.4764	1.18141	39.2507	49.3795
W242	Ajaya	India	28.6	77.2	1.15	3.1	96.1	91.84	0.035966	0.963994	1e-05	1e-05	1e-05	1e-05	IndII	3.06891	6.42593	2.1885	60.0688	71.7522	2.93602	6.61223	1.34888	41.098	51.9951
W243	Dodda	Unknown	NA	NA	1.16	3.1	96.3	92.27	1.1e-05	0.806641	1e-05	1e-05	0.193318	1e-05	IndII	3.53421	5.96169	1.31898	57.2038	68.0187	2.87946	5.84689	1.78613	45.2002	55.7127
W244	Palung 2	Philippines	14.6	121	1.15	3.1	96.1	92.29	1.3e-05	0.808898	1e-05	1e-05	0.191059	1e-05	IndII	3.67938	5.69732	1.82904	66.7625	77.9682	3.35511	5.47035	1.09111	37.9679	47.8844
W245	TKM6	India	28.6	77.2	1.16	3.1	96.2	90.56	1e-05	0.871647	0.008978	0.008852	0.110503	1e-05	IndII						3.28927	3.18495	3.07807	30.1863	39.7386
W246	RUSTYLATE/中413	Unknown	NA	NA	1.16	3.1	96.3	91.99	0.470736	0.529224	1e-05	1e-05	1e-05	1e-05	Ind	2.20317	5.82662	2.32441	42.0225	52.3767	2.57538	4.75625	2.80131	45.2569	55.3898
W247	Yenfangghu	Unknown	NA	NA	1.16	3.1	96.3	92.12	0.999944	1.6e-05	1e-05	1e-05	1e-05	1e-05	IndI	3.09364	6.28193	1.25422	65.0282	75.658	3.56541	4.57421	1.08946	39.7218	48.9508
W248	Heimichut	Unknown	NA	NA	1.16	3.1	96.5	90.93	0.963568	0.016921	1e-05	1e-05	0.013699	0.005792	IndI	2.9831	7.35685	2.66504	74.3623	87.3673	3.43705	5.16682	2.05076	35.054	45.7087
W249	Teksichut	Philippines	14.6	121	1.16	3.1	96.7	97.42	1e-05	1e-05	1e-05	1e-05	0.170561	0.829399	TeJ	3.66392	4.91736	2.18333	55.7622	66.5268	3.04656	5.55414	2.46339	47.4959	58.56
W250	Eiko	Japan	35.7	139.8	1.16	3.1	96.6	97.03	1.8e-05	1e-05	1e-05	2e-05	0.168252	0.83169	TeJ	2.35066	4.6569	2.62752	60.5524	70.1875	3.57906	7.05217	1.93594	40.6543	53.2215
W251	RUBIO	Philippines	14.6	121	1.16	3.1	96.7	94.09	1.4e-05	1e-05	1e-05	1e-05	0.984296	0.01566	TrJ						4.05214	5.60012	2.49999	48.3432	60.4954
W252	SADRI RICE 1	Iran	35.45	51.3	1.16	3.1	96.5	93.17	1e-05	1e-05	1e-05	0.99995	1e-05	1e-05	VI						3.15105	5.79687	1.14486	41.8256	51.9184
W253	Sereendan Kuning	Malaysia	3.2	101.7	1.16	3.1	96.5	95.56	1e-05	1e-05	1e-05	1e-05	0.99995	1e-05	TrJ	1.96658	6.64692	2.9102	77.7605	89.2842	3.42981	5.85966	1.56257	38.2092	49.0612
W254	SAI-BUI-BAO	Viet Nam	21.03	105.85	1.16	3.1	96.3	95.61	1e-05	1e-05	1e-05	1e-05	0.99995	1e-05	TrJ	2.77501	6.07641	3.0023	81.9249	93.7786	3.44016	6.89548	2.46542	37.7367	50.5377
W255	ZIRI	India	28.6	77.2	1.15	3.1	96.2	94.19	1e-05	1e-05	1e-05	0.99995	1e-05	1e-05	VI	2.82927	4.32616	2.71291	67.0421	76.9104	2.65132	4.16282	1.95473	46.964	55.7329
W256	Dacca6	United States	38.54	-77.02	1.16	3.1	96.4	94.55	1e-05	1e-05	1e-05	0.999941	1e-05	1.9e-05	VI	3.09968	4.8071	1.43884	50.5623	59.9079	3.86575	6.36727	1.81125	44.3649	56.4092
W257	Latisai1	Unknown	NA	NA	1.15	3.1	96.1	94.97	0.028858	1e-05	0.072709	1e-05	0.898403	1e-05	TrJ	2.91781	3.1822	1.56815	42.4507	50.1189	3.15463	5.60686	2.07903	36.6898	47.5303
W258	Amareles	Portugal	38.42	-9.05	1.15	3.1	96.3	94.5	1e-05	1e-05	1e-05	0.99995	1e-05	1e-05	VI	1.92175	5.17903	1.77759	69.5047	78.383	4.23576	5.44923	2.45057	33.7511	45.8866
W259	Up15	Japan	35.7	139.8	1.16	3.1	96.5	92.44	1.7e-05	0.819194	1e-05	1e-05	0.180759	1e-05	IndII	3.67609	5.63824	1.71763	66.5113	77.5432	3.93856	5.35227	0.958985	36.6647	46.9146
W260	Uz-Rosz 275	Philippines	14.6	121	1.16	3.1	96.8	95.64	1e-05	1e-05	1e-05	1e-05	0.99995	1e-05	TrJ	2.31997	4.57699	1.49812	50.0064	58.4015	2.55631	5.72919	1.7758	43.5783	53.6396
W261	Ginga	Japan	35.7	139.8	1.16	3.1	96.4	94.51	1e-05	1e-05	0.214895	0.492908	0.292166	1e-05	Admix	4.39832	8.00254	5.74389	80.694	98.8387	4.1649	2.32993	4.45844	42.4769	53.4302
W262	Bintapan	Philippines	14.6	121	1.16	3.1	96.5	92.45	0.991429	1e-05	1e-05	1e-05	0.008531	1e-05	IndI							5.68068	2.39286	56.3696
W263	SADAJIRA-19-303	Unknown	NA	NA	1.16	3.1	96.7	91.31	0.013211	0.977376	1e-05	0.009383	1e-05	1e-05	IndII	3.57861	4.76957	1.78047	66.5463	76.6749	3.12023	5.97805	2.8164	49.3658	61.2804
W264	CHOROFA	Philippines	14.6	121	1.16	3.1	96.7	92.07	0.455443	0.529815	0.011791	1.3e-05	0.002927	1e-05	Ind	4.1909	6.4122	3.57655	61.0487	75.2283	3.15223	7.698	1.24017	49.36	61.4504
W265	La110	United States	38.54	-77.02	1.16	3.1	96.5	91.76	0.014236	0.975657	1e-05	0.010077	1e-05	1e-05	IndII	3.99567	5.98129	1.15205	69.8582	80.9873	2.70861	5.5299	1.40689	38.5903	48.2357
W266	Yunjiang35	Unknown	NA	NA	1.15	3.1	96.1	90.9	0.217283	0.767923	1e-05	0.007891	1e-05	0.006883	IndII	5.33788	5.25477	2.84318	66.3799	79.8157	4.2863	3.54959	1.9184	39.1254	48.8796
W267	Yunhui72	China	39.9	116.4	1.16	3.1	96.6	92.05	0.391103	0.588611	0.01291	0.004682	0.002684	1e-05	Ind	3.3561	5.43995	1.34974	71.2323	81.3781	3.60787	5.90201	1.16548	35.9437	46.6191
W268	Wudadaozhong	Korea, South	39	125.47	1.16	3.1	96.6	91.86	0.492572	0.507388	1e-05	1e-05	1e-05	1e-05	Ind	3.62889		2.65757	55.2961		2.35411	5.91423	1.63283	45.9295	55.8306
W269	IR65600-27-1-2-2	Philippines	14.6	121	1.16	3.1	96.4	92.18	0.346831	0.624074	0.02216	1e-05	0.006916	1e-05	Ind	2.06206	4.03004	0.116922	38.0822	44.2912	3.57909	5.24873	1.68523	38.1414	48.6544
W270	Yetuozai	Unknown	NA	NA	1.15	3.1	96.2	92.13	0.410323	0.589637	1e-05	1e-05	1e-05	1e-05	Ind						3.51089	4.93294	1.36349	43.4028	53.2101
W271	P59279	Unknown	NA	NA	1.16	3.1	96.3	92	0.480121	0.512203	0.000908	0.003623	1e-05	0.003136	Ind	2.99045	5.72122	1.53229	72.6569	82.9009	3.39541	6.31344	0.837352	52.2318	62.778
W272	Tsao wan ching	China	39.9	116.4	1.15	3.1	96	91.18	0.396729	0.588388	0.003271	0.005034	0.006567	1e-05	Ind	3.49034	6.01608	4.55421	64.8274	78.888	3.94243	6.03208	2.10371	41.906	53.9842
W273	Anambae ndanggalasi	Indonesia	-6.08	106.45	1.15	3.1	96.2	95.19	1e-05	1e-05	1e-05	1e-05	0.985591	0.014369	TrJ	4.56265	4.40751	2.36421	83.5596	94.894	3.26817	5.48904	1.77766	55.1362	65.6711
W274	Er chiu ching	China	39.9	116.4	1.15	3.1	96	92.11	0.969208	0.030752	1e-05	1e-05	1e-05	1e-05	IndI								2.41382	52.8713
W275	Heen goda wee	Sri Lanka	6.55	79.52	1.15	3.1	95.9	95.62	1.3e-05	1e-05	1e-05	0.0238	0.976157	1e-05	TrJ	2.98223	5.3663	3.32309	68.1906	79.8623	3.42513	5.91866	2.07828	37.6611	49.0831
W276	Pathma wee	Sri Lanka	6.55	79.52	1.15	3.1	95.9	91.23	0.305284	0.558249	0.136435	1.2e-05	1e-05	1e-05	Ind	2.74317	5.90835	4.4241	60.7325	73.8081	2.12958	4.98266	1.19027	37.3622	45.6647
W277	Lakkhi kajal	Bangladesh	23.51	90.24	1.15	3.1	96.1	91.95	1e-05	1e-05	0.99995	1e-05	1e-05	1e-05	Aus	2.53589	4.24805	5.18901	72.394	84.367	2.27083	5.3953	2.4689
W278	Moisdol	Bangladesh	23.51	90.24	1.15	3.1	95.9	89.92	1e-05	1e-05	0.99995	1e-05	1e-05	1e-05	Aus	2.42637	3.9002	4.34595	71.7721	82.4446	2.56062	4.36837	1.95958	33.5442	42.4328
W279	Jabor sail	Bangladesh	23.51	90.24	1.14	3.1	95.7	88.36	1e-05	1e-05	0.99995	1e-05	1e-05	1e-05	Aus	2.56407	5.20872	6.14741	81.4866	95.4068	1.65806	3.76018	2.82073	38.8085	47.0475
W280	Sada solay	Pakistan	33.4	73.08	1.15	3.1	95.9	91.08	1e-05	1e-05	0.99995	1e-05	1e-05	1e-05	Aus						2.63169	6.06481	1.62517	49.1786	59.5003
W281	Sholay	Pakistan	33.4	73.08	1.14	3.1	95.7	96.48	0.00195	1e-05	0.015007	0.07536	0.099942	0.80773	TeJ						2.02295	5.8509	0.998535	38.5903	47.4627
W282	Ma ba you zhan	China	39.9	116.4	1.15	3.1	96.1	92.2	0.400008	0.583356	0.000329	1e-05	1e-05	0.016287	Ind	2.71285	4.18823	3.148	46.1843	56.2334	3.88592	4.83972	2.95828	44.9188	56.6027
W283	Daegujo	Korea, Republic of	37.35	127.03	1.15	3.1	95.8	97.61	1.1e-05	1e-05	1e-05	1.1e-05	1e-05	0.999949	TeJ						4.79491	5.10496	1.9735	62.0069	73.8802
W284	Paikasa	Malaysia	3.2	101.7	1.15	3.1	96	95.61	1e-05	1e-05	1e-05	1e-05	0.999356	0.000604	TrJ						3.58448	6.64941	3.63498	48.5837	62.4525
W285	Uwi	Indonesia	-6.08	106.45	1.16	3.1	96.3	95.08	1e-05	1e-05	1e-05	1e-05	0.974673	0.025287	TrJ						3.27037	7.67528	2.98949	51.8223	65.7574
W286	Garia	Bangladesh	23.51	90.24	1.14	3.1	94.2	89.83	1e-05	1e-05	0.99995	1e-05	1e-05	1e-05	Aus	2.86662	4.65099	4.26755	40.6012	52.3864	2.18345	3.78296	4.17143	28.2685	38.4063
W287	AUS 449	Bangladesh	23.51	90.24	1.14	3.1	94.3	91.89	1e-05	1e-05	0.99995	1e-05	1e-05	1e-05	Aus	2.89425	4.08776	2.57103	60.8529	70.406	2.64721	4.47716	3.28617	50.8026	61.2131
W288	Dourado Precoce	Brazil	-15.45	-47.57	1.15	3.1	96.1	95.92	1e-05	1e-05	1e-05	1e-05	0.99995	1e-05	TrJ	4.18222	5.76619	3.48472	93.2733	106.706	2.78319	4.96879	2.06171	43.5118	53.3254
W289	IR 661-1-140-3-117	Philippines	14.6	121	1.15	3.1	95.8	92.01	1e-05	0.99995	1e-05	1e-05	1e-05	1e-05	IndII						2.29929	5.50702	3.21219	41.1114	52.1299
W290	Aichi Asahi	Japan	35.7	139.8	1.15	3.1	96.5	97.79	1e-05	1e-05	1e-05	1e-05	1e-05	0.99995	TeJ						3.61634	4.60245	1.70623	30.2306	40.1556
W291	IR 2071-625-1-252	Philippines	14.6	121	1.15	3.1	95.7	91.09	1e-05	0.99995	1e-05	1e-05	1e-05	1e-05	IndII	3.33682		3.02898	76.7143		4.80158	7.1047	1.61301	31.5741	45.0934
W292	Khoia boro	Bangladesh	23.51	90.24	1.14	3.1	95.6	92.1	1e-05	1e-05	0.99995	1e-05	1e-05	1e-05	Aus	2.59777	4.60512	6.03606	67.2356	80.4746	3.05811	4.72543	4.80648	50.3602	62.9503
W293	IR 8	Philippines	14.6	121	1.15	3.1	95.7	91.88	0.007263	0.992697	1e-05	1e-05	1e-05	1e-05	IndII	3.09283	4.71985	1.0339	58.4254	67.272	4.05882	6.00865	1.32839	37.5083	48.9042
W294	LABELLE	United States	38.54	-77.02	1.14	3.1	95.4	93.38	1e-05	0.579421	1e-05	1e-05	0.420539	1e-05	Admix	3.3963	3.63664	1.77036	41.1194	49.9227	2.68114	6.94022	2.80818	39.9448	52.3743
W295	LEBONNET	United States	38.54	-77.02	1.14	3.1	95.5	91.73	1e-05	0.99995	1e-05	1e-05	1e-05	1e-05	IndII	2.4578	5.74763	3.38926	78.0943	89.689	2.50054	5.57753	2.90844	40.8286	51.8151
W296	AUS 371	Bangladesh	23.51	90.24	1.14	3.1	95.5	92.34	0.027851	1e-05	0.972109	1e-05	1e-05	1e-05	Aus	2.58231	6.33021	2.69232	64.9882	76.5931	2.4231	4.69629	1.23781	40.873	49.2302
W297	AUS 373	Bangladesh	23.51	90.24	1.14	3.1	95.5	91.9	0.023721	1e-05	0.976239	1e-05	1e-05	1e-05	Aus						1.772	5.35318	1.69583	44.5472	53.3682
W298	IR 36	Philippines	14.6	121	1.14	3.1	95.2	91.41	1e-05	0.99995	1e-05	1e-05	1e-05	1e-05	IndII	3.73741	6.60621	3.82249	74.4565	88.6226	3.13848	8.14869	3.62297	49.286	64.1962
W299	JAYA	India	28.6	77.2	1.14	3.1	95.6	91.87	0.422847	0.562467	0.012164	0.002502	1e-05	1e-05	Ind	4.0044	7.19931	1.64547	90.7143	103.563	3.36939	3.87614	0.544919	39.5913	47.3818
W300	NEW BONNET	United States	38.54	-77.02	1.14	3.1	95.5	95.43	1e-05	1e-05	1e-05	0.012941	0.987019	1e-05	TrJ	2.88583	5.8554	2.37955	52.6316	63.7523	3.54107	6.38564	2.12096	46.8063	58.8539
W301	IR 64	Philippines	14.6	121	1.14	3.1	95.6	91.81	1e-05	0.99995	1e-05	1e-05	1e-05	1e-05	IndII	2.79197	6.99282	2.89412	70.2805	82.9594	4.34688	5.97947	2.15235	39.9105	52.3892
W302	KUNTLAN	Indonesia	-6.08	106.45	1.14	3.1	95.6	94.94	0.046444	0.034527	1e-05	0.052035	0.769378	0.097606	TrJ	4.14762	6.75777	2.0838	64.4058	77.395	4.73905	7.56551	2.94668	45.9652	61.2164
W303	British Honduras Creole	Belize	17.25	-88.46	1.16	3.1	96.4	95.06	1e-05	1e-05	1e-05	1e-05	0.99995	1e-05	TrJ						3.22344	4.83161	1.45984	34.6145	44.1294
W304	CPSLO 17	United States	38.54	-77.02	1.14	3.1	95.6	93.97	1e-05	0.364416	0.021375	1e-05	0.609545	0.004644	Admix	3.54261	6.94843	1.02795	59.1295	70.6485	4.15092	6.29707	0.856776	45.2021	56.5068
W305	AKITAKOMACHI	Japan	35.7	139.8	1.14	3.1	95.6	97.5	1e-05	1e-05	1e-05	1.3e-05	1e-05	0.999947	TeJ						3.55883	6.43766	1.51066
W306	BASMATI 385	Pakistan	33.4	73.08	1.14	3.1	95.7	92.34	0.025489	0.225062	0.094309	0.65512	1e-05	1e-05	VI	4.5262	7.45963	2.44737	87.4296	101.863	4.57944	6.67236	3.59548	56.023	70.8703
W307	AGNO (PSBRC28)	Philippines	14.6	121	1.14	3.1	95.6	91.4	1e-05	0.99995	1e-05	1e-05	1e-05	1e-05	IndII	3.37058	6.22302	2.92286	70.4733	82.9897	2.53041	5.3338	2.21814	56.8243	66.9067
W308	PSBRC82	Philippines	14.6	121	1.15	3.1	95.9	91.59	1e-05	0.992383	0.007577	1e-05	1e-05	1e-05	IndII	3.74198	6.04146	1.62457	60.8121	72.2201	2.50894	5.24022	2.17725	45.1998	55.1262
W309	NSICRC122	Philippines	14.6	121	1.15	3.1	95.8	91.86	0.01484	0.98512	1e-05	1e-05	1e-05	1e-05	IndII	2.3175	6.18588	0.936541	47.1591	56.599	2.0805		2.0339	50.2676
W310	BRRI DHAN 29	Bangladesh	23.51	90.24	1.15	3.1	95.9	91.58	0.020558	0.979402	1e-05	1e-05	1e-05	1e-05	IndII	3.31353	6.5254	1.57274	62.2173	73.629	2.93711	4.63738	2.30468	47.1262	57.0054
W311	PR 116	Punjab	29.3-32.32	73.55-76.5	1.14	3.1	94.3	91.35	0.089442	0.910518	1e-05	1e-05	1e-05	1e-05	IndII	2.96418	5.74023	1.27757	73.0869	83.0689	3.01853	5.31548	1.61393	48.3877	58.3357
W312	CIGEULIS	Indonesia	-6.08	106.45	1.14	3.1	94.4	90.65	0.008183	0.991777	1e-05	1e-05	1e-05	1e-05	IndII	2.93667	6.3053	3.25901	77.0343	89.5353	2.80839	6.66533	1.31128	33.0639	43.8489
W313	OM 2517	Viet Nam	21.03	105.85	1.14	3.1	94.4	91.47	1e-05	0.99995	1e-05	1e-05	1e-05	1e-05	IndII	3.17888	7.02415	3.02316	75.854	89.0802	2.88401	5.59645	1.92094	42.3607	52.7621
W314	BRRI DHAN 28	Bangladesh	23.51	90.24	1.15	3.1	94.7	89.77	0.053435	0.946525	1e-05	1e-05	1e-05	1e-05	IndII	3.28906	7.54275	4.23265	76.2554	91.3198	3.72259	5.79237	1.96538	47.4379	58.9183
W315	CIBOGO	Indonesia	-6.08	106.45	1.14	3.1	94.4	91.25	1e-05	0.99995	1e-05	1e-05	1e-05	1e-05	IndII	1.16172	6.05199	3.03368	52.2159	62.4633	2.86435	5.56936	2.48016	45.7372	56.651
W316	NEDA	Iran, Islamic Republic of	35.45	51.3	1.14	3.1	94.4	90.29	0.085658	0.839265	0.011803	0.039126	0.024138	1e-05	IndII						1.98008	6.47611	2.61725	49.7645	60.8379
W317	CIHERANG	Indonesia	-6.08	106.45	1.14	3.1	94.2	91.35	1e-05	0.99995	1e-05	1e-05	1e-05	1e-05	IndII	2.04207	5.9313	3.39312	59.2708	70.6373	2.91812	6.26289	2.45797	43.1095	54.7485
W318	Qiuqianbai	Anhui	37.51	117.18	1.14	3.1	94.4	92.06	0.956486	0.016873	1e-05	1e-05	1e-05	0.026611	IndI	2.91425	5.36178	4.65637	74.0263	86.9587	3.14157	4.76526	4.49863	39.2161	51.6216
W319	Guangkexiangnuo	Guangxi	22.48	108.2	1.14	3.1	94.3	97.06	1e-05	1e-05	1e-05	1e-05	1.3e-05	0.999947	TeJ						5.75601	4.36467	1.58013	38.2233	49.9241
W320	Wenxiangnuo	Yunnan	25.04	102.41	1.13	3	94.1	91.53	0.582443	0.398961	0.013163	0.001443	0.003	0.000989	Ind						5.62137	2.38713	4.5632	52.4378	65.0095
W321	Laozaogu	Yunnan	25.04	102.41	1.14	3.1	94.3	91.3	0.36243	0.634677	0.002863	1e-05	1e-05	1e-05	Ind	3.01178	6.0308	5.26341	53.4447	67.7507	2.45219	5.32812	5.64888	44.7327	58.1619
W322	Lengshuinuo	Yunnan	25.04	102.41	1.14	3.1	94.3	88.18	0.503681	0.463737	1e-05	1e-05	0.019514	0.013049	Ind	2.39869	6.36315	0.254539	45.1588	54.1751	3.6068	4.72848	1.6571	40.8331	50.8255
W323	Feienuo2	Guizhou	26.35	106.42	1.14	3.1	94.4	96.32	1e-05	1e-05	1e-05	1e-05	0.585279	0.414681	Jap						4.59487	6.84301	3.61336	51.1311	66.1823
W324	Zimangfeie	Guizhou	26.35	106.42	1.13	3	94	96.61	1.7e-05	1.1e-05	1e-05	1e-05	0.423665	0.576286	Jap						6.03773	2.86874	1.93579	42.4771	53.3194
W325	Guantuibaihe	Guizhou	26.35	106.42	1.14	3.1	94.5	96.77	0.000668	1e-05	1e-05	0.007661	0.018158	0.973493	TeJ	6.39474		3.54026	45.4214		4.30506	5.59622	2.76094	27.3859	40.0481
W326	Haolvguangnian	Guizhou	26.35	106.42	1.13	3	94.1	96.41	1.6e-05	2e-05	1e-05	1e-05	0.416989	0.582955	Jap						5.52431	3.04438	1.24968	32.2189	42.0373
W327	JinghuB	Anhui	37.51	117.18	1.14	3.1	94.3	97.04	1e-05	1e-05	1e-05	1e-05	1e-05	0.99995	TeJ	2.83822	6.15629	1.33411	39.9488	50.2774	4.18163	6.45971	1.64159	32.7761	45.0591
W328	Sibeitichao6	Beijing	39.9	116.4	1.14	3.1	94.2	94.55	0.351808	0.035656	1e-05	0.007942	0.033089	0.571494	Admix						4.67563	5.48902	2.51893	54.7798	67.4634
W329	GPNO 5055	United States	38.54	-77.02	1.16	3.1	96.4	95.05	0.126875	1e-05	1e-05	1e-05	0.794694	0.078401	TrJ	3.97402	6.15817	0.909979	48.1964	59.2385	3.9441	5.05877	0.190225	39.6948	48.8879
W330	ASWINA 330	Bangladesh	23.51	90.24	1.16	3.1	96.3	91.59	0.000627	1e-05	0.999333	1e-05	1e-05	1e-05	Aus						2.79709	4.16099	3.21919	45.299	55.4763

## Sheet: Sheet2
		2014EZ					2015WH
ID	Subpopulation	Alb	Glo	Pro	Glu	Total	Alb	Glo	Pro	Glu	Total
C001	IndI	2.40735	6.8511	4.29099	65.4316	78.9811	3.20209	5.31674	1.7755	30.3615	40.6558
C002	VI	2.84513	6.06414	2.49903	54.4029	65.8112	3.52122	5.57995	2.54851	52.4439	64.0936
C003	Jap						3.00648	6.50747	2.11765	48.6462	60.2778
C004	TeJ						2.56394	4.53196	1.3264	35.3587	43.781
C005	TrJ						3.67561	6.28464	1.82934	43.1368	54.9264
C006	Ind						3.17293	4.27106	1.56526	41.4397	50.4489
C007	Ind	2.00464	4.94258	1.96502	49.6139	58.5262	3.21017	4.51328	0.897341	44.9813	53.6021
C008	IndII						4.87401	5.78942	2.88069	54.1027	67.6468
C009	Ind						2.61157	4.81058	0.895662	26.1581	34.4759
C010	TrJ	2.36635	6.79245	1.48311	54.5425	65.1844	4.12792	6.50408	2.69925	50.4641	63.7954
C011	IndII	3.53117	4.1062	1.88646	56.8665	66.3904	2.56984	7.03167	3.43124	52.6923	65.7251
C012	TeJ	4.16748	5.37903	3.0346	60.0488	72.6299	3.50294	4.74127	2.52128	57.0484	67.8139
C013	Aus	3.79176	5.86871	2.47422	73.5147	85.6494	3.7794	6.07109	1.17594	36.4786	47.505
C014	Jap						3.59868	6.15354	1.46857	49.6716	60.8924
C015	Aus	3.25861	5.94381	5.22313	77.608	92.0336	1.75566	5.22321	3.20278	46.3449	56.5266
C016	TeJ							5.66566	2.09621	37.5086
C017	TeJ	2.31638	6.29618	1.22264	48.7383	58.5735		5.02342	2.02424	44.0306
C018	TeJ							5.61031	2.39131	55.9098
C019	IndI							5.97931	1.93942	52.4516
C020	IndI	2.3958	6.8058	1.94557	72.7203	83.8675		6.06002	1.37271	56.6269
C021	IndI	2.29098	5.66583	4.78583	73.4771	86.2197		5.56134	3.44892	51.0896
C022	IndI	3.11025	6.84528	1.98859	58.4791	70.4232		5.5742	2.03303	56.6901
C023	TeJ	3.23465	5.8438	1.77466	55.5799	66.4331	3.89065	6.0033	1.54229	60.1727	71.6089
C024	IndI						3.53181	6.02913	2.18668	61.1264	72.874
C025	IndII	4.04274	5.1188	4.06808	75.4409	88.6705	4.3327	6.51294	2.76124	46.1831	59.79
C026	TeJ						3.43399	5.66492	1.01843	44.1387	54.2561
C027	Ind	2.22114	4.99358	1.31813	52.4989	61.0317	2.83671	5.34793	1.61563	46.7146	56.5149
C028	TeJ	2.48115	5.41284	2.2259	40.2557	50.3755	3.9026	6.43644	2.5948
C029	Jap						3.65648	5.72003	1.6839	54.9938	66.0542
C030	Ind	3.05538	5.26025	1.25354	42.7672	52.3363	4.7622	5.27955	1.68754	39.2554	50.9847
C031	Ind	3.14518	5.37858	0.827999	51.9313	61.283	4.14158	4.50837	1.35072	43.34	53.3407
C032	TeJ							5.88306	0.421687	60.2968
C033	IndI	3.68487	5.51867	1.30634	71.1229	81.6327	3.40262	5.2318	0.460754	44.855	53.9502
C034	TeJ	2.48589	6.45558	3.09363	54.7651	66.8002	3.46343	6.50382	1.74129	43.4748	55.1833
C035	TeJ						3.83898	5.64917	1.41729	63.8563	74.7618
C036	IndI	2.13379	5.24923	2.73818	34.4153	44.5365	4.05598	3.86176	1.77475	41.394	51.0865
C037	IndI	2.19897	7.34396	1.09424	58.9101	69.5473	3.54162	3.83664	0.203571	45.8091	53.3909
C038	Ind	2.58404	6.3009	2.66387	57.738	69.2868	4.01986	5.75198	6.10407	50.4706	66.3466
C039	IndI	2.20041	5.8366	0.233778	55.9831	64.2539	3.54643	3.05283		41.1946
C040	IndI	2.38366	5.30021	0.657556	58.263	66.6045	2.79264	5.83205	0.0960382	33.7185	42.4392
C041	IndI	2.94146	5.68923	0.598811	54.5761	63.8056	5.00312	4.45178	0.718727	44.7207	54.8943
C042	Ind	2.54967	6.04215	0.873631	58.5725	68.038	3.50499	3.26511	0.672373	25.1958	32.6383
C043	Ind	2.07468	5.9298	0.575604	52.8131	61.3932	1.73901	6.38791	1.25911	46.1257	55.5117
C044	IndII	2.05998	6.13042	2.99794	49.6203	60.8086	2.28284	4.57016	1.78541	41.9308	50.5692
C045	IndII	2.91842	3.64058	3.40715	53.4357	63.4019	4.39897	4.59354	3.3618	42.758	55.1123
C046	Ind	2.9473	4.14393	3.30575	65.0694	75.4664	3.95434	5.16419	1.67955	42.9449	53.7429
C047	IndI	2.6824	4.65054	1.24966	56.2884	64.871	2.54182	4.35828	0.588052	44.3706	51.8588
C048	TeJ	3.05983	5.95066	2.19752	54.395	65.603	2.80776	4.9236	1.42399	41.1638	50.3191
C049	IndII	1.14417	5.82847	0.666322	50.849	58.488	1.84158	5.27646		42.7411
C050	IndII	2.18628	5.18751	0.686462	49.9261	57.9864	3.48066	5.60831	1.23292	40.9272	51.2491
C051	Admix	4.5725	5.16929	1.96088	62.7285	74.4311	3.37816	6.55601	1.83338	39.8874	51.655
C052	TeJ						3.27409	5.37298	1.5694	43.0353	53.2518
C053	Ind	3.681	6.39599	3.46134	61.546	75.0843	4.0989	5.45781	1.59065	48.0567	59.2041
C054	TeJ	2.84326	4.28474	1.35859	41.3387	49.8253	3.98473	5.92857	3.00678	48.2688	61.1889
C055	IndI							6.12004	1.11863	48.6549
C056	TeJ						4.51364	5.61844	1.77612	58.117	70.0252
C057	Jap	4.92403	7.20142	1.82097	73.4204	87.3668	4.00374	2.86525	1.08277	34.4121	42.3639
C058	IndI	2.09075	5.28384	0.0529346	61.4305	68.858	3.0375	6.99303	0.301256	41.7966	52.1284
C059	IndI	1.93186	5.70665	0.331173	60.2514	68.2211	2.99593	4.6718	0.542596	49.6544	57.8647
C060	IndI						1.46112	5.10592	2.28678	35.7432	44.597
C061	IndII	3.53297	5.44771	2.90784	64.2981	76.1867	2.8674	6.48738	1.93734	33.1469	44.4391
C062	IndI	1.70735	5.67429	0.470302	54.6796	62.5316	3.20042	5.2274	0.670552	40.571	49.6693
C063	TeJ	4.1731	6.30698	1.77781	55.1588	67.4167	2.65482	5.49227	0.939203	33.5024	42.5887
C064	TeJ	4.89493	6.85712	2.56393	56.9352	71.2512	3.39558	6.10914	2.12015	43.1269	54.7518
C065	Ind						3.58447	3.96771	2.63737	44.8128	55.0024
C066	IndI	1.97001	6.78158	2.99151	45.5006	57.2437	3.394	4.6993	2.80782	50.1634	61.0645
C067	TeJ	2.06063	6.22407	1.16242	48.5251	57.9722	2.86394	4.66067		40.3819
C068	IndII	2.1352	5.57967	2.84595	47.2545	57.8153	2.59565	5.23769	2.55397	40.1789	50.5662
C069	IndII	2.74343	4.46409	1.66262	49.7668	58.637	3.53705	5.87109	1.21058	32.3537	42.9724
C070	TeJ	2.3715	7.48363	2.18871	53.4022	65.446	3.90496	6.98025		46.837
C071	TeJ	2.82496	5.27032	0.474298	38.3508	46.9204	2.48346	6.87411	0.787638	33.6673	43.8125
C072	IndI	1.91859	7.22864	2.63382	69.019	80.8001	3.33088	1.53029	0.101065
C073	IndI	2.51115	6.40427	0.974929	68.5774	78.4677	2.15135	5.7348	1.14668	34.6371	43.6699
C074	TeJ						5.31683	5.59753	0.966683	41.4019	53.2829
C075	TeJ	4.09914	6.71369	2.47919	58.7135	72.0056	1.35166	6.07033	0.810032	42.4575	50.6895
C076	IndI	1.79772	5.9924	2.93321	48.4794	59.2027	4.09324	4.47129	1.66878	36.4874	46.7207
C077	IndI	2.1232	5.40997	2.38318	56.3234	66.2397	2.77103	5.04511	1.45111	36.4492	45.7164
C078	IndI	1.7345	6.44406	2.20115	62.3537	72.7334	2.69609	5.85042	0.760523	37.8251	47.1321
C079	TeJ	5.22754	5.32959	3.03531	61.739	75.3314	4.37913	2.76868	2.18625	42.7166	52.0507
C080	IndI	2.40284	4.98625	1.4721	61.1538	70.015	2.33335	3.95124	0.65457	41.8855	48.8247
C081	IndI	3.45037	6.0375	3.44288	69.5749	82.5057	3.76	4.17548	1.06415	39.8301	48.8297
C082	TeJ						4.12346	5.04244	2.1195	51.0133	62.2987
C083	TeJ	6.42442	7.27791	3.55928	71.2943	88.5559	4.40227	4.19059	0.848319	39.9765	49.4176
C084	Jap	4.86155	6.84008	4.18474	67.1173	83.0037	4.57722	6.49001	0.845958	38.0961	50.0093
C085	Jap						4.46546	6.00023	2.38027	39.8267	52.6727
C086	Aus	1.49155	4.0691	2.37466	46.3568	54.2921	2.70728	4.25023	1.96883	32.8754	41.8018
C087	TeJ	3.87738	5.90045	2.80524	63.0127	75.5958	4.33281	5.98812	2.33312	38.2638	50.9179
C088	IndI						2.98004	5.14394	3.85337	50.6248	62.6022
C089	TeJ	2.94556	5.76622	3.86217	64.1794	76.7533	3.0907	7.53097	2.50827	48.0005	61.1305
C090	IndII	2.44292	3.06286	5.64157	50.917	62.0644	3.69094	4.42011	4.56928	33.404	46.0844
C091	IndI	2.43429	4.21641	3.01543	53.3399	63.0061	3.15344	5.16291	1.61505	27.7956	37.727
C092	IndI	3.39897	6.28424	4.02783	64.5174	78.2285	2.84343	5.8228	2.77744	33.981	45.4247
C093	TeJ	5.66277	6.53496	3.90735	77.6955	93.8006	4.71542	4.52428	2.85023	49.8696	61.9596
C094	Ind	4.79297	6.29989	4.43693	72.9293	88.4591	2.51863	5.2547	1.12829	27.7997	36.7014
C095	IndI	2.25886	4.76449	6.7998	46.0477	59.8708	2.80707	3.74539	5.86082	48.9533	61.3666
C096	Ind	2.39757	6.18911	7.85334	42.1297	58.5698	3.00768	4.36197	5.46912	52.1757	65.0145
C097	Ind	3.65899	5.68352	4.23749	66.7929	80.3729	2.65201	5.55967	3.8576	42.9123	54.9816
C098	Ind	3.02166	5.81012	5.88865	51.6942	66.4146	3.3444	6.03086	6.75056	43.8248	59.9506
C099	Ind	2.83735	5.48619	2.67944	57.6965	68.6995	3.00015	6.54962	4.16749	52.7953	66.5125
C100	Ind	2.47114	6.29983	5.14367	53.43	67.3446	3.29438	5.79563	3.988	34.7715	47.8495
C101	TeJ	6.88995	6.81618	4.36929	66.9653	85.0407	4.70669	4.36804	2.52868	51.3111	62.9145
C102	Ind	3.76442	6.05594	6.93099	52.4692	69.2206	3.10154	3.27924	4.18183	44.125	54.6876
C103	TeJ	6.74078	7.69836	3.26219	53.7439	71.4452	4.53234	4.2847	1.84249	42.8887	53.5483
C104	IndI	2.31692	2.1189	0.722981	47.979	53.1378	2.55871	5.34647	0.409901	31.5611	39.8762
C105	Ind						0.470799	5.12523	3.23839	40.1791	49.0135
C106	TeJ	3.72622	4.97193	3.47473	57.8733	70.0461	3.807	4.17518	2.04412	30.7409	40.7672
C107	Ind	2.50347	3.62387	5.8827	50.3951	62.4051	3.16377	4.76395	6.7876	37.0647	51.78
C108	IndI	1.43306		0.838806	54.0416		2.88974	3.7705	0.468663	35.9704	43.0993
C109	IndI	1.64782	4.17146	7.13289	65.1888	78.141	4.56166	5.3933	4.77564	32.8797	47.6103
C110	IndI						1.74721	3.34471	2.04502	25.5979	32.7349
C111	TeJ						5.09121	5.51955	4.68157	61.1952	76.4876
C112	IndI	2.16063	6.34849	2.97261	48.2645	59.7462	4.11468	5.11126	1.94342	41.7524	52.9218
C113	Ind	2.29408	7.13601	3.67484	66.7363	79.8412		5.75691	3.43662	65.0109
C114	Ind	2.68589	5.32824	4.40551	66.1436	78.5633		5.53806	4.10632	42.8801
C115	IndII	2.36933	5.04893	3.95151	55.113	66.4828	4.64134	5.66942	2.95827	48.2483	61.5173
C116	TeJ	4.44005	5.21351	2.094	53.4515	65.1991	4.35017	1.7468	2.04212	44.2132	52.3523
C117	Ind	2.52897	5.3799	2.45625	53.0805	63.4456	2.96194	6.49988	0.628923	46.6184	56.7091
C118	IndII	2.15927	5.68874	1.54612	54.8194	64.2135	4.48317	5.52217	1.21902	39.55	50.7743
C119	TeJ	5.00444	5.4992	1.82951	66.1114	78.4445	3.06586	6.13985	1.1878	47.2385	57.6321
C120	TeJ	2.14405	4.94403	2.56036	56.8907	66.5391	4.49666	4.92516	1.75654	61.757	72.9354
C121	Ind	1.39633	2.32504	0.600359	39.7361	44.0578	3.64165	4.81897	1.02347	35.8997	45.3838
C122	IndI						3.43827	4.67492	0.922619	43.1611	52.1969
C123	TrJ	2.74423	4.20861	1.22148	48.2496	56.4239	3.39871	6.51133	3.30914
C124	Ind	2.29174	5.11896	2.41415	59.4336	69.2585	3.40362	5.50841	0.811678	45.079	54.8027
C125	IndI	2.75195	5.57188	6.53519	51.6758	66.5348	2.59624	2.74126	3.58415
C127	IndI	2.59237	5.76564	1.55237	55.2435	65.1539	2.54448	3.92897	1.67662
C128	IndI	2.72009	5.22404	2.97733	50.7104	61.6319	2.8267	6.56221	2.04995	39.2282	50.667
C129	Ind	3.13589	4.36095	3.2647	54.2276	64.9892	2.89072	4.40375	3.80755	36.607	47.709
C130	TeJ	4.51932	5.14901	2.53119	66.9798	79.1794	3.23702	5.49977	1.76796	53.4407	63.9454
C131	IndI						1.99976	4.29162	4.42511	41.9636	52.6801
C132	Ind	2.98708	4.41983	2.41523	42.8173	52.6394	5.40681	3.65014	1.71132	40.1974	50.9657
C133	TeJ	3.02006	5.56723	2.55839	58.0855	69.2312	4.2462	6.50425	0.849613	33.9664	45.5664
C134	TeJ	2.94259	4.87845	6.31556	50.7914	64.9281	1.94112	7.18907	2.65495	45.2213	57.0064
C135	IndI	2.81371	5.17876	0.236338	59.1342	67.363	3.94329	5.12482	0.845428	40.8096	50.7231
C136	IndI	1.19049	4.83185	0.659574	59.2729	65.9548	2.83018	4.16181	0.630205	41.8614	49.4836
C137	TeJ	2.69799	4.7426	2.94818	69.6094	79.9982	4.72328	4.73297	2.06482	38.9587	50.4797
C138	TeJ	1.6552	4.69037	3.56401	54.2407	64.1503
C139	IndI	1.18783	3.89876	2.39009	53.8488	61.3255	3.29405	6.55265	4.05974	47.2445	61.1509
C140	IndI	2.7817	4.52767	7.62876	46.6451	61.5832	2.57623	3.70241	5.95	42.0635	54.2921
C141	IndI	3.15825		6.60565	39.8789		2.95501	3.07413	3.4361	36.0501	45.5154
C142	Ind	2.09556	5.07219	5.82576	52.8047	65.7982	3.6629	5.05407	5.63855	32.9962	47.3517
C143	IndI	2.30084	4.8789	5.45281	64.3813	77.0139	3.11507	3.92476	2.59185	34.2958	43.9275
C144	TeJ	4.18744	5.41011	2.97097	57.6248	70.1933	4.45866	4.33197	3.70964	51.3546	63.8548
C145	IndI						4.22052	7.91895	2.41344	65.525	80.0779
C146	TeJ						3.04632	6.20536	2.63219	40.8353	52.7192
C147	IndII						4.14755		0.724528	47.0153
C148	IndII	3.26901	6.32629	1.5721	59.1685	70.3359	3.48846	3.92361	0.540333	41.859	49.8114
C149	TeJ						3.49509	6.69045	2.50906	51.2725	63.9671
C150	TeJ	3.51823	7.31534	2.6806	66.7819	80.2961	3.74024	6.86891	2.33453	46.0126	58.9563
C151	IndI	3.37561	6.78377	0.709768	68.5607	79.4299	3.23835	5.47554		34.4474
C152	TeJ	2.52232	5.24277	1.6215	49.6621	59.0487	3.63563	5.18653	1.77134	39.3768	49.9703
C153	TrJ						3.52468	7.43349	2.45446	50.0983	63.5109
C154	TeJ	3.24144	7.09772	2.80454	74.9939	88.1376		6.66855	3.13072	56.8913
C155	IndI	2.03629	7.4763	3.80368	85.2534	98.5696		5.34095	2.46145	53.1696
C156	IndI							6.15373	1.24839	59.8718
C157	IndI	3.29952	7.40392	1.44367	83.3221	95.4692		5.83621	0.63316	55.3608
C158	IndI	2.09651	5.15195	0.119215	44.1286	51.4963	3.80721	5.25138		50.4107
C159	IndI						4.50397	6.43133	0.501784	35.0496	46.4867
C160	Ind	2.39879	6.4002	0.801972	41.4507	51.0516	3.99404	5.57541	0.935661	52.0449	62.55
C161	IndI	2.80595	6.82527	0.736213	77.7451	88.1126	4.40214	1.9257	1.5788	40.0825	47.9892
C162	Ind	1.76832	5.07107	1.60976	36.7281	45.1773		5.35885	1.92847	48.6763
C163	IndII	2.96816	6.66322	3.23563	69.9827	82.8497	3.90392	5.09308	3.06578	45.234	57.2968
C164	IndII						3.79035	2.80517	2.60175
C165	IndI	1.92177	4.98902	1.45651	50.5669	58.9342	2.57516	5.42056	0.351096	43.2131	51.56
C166	Ind	2.0584	4.20819	1.01649	56.9982	64.2813	4.27567	4.73662	1.47488	47.3853	57.8725
C167	Ind	2.61099	4.93782	0.944856	51.5387	60.0324	2.63036	4.21673	0.705482	42.7812	50.3338
C168	Ind	2.9389	5.05837	1.20261	53.8718	63.0716	2.67073	4.85688	0.47429	34.3148	42.3167
C169	Ind	1.54554	4.42807	1.84649	47.4743	55.2944	1.90353	5.40809	2.88027	51.6386	61.8305
C170	IndI	2.89716	5.6749	1.0702	63.8982	73.5405	4.23226	6.42435	0.739649	38.0876	49.4838
C171	TeJ	2.71051	6.28775	3.80276	73.7346	86.5356	1.40624	5.07493	0.665951	43.8577	51.0048
C172	TeJ	2.17661	5.43847	1.61608	48.5052	57.7363	3.09116	6.72784	2.34414	44.9833	57.1464
C173	IndI	1.98649	6.17046	0.886984	56.6552	65.6992	3.19286	5.51698	1.06632	36.3582	46.1344
C174	IndII	1.47503	5.01202	0.977283	53.0367	60.5011	2.57597	6.72355	0.947612	31.3753	41.6224
C175	Ind	2.34102	3.95216	4.24625	63.7362	74.2757	2.37564	4.15367	1.3737	34.9769	42.8799
C176	Ind	2.92401	5.59825	3.52398	57.9471	69.9933	3.85362	5.574	4.31918	58.6419	72.3887
C177	TeJ	2.32854	5.40959	0.568192	45.8475	54.1538	2.0905	5.95633	1.49651	51.4391	60.9824
C178	IndI	2.45704	6.57937	0.912117	50.4947	60.4432
C179	Jap						3.10368	7.19683	2.05275	25.9325	38.2858
C180	IndI	2.39461	7.29217	2.69925	59.5531	71.9392	4.56539	3.16334	0.46912
C181	TeJ						0.469022	4.53311		42.4916
C182	IndI	3.16974	7.41037	5.01665	82.584	98.1808	2.72783	4.84392	3.60904	31.9075	43.0883
C183	IndI
C184	IndI	2.28789	5.9919	4.29351	58.9871	71.5604	4.07737	2.43254	2.29389	30.4752	39.279
C185	Jap						6.46701	5.50432	0.829907	33.9724	46.7736
C186	TrJ	3.00529	5.1675	2.45919	49.6481	60.2801	3.46954	6.33528		33.5457
C187	TeJ						5.14554	6.7573	4.09128	54.0327	70.0269
C188	TeJ	3.70305	6.2727	4.07408	52.9098	66.9596	4.48296	3.64893	2.04616	23.309	33.4871
C189	TeJ	2.7227	8.10871	1.93426	50.1827	62.9483	3.41235	5.26974	2.78007	50.2212	61.6833
C190	IndI	1.55173	5.99308	3.70559	51.0808	62.3312	1.23294	4.30655	5.07823	43.7064	54.3241
C191	IndI	2.15093	5.68754	1.91931	55.5209	65.2786	2.50733	4.84576		40.9432
C192	Ind	3.02701	6.41639	4.08688	45.5075	59.0378	2.58455	4.68584	4.02098	62.62	73.9114
C193	IndI	2.82631	7.97213	2.24225	83.4527	96.4934	2.41663	3.72896	0.488647	35.5574	42.1916
C194	Ind	2.95255	4.44201	3.43623	46.0304	56.8612	2.54752	6.23734	1.83631	28.4008	39.022
C195	TeJ	3.32112	3.48737	3.19024	71.154	81.1528	4.44716	6.86266	2.88935	39.6281	53.8273
C196	TeJ						4.44011	3.47136	2.70106	41.5405	52.153
C197	IndI	2.84467	5.29165	2.04179	61.2947	71.4728	0.92873	3.82332	0.153074	35.4191	40.3242
C198	IndI	2.24591	6.31628	3.92179	52.3815	64.8655	4.57175	3.60687	3.18316	42.1882	53.55
C199	IndI	2.53492	3.24715	5.0982	44.8984	55.7786	2.41669	6.48095	4.70848	37.1393	50.7454
C200	IndI	3.20339	5.57055	6.3074	55.8022	70.8835	2.63439	3.59902	4.89632	48.5932	59.7229
C201	Ind	3.12461	6.12144	6.62468	43.5407	59.4114	2.61106	5.08974	4.2965	56.0315	68.0289
C202	IndI	1.74795	6.30358	4.6299	48.1746	60.8561	2.42434	4.29472	3.25042	33.2296	43.1991
C203	IndI							5.60894	3.52906	46.2285
W001	IndI						1.40098	3.82496	0.0766804	40.1847	45.4873
W002	TrJ	2.32566	5.43397	1.72353	47.5967	57.0798	2.76275	4.68081	1.27705	45.9558	54.6764
W003	TrJ	2.77864	6.31407	1.92563	58.9597	69.9781	4.3644	4.30744	1.16881	41.2148	51.0554
W004	TrJ						5.14537	5.96228	2.96668	43.0254	57.0997
W005	TrJ	3.18396	5.6561	2.45047	60.9302	72.2207	3.16815	7.57721	1.8442	40.5318	53.1214
W006	TrJ	2.9308	5.20029	3.83443	66.0656	78.0311	1.95446	6.30659	1.56067	42.4522	52.2739
W007	TrJ	3.63659	4.19102	2.56988	69.8338	80.2313	3.2014	6.85447	2.1823	59.6147	71.8528
W008	TrJ	4.15809	8.0602	2.68745	54.9569	69.8627	3.65437	6.89425	2.7226	46.1511	59.4224
W009	Ind	1.51445	6.80907	2.18007	55.3139	65.8175	2.97745	6.39925	3.62862	50.8858	63.8911
W010	Jap	2.52768		2.24374	50.3412		4.76283	5.93602	2.16824	55.7429	68.61
W011	TeJ	2.97643	5.8902	1.56593	43.0495	53.4821	5.78454	6.89137	2.14107	57.5446	72.3615
W012	TeJ	2.58432	6.4438	2.44239	43.612	55.0825		10.5345	1.7964	51.8024
W013	TeJ						4.12487	8.51208	1.96081	61.5328	76.1306
W014	VI	3.0074	6.65503	3.34382	56.296	69.3022	3.95499	6.41157	1.82623	38.7718	50.9646
W015	Aus						2.02536	3.0034	1.07225	35.7297	41.8307
W016	TeJ	1.97488	6.36864	3.16882	56.9107	68.4231		5.88413	1.91135	48.585
W017	TrJ	3.32448	6.90288	2.96301	51.7404	64.9307	3.56378	6.39247	3.98903	43.2585	57.2037
W018	TeJ							5.33622	0.137199	66.9938
W019	Jap	2.69045	6.77595	4.03561	61.075	74.577	3.44756	6.29642	2.55719	42.7893	55.0904
W020	Aus						4.35821	5.30893	1.62374	36.0446	47.3355
W021	Jap	5.17933	7.38497	2.63261	63.7958	78.9927	2.93068	5.9868	0.727425	30.1998	39.8447
W022	TrJ	3.62701	5.23167	4.34544	60.527	73.7312	3.361	5.55836	4.44609	43.8332	57.1987
W023	Ind	3.82757	5.88225	3.06744	59.0783	71.8555	2.76349	5.54322	2.85107	49.311	60.4688
W024	TrJ	3.18191	5.68849	2.36159	39.222	50.454	3.31022	6.89221	4.62175	47.296	62.1202
W025	Aus						3.54132	5.9424	1.09776	41.649	52.2305
W026	IndI	4.01688	6.44943	1.43704	76.3811	88.2845	3.50798	5.67065	0.808221	35.5991	45.586
W027	TeJ	2.40072	4.23117	1.76739	65.1979	73.5972	4.16963	3.32457	1.47533	40.5348	49.5043
W028	Aus						2.68098	5.14546	1.64656	45.1385	54.6115
W029	IndI	1.86976	5.17813	3.2276	62.881	73.1565	3.20225	4.93136	3.88048	58.4342	70.4483
W030	Ind	4.32269	6.08328	3.76847	71.9139	86.0883	2.24006	6.31104	1.71722	40.843	51.1113
W031	IndI	1.75676	5.16102	1.89711	42.1137	50.9286	1.87007	5.31	1.62882	41.6025	50.4113
W032	IndI	2.19034	5.5668	2.22411	40.8805	50.8617	3.2311	4.60536	1.30939	40.1722	49.318
W033	IndI	1.3634	5.77751	1.41626	48.5854	57.1425	3.05656	6.65049	2.25192
W034	Aus	1.04224	4.93077	2.05221	48.0899	56.1151	3.07298	5.3458	1.5215	49.791	59.7313
W035	Ind	2.52182	6.20246	3.52706	59.8497	72.1011	2.38505	6.59726	2.64547	43.2385	54.8663
W036	IndI	4.14337	6.58539	5.12018	85.9704	101.819	3.28185	5.73618	1.7542	43.467	54.2392
W037	Admix	4.17421	6.94262	2.88168	79.391	93.3895	3.1982	3.82137	0.987754	48.8189	56.8263
W038	TeJ	4.30774	5.74093	3.81682	69.4543	83.3198	2.64699	5.24477	2.0074	42.6215	52.5207
W039	IndI	3.4464	5.52769	2.54426	79.9399	91.4582	2.66056	3.77827	1.09047	39.791	47.3203
W040	IndII	3.98666	5.65153	5.83713	79.3546	94.8299	4.28477	6.05391	3.72168	51.6326	65.693
W041	TrJ						1.69953	4.75151	2.124	54.8809	63.4559
W042	Admix	3.23708	5.59149	4.66547	46.6752	60.1692	4.06301	6.03205	3.80327	55.7944	69.6927
W043	IndII	3.06573	5.87343	2.30452	54.4697	65.7133	2.39037	4.77817	2.57497	49.1222	58.8657
W044	IndII	3.55026	5.91277	3.37359	80.1623	92.9989	2.79924	5.58823	0.96413	38.4589	47.8105
W045	TeJ							6.33261	2.28446	49.3259
W046	IndII	2.95589	5.65164	2.68172	62.4801	73.7693	2.93319	6.05838	0.316684	37.6006	46.9089
W047	Jap	2.11408	5.68313	2.95663	53.8096	64.5635	3.15361	6.14741	2.199	40.5027	52.0028
W048	Aus	1.59194	5.57773	2.95144	59.2508	69.3719	3.00764	5.4528		33.5291
W049	Aus						3.24183	3.86948	1.72734	33.9337	42.7724
W050	VI						3.95032	5.21555	2.05221	56.4458	67.6639
W051	IndII	1.88729	4.74179	2.00845	42.3117	50.9493		4.59913	1.09367	41.1717
W052	TeJ	3.45561		3.55779	62.366		3.48641	5.19894	1.45074	54.3875	64.5236
W053	TrJ	2.92709	5.27913	2.55434	51.0002	61.7607	3.36885	5.639	1.60956	44.843	55.4604
W054	Ind						4.22015	6.02731	1.63626	36.9131	48.7968
W055	Admix	1.99846	6.00145	1.55545	44.5154	54.0708	2.41473	4.96203	0.458959	31.5092	39.345
W056	TeJ						3.24235	5.89471	2.17998	44.3099	55.627
W057	TrJ						3.26104	5.74665	2.2522	51.3838	62.6437
W058	IndI						4.30296	4.17251	1.33272	43.7	53.5081
W059	TeJ	3.65497	5.96709	2.39924	53.1532	65.1746	4.29212	3.77551		40.8472
W060	TeJ	2.87498	6.42294	2.63774	63.737	75.6727	4.67091		2.57461	67.7848
W061	Jap	3.6614	5.67748	2.39276	82.8443	94.5759	3.28851	6.21686	2.61334	50.1561	62.2748
W062	TrJ	6.38176	5.47643	2.35053	66.4218	80.6305	4.8991	4.12368	0.464738	45.2823	54.7698
W063	Jap	2.78948	5.78695	2.22048	51.1953	61.9922	4.28182	6.86858	2.47456	43.2208	56.8458
W064	TeJ							5.93759	2.4617	48.0432
W065	TrJ	3.39438	6.20018	4.56665	79.1017	93.2629	2.07527	4.63526	1.74476	37.2899	45.7452
W066	IndII	2.74398	6.57484	2.71605	80.2391	92.274	3.64203	6.51488	1.86351	52.4326	64.453
W067	TrJ	2.61801	6.50321	2.72111	68.1642	80.0065	1.67032	6.84587	2.36546	53.0743	63.9559
W068	TeJ	3.15202	7.48596	5.21092	78.0824	93.9313	4.8159	4.73008	2.85899	43.915	56.32
W069	Aus						3.49728	5.60765	1.98262	45.6607	56.7482
W070	Ind	3.79033	5.31177	2.05322	58.6301	69.7854	2.71195	4.47376	2.03299	40.5911	49.8098
W071	Ind							5.48507	2.5712	41.6347
W072	Aus	1.27575	4.19368	2.45453	40.7245	48.6484	2.76045	4.61421	1.50499	42.8848	51.7644
W073	IndII	3.60666	6.39377	5.99766	85.0671	101.065	3.73196	4.74356	1.74114	37.8644	48.081
W074	Ind	4.22416	5.73653	4.62275	58.9697	73.5532	3.50125	2.65357	3.67657	52.6969	62.5283
W075	Ind	3.27661	6.26361	3.57585	74.1758	87.2918	2.70332	4.54985	1.19073	41.3272	49.7711
W076	Aus						2.87327	5.48942	1.18512	43.4781	53.0259
W077	VI						3.49248		2.62653	47.9634
W078	IndII	4.25964	6.12256	4.609	60.0251	75.0163	2.92284	6.22064	4.20434	63.182	76.5298
W079	Admix	3.64349	6.49391	1.47603	54.5666	66.18	2.76321	5.82594	1.22834	36.6121	46.4296
W080	IndI	4.21874	5.93353	2.07257	61.9118	74.1366	4.0899	3.34508	0.867489	41.2186	49.5211
W081	VI	3.30218	6.67005	2.76314	75.2812	88.0166	3.16251	8.03697	1.83317	45.3664	58.399
W082	TeJ						4.45394	7.62653	1.01928	44.8892	57.9889
W083	IndII	2.90018	6.22929	2.45257	57.4132	68.9953	2.73972	5.18227	2.03596	50.5635	60.5214
W084	IndII	2.27598	6.92657	1.90937	78.0338	89.1457	3.34802	5.03737	1.74012	52.7399	62.8654
W085	Ind	4.23097	5.4523	2.74114	61.5382	73.9627	3.59693	4.0715	2.54126	31.1283	41.338
W086	IndII	3.46317	4.29515	0.587058	62.5316	70.877	4.36805	5.34829	0.564555	42.1501	52.431
W087	IndI							6.10643	1.4139	54.468
W088	TeJ							6.15631	2.46173	57.2146
W089	Ind	3.55322	7.42385	4.24713	87.0561	102.28	4.1477	4.3095	1.98114	38.4275	48.8658
W090	Aus	2.08458	5.68003	5.93687	61.124	74.8255	2.52089	3.73362	6.60749	46.6156	59.4776
W091	Aus		5.91075	5.7637	74.2042		2.54575	3.72703	3.18169	47.6492	57.1037
W092	Aus	1.4768	6.18337	3.92769	65.3339	76.9218	2.11918	3.93895	1.69193	28.457	36.2071
W093	Ind						4.02099	5.35461	2.19761	33.3382	44.9114
W094	Aus	1.17272	7.96268	5.61038	72.7817	87.5275	1.53788	6.04373	1.42785	45.6269	54.6364
W095	Aus						1.86632	4.54393	3.33943	37.118	46.8677
W096	Aus						1.16608	5.05951	2.76785	42.1341	51.1276
W097	Admix						2.5232	5.53318	3.22172	41.1407	52.4188
W098	Aus	1.9367	6.51847	5.26923	57.1411	70.8655	2.33819	3.89914	3.80476	37.9549	47.997
W099	Aus						1.58303	5.93085	1.9281	33.938	43.38
W100	Aus	1.72509	5.6477	5.42801	41.8672	54.668	0.581272	3.45685	4.84878	37.0657	45.9526
W101	Ind	2.64801	5.18335	7.45908	71.2594	86.5499	3.26771	5.4044	1.88124	38.455	49.0083
W102	TrJ	2.97975	5.75213	2.72106	62.1355	73.5885	1.9259	5.09644	2.43985	48.9783	58.4405
W103	Aus						2.45247	4.85201	1.42687	41.8981	50.6295
W104	Aus	1.4199	7.29298	5.00989	69.202	82.9247	2.74518	4.01853	2.29661	39.6733	48.7336
W105	Aus	1.61767	5.67075	4.05771	59.9628	71.3089	2.21021	4.49229	3.00211	40.3623	50.067
W106	Aus	2.76213	5.72203	7.01675	65.6504	81.1514	1.64263	3.10165	5.30319	33.4431	43.4905
W107	Admix						1.57346	2.72849	1.6955	45.3732	51.3706
W108	Aus						2.24773	3.94203	4.29986	45.2289	55.7185
W109	TeJ							4.68373	0.637568	41.3941
W110	TrJ						4.0755	4.9232	0.683739	34.7062	44.3887
W111	Ind	1.97118	6.0566	4.24297	59.5572	71.828	2.41702	6.43592	5.64998	49.1136	63.6165
W112	Ind						2.03551	5.39671	3.15512	42.8212	53.4085
W113	TrJ						3.20904	5.08146	2.18613	38.5874	49.064
W114	Ind	1.71149	5.87971	3.38076	53.7666	64.7385	4.31389	4.51685	4.687	54.7163	68.234
W115	Aus	1.64523	6.02471	4.82721	49.7171	62.2142	2.65981	5.21428	4.34131	41.9529	54.1683
W116	TrJ						2.86751	6.68176	3.83447	53.8101	67.1939
W117	TeJ							5.42529	1.43881	51.2401
W118	TrJ	2.31758	6.33333	2.88225	73.0516	84.5848	3.5736	4.95982	1.721	52.8282	63.0826
W119	TrJ	2.24822	6.32099	2.77431	60.3323	71.6758	3.00687	6.04549	2.80222	66.5625	78.4171
W120	TeJ	1.69282	6.69175	3.39381	66.2455	78.0239	3.40563	6.02423	2.42522	54.0991	65.9542
W121	Aus	1.93277	6.01748	3.64101	65.0053	76.5965	3.07798	4.56353	1.3012	34.2717	43.2144
W122	Jap
W123	TrJ	2.38109	5.52682	4.35579	57.2265	69.4902	2.95338	6.34449	3.55935	53.2133	66.0705
W124	IndI						1.76887	4.30192	2.1701	48.977	57.2178
W125	Admix						3.38902	5.61269	1.88045	29.8498	40.732
W126	IndI	3.87904	6.75123	3.81297	69.4249	83.8681	3.68906	2.97831	0.479888	33.588	40.7353
W127	Jap	3.52262	5.91961	3.45711	57.5106	70.4099	3.93281	6.5798	2.56505	40.9616	54.0393
W128	Admix	2.1857	6.46946	3.55114	60.0382	72.2445	3.61386	4.45662	2.4844	45.3029	55.8578
W129	VI	2.46246	7.00522	1.7806	54.0207	65.269	3.02724	4.83794	1.92591	41.8354	51.6265
W130	TeJ	2.64925	6.30062	2.17649	66.486	77.6123		5.26512	1.43577	51.6903
W131	Aus	1.848		2.33337	45.4691		1.83362	4.99577	2.03482	45.6908	54.555
W132	IndI	2.05363	5.62585	3.66256	65.3577	76.6998	2.88705	5.02328	2.05513	34.186	44.1515
W133	Ind	2.36848	5.69138	3.35917	58.8007	70.2197	1.31679	5.35359	1.03975	44.5235	52.2336
W134	Aus	2.4544	5.21509	3.02174	65.048	75.7392	3.3155	3.5997	1.60772	51.6346	60.1575
W135	Admix						2.76397	4.97196	3.60997	52.4182	63.7641
W136	VI	4.48277		3.22672	68.5416		3.31827	6.50174	3.54663	57.9681	71.3347
W137	Ind	1.56749	6.03021	2.55739	57.7098	67.8649	1.85943	5.50905	2.56172	42.2007	52.1309
W138	IndI	3.19946	7.88846	3.29896	76.4433	90.8301	3.13253	5.32961	1.06998	43.7588	53.291
W139	TeJ							5.4202	2.06357	45.8564
W140	Aus	2.67396	5.70025	4.47984	67.2253	80.0793	3.02398	5.40507	2.16882	34.0273	44.6252
W141	Aus						2.63438	4.11967	3.12944	36.3986	46.2821
W142	Aus						2.22023	4.34372		38.6874
W143	Jap	1.63603	4.96535	2.01386	48.5291	57.1443	2.35003	5.01598	3.40117	40.6915	51.4586
W144	IndI	1.56349	4.49009	0.942957	45.4159	52.4124	2.54671	4.04828	0.903838	41.1816	48.6804
W145	Ind	1.89306	6.00893	2.01689	56.7199	66.6388	3.25651	5.53947	0.555622	36.6248	45.9764
W146	IndI						2.89274	4.8545	1.78004	38.0126	47.5399
W147	Ind	2.86897	5.16557	3.34132	51.5981	62.974	3.28217	4.70663	0.83489	45.8762	54.6999
W148	Ind	2.11785	5.1777	2.16565	60.3462	69.8074	2.47173			33.9243
W149	IndII						4.24288	4.51459	0.790062	38.092	47.6396
W150	IndII	3.54705	7.26062	4.208	49.7534	64.7691	3.8587	7.06301	4.62551	52.1128	67.66
W151	IndII	2.73368	5.28915	0.822497	41.7287	50.574	3.74703	5.5667	1.16519	37.3151	47.7941
W152	IndII						3.96449	5.38243	1.29827	42.961	53.6062
W153	IndII	2.60222	4.61239	2.05466	60.9564	70.2257	3.51666	6.09551	0.365513	43.9909	53.9686
W154	IndII	3.09546	5.69892	1.88438	55.9876	66.6664	2.58866	4.4865	0.749856	33.2926	41.1176
W155	Ind	2.84565	7.42722	2.94866	66.4609	79.6824	2.9471	5.69043	0.478461	36.1861	45.302
W156	Ind	0.903629	5.87855	1.22458	49.55	57.5567	2.33842	4.68824	0.19232	38.0399	45.2588
W157	Ind	0.953008	5.66104	2.59098	58.6317	67.8368	2.57346	5.42142	1.5689	42.867	52.4308
W158	Admix	1.79228	6.7906	3.6245	54.5408	66.7482	3.8783	5.05543	2.39861	29.3023	40.6347
W159	IndII	3.07892	7.46777	3.58861	66.7484	80.8837	4.32372	5.62555	1.74573	33.2269	44.9219
W160	TeJ						4.38596	6.04161	1.60984	37.8076	49.845
W161	IndII	2.61221	4.9994	0.635669	53.5633	61.8106	2.9491	6.34133	0.301211	40.7449	50.3366
W162	TeJ						2.41075	6.6349	2.34236	45.8026	57.1906
W163	Ind	2.80973	7.27973	2.24124	69.399	81.7297	3.71414	6.17919	1.05219	49.276	60.2215
W164	Ind						3.29784	6.23015	1.14269	43.4053	54.0759
W165	Ind	3.54137	6.66234	2.45245	65.2904	77.9466	3.65324	5.69335	0.68524	40.515	50.5468
W166	Ind	2.24969	4.6106	1.67508	56.0745	64.6099	4.21126	5.38957	1.32347	43.9977	54.922
W167	Ind						3.40285	5.10191	1.42933	44.5654	54.4995
W168	IndII	2.50048		1.96813	43.0446		3.50325	6.1871	3.83152	38.0426	51.5645
W169	IndII						1.60436	4.91055	2.33018	52.3866	61.2317
W170	IndII	2.3279	4.14295	1.97076	48.8086	57.2502	3.63431	5.38571	2.45339	43.6875	55.1609
W171	IndII						2.23964	5.07198	3.02931	42.2642	52.6051
W172	IndII	2.38503	5.55989	1.26246	54.575	63.7824	3.7438	4.03759	1.07586	60.8934	69.7507
W173	TrJ	2.33898	5.27933	1.93886	75.3027	84.8598	3.42326	5.37534	1.54814	39.9719	50.3187
W174	IndII	3.71811	6.48254	2.48887	59.9385	72.628	3.91191	5.59116	1.83114	47.7009	59.0351
W175	Admix	2.4626	4.72765	2.76315	47.6691	57.6225	2.72109	6.28939	3.13944	50.3744	62.5243
W176	IndII	2.50423	4.94339	2.27729	51.754	61.4789	2.75412	7.48643	1.16312	47.064	58.4677
W177	IndII	3.60783	6.38898	1.9502	51.1458	63.0928	3.26643	6.86393	3.20411	40.6845	54.019
W178	IndII	4.01907	5.97124	3.17936	54.1428	67.3125	3.38935	6.19773	2.56271	51.202	63.3518
W179	IndII	2.60602	6.38671	2.96997	57.7634	69.7261	3.28753	3.59544	1.04498	40.1289	48.0568
W180	IndII	3.36843	8.22254	2.29777	64.5446	78.4334	3.88816	5.2812	3.05636	48.685	60.9107
W181	IndII	3.42921	5.93878	2.16964	58.3655	69.9031	3.16169	4.85939	1.14132	43.6964	52.8588
W182	IndII	3.20847	5.31038	2.47051	55.4226	66.4119	3.68735	5.52157	2.54466	49.1998	60.9534
W183	IndII						2.43981		1.74176	33.4072
W184	IndII	3.09005	7.27084	3.95963	63.821	78.1415	2.92283	5.06058	3.22214	62.9956	74.2011
W185	IndII	3.40263	6.54337	2.92294	61.5057	74.3746	3.22203	6.4884	4.69691	42.0253	56.4326
W186	Ind	3.07881	5.8196	0.810208	44.9059	54.6145	2.55542	5.17242	1.16246	38.6025	47.4928
W187	Ind						3.12999	5.78589	0.0853504	36.5716	45.5728
W188	IndII						2.9241	5.84797	2.54883	34.5408	45.8617
W189	IndII	3.24117	6.35155	2.4721	47.5016	59.5665	3.33997	4.93573	3.03424	49.2994	60.6093
W191	Admix	4.02992	6.4847	2.62222	58.9794	72.1163	3.91553	7.14252	1.72954	43.8184	56.606
W192	Admix						3.77814	6.6922	1.88128	35.343	47.6947
W193	TeJ	1.8915	4.6549	1.45705	43.0434	51.0469	3.6072	5.31095	1.20802	44.7594	54.8856
W194	IndII	3.5406	5.08482	3.78736	52.0366	64.4494	4.28315	5.14535		40.3186
W195	IndII	3.55663	6.48474	2.49498	47.2342	59.7706	3.93241	5.70807	1.69793	43.8727	55.2111
W197	IndII						3.14451	5.44505	3.15618	48.3523	60.0981
W198	IndI						4.67151	5.86083	1.50481	27.3372	39.3743
W199	Ind						3.48928	6.82072	1.21198	46.331	57.853
W200	IndII	3.20653	5.39938	3.00426	82.1192	93.7294	3.91775	6.24388	1.64821	47.5903	59.4001
W201	IndII	3.22954	6.25614	2.50751	62.9066	74.8998	3.73651	6.35109	1.08065	49.7808	60.9491
W202	IndII	3.8183	6.39581	2.38657	69.6313	82.232	2.88172	6.188	0.818451	38.9813	48.8695
W203	Ind	1.69024	5.13399	2.08954	56.2202	65.134	2.56058	6.3098	0.470466	33.9744	43.3153
W204	IndI	3.09092		1.54586	61.5244		3.0739	4.10517	1.13391	38.5695	46.8824
W205	IndI	2.73052	5.26594	1.33881	53.9784	63.3136	2.85007	4.35897	1.42678	36.7475	45.3834
W206	Ind	2.80803	6.15687	2.94408	56.5184	68.4274	3.72228	4.86752	3.55793	54.4813	66.629
W207	TeJ						3.60891	5.41547	1.45198	41.8146	52.291
W208	TeJ	3.2411	5.54525	2.45503	59.8915	71.1329	2.82277	5.41074	1.49262	47.1554	56.8815
W209	TeJ	3.45313	6.80249	2.73077	65.1026	78.089	2.71469	6.64959	0.538784	46.7979	56.7009
W210	IndI						2.47978	4.92901		38.3123
W211	IndII	2.95875	7.22589	4.26658	77.0498	91.501	2.3578	4.80255	1.93575	39.9421	49.0382
W212	Ind	2.9372	5.98209	1.8514	51.8711	62.6418	4.64641	5.40552	1.59505	34.5905	46.2374
W213	IndII	3.30176	6.76646	4.68094	61.3873	76.1365	3.28302	6.82897	3.10259	48.4427	61.6573
W214	Aus						2.37644	4.05196	0.922338	36.1362	43.487
W215	Aus						3.33449	4.60157	0.719704	38.0962	46.7519
W216	IndII	2.98403	5.37854	3.31319	60.9507	72.6265	3.12217	5.85613	2.79965	44.1451	55.9231
W217	IndII	3.74155	6.43438	2.9218	51.9986	65.0964	2.70538	8.02688	2.56797	49.5512	62.8515
W218	IndII	3.35761	6.08367	3.66939	57.2786	70.3893	3.56692	7.43519	3.878	52.1354	67.0155
W219	VI						3.39871	8.68715	3.29826	54.2192	69.6033
W220	VI	3.20675	6.40824	2.24364	55.9512	67.8099	3.23713	7.70154	0.299679	33.9679	45.2062
W221	IndII	2.65008	5.56866	2.34471	62.7765	73.3399	3.76935	5.54496	2.98411	45.7391	58.0375
W222	IndII	2.65669	5.28985	1.50117	58.9503	68.398	2.50586	5.53219	0.298139	36.6211	44.9573
W223	IndII						2.51999	4.8612	0.732826	41.8198	49.9338
W224	IndII	2.87829	6.13818	1.59944	54.2091	64.825	3.20205	4.57075	0.512552	41.4364	49.7218
W225	TrJ						2.99495	6.15542	0.805785	43.0668	53.023
W226	Jap						4.05253	4.91783	2.73047	46.2458	57.9467
W227	IndII	2.55084	5.13351	1.747	49.9184	59.3497	3.42489	3.83622	1.90204	29.4767	38.6399
W228	IndII	3.01272	5.51307	2.57971	56.483	67.5885	2.99252	5.11005	0.662806	32.6874	41.4528
W229	IndII	2.71684	6.86722	1.67106	56.4681	67.7233	4.40401	6.80456	0.900846	37.1371	49.2465
W230	IndII	3.08753	5.78348	3.1205	69.7315	81.7231	3.39602	5.42956	2.06096	52.2754	63.162
W231	IndII						3.38879	4.8372	1.07315	45.8346	55.1338
W233	Ind	2.44513	4.11681	1.88989	41.8651	50.3169	3.67211	4.94752	2.41589	42.1678	53.2033
W234	Ind	3.384	6.39337	3.06358	54.6368	67.4777	3.49279	4.38476	2.04026
W235	IndI	3.11863	6.44018	5.86739	45.0261	60.4523	1.72699	3.60151	3.52492	27.2904	36.1438
W236	IndII	3.43025	6.53488	1.56938	59.0628	70.5973	3.06464	4.85144	1.49248	38.166	47.5746
W237	IndII	3.21521	6.03242	0.854699	60.1758	70.2781	2.77439	4.65398	1.70113	35.1856	44.3151
W238	IndII	3.66629	6.29157	1.95192	64.9035	76.8133	3.66502	5.81057	2.76231
W239	IndII	3.14378	6.10449	1.12598	64.2969	74.6711	3.10667	5.66143	1.13965	51.1303	61.038
W240	Ind	3.37734	5.55828	1.55885	60.5363	71.0307	3.21308	5.08232	1.08493	49.4476	58.828
W241	IndII	2.85087	5.82761	0.630731	50.5408	59.8501	3.471	5.4764	1.18141	39.2507	49.3795
W242	IndII	3.06891	6.42593	2.1885	60.0688	71.7522	2.93602	6.61223	1.34888	41.098	51.9951
W243	IndII	3.53421	5.96169	1.31898	57.2038	68.0187	2.87946	5.84689	1.78613	45.2002	55.7127
W244	IndII	3.67938	5.69732	1.82904	66.7625	77.9682	3.35511	5.47035	1.09111	37.9679	47.8844
W245	IndII						3.28927	3.18495	3.07807	30.1863	39.7386
W246	Ind	2.20317	5.82662	2.32441	42.0225	52.3767	2.57538	4.75625	2.80131	45.2569	55.3898
W247	IndI	3.09364	6.28193	1.25422	65.0282	75.658	3.56541	4.57421	1.08946	39.7218	48.9508
W248	IndI	2.9831	7.35685	2.66504	74.3623	87.3673	3.43705	5.16682	2.05076	35.054	45.7087
W249	TeJ	3.66392	4.91736	2.18333	55.7622	66.5268	3.04656	5.55414	2.46339	47.4959	58.56
W250	TeJ	2.35066	4.6569	2.62752	60.5524	70.1875	3.57906	7.05217	1.93594	40.6543	53.2215
W251	TrJ						4.05214	5.60012	2.49999	48.3432	60.4954
W252	VI						3.15105	5.79687	1.14486	41.8256	51.9184
W253	TrJ	1.96658	6.64692	2.9102	77.7605	89.2842	3.42981	5.85966	1.56257	38.2092	49.0612
W254	TrJ	2.77501	6.07641	3.0023	81.9249	93.7786	3.44016	6.89548	2.46542	37.7367	50.5377
W255	VI	2.82927	4.32616	2.71291	67.0421	76.9104	2.65132	4.16282	1.95473	46.964	55.7329
W256	VI	3.09968	4.8071	1.43884	50.5623	59.9079	3.86575	6.36727	1.81125	44.3649	56.4092
W257	TrJ	2.91781	3.1822	1.56815	42.4507	50.1189	3.15463	5.60686	2.07903	36.6898	47.5303
W258	VI	1.92175	5.17903	1.77759	69.5047	78.383	4.23576	5.44923	2.45057	33.7511	45.8866
W259	IndII	3.67609	5.63824	1.71763	66.5113	77.5432	3.93856	5.35227	0.958985	36.6647	46.9146
W260	TrJ	2.31997	4.57699	1.49812	50.0064	58.4015	2.55631	5.72919	1.7758	43.5783	53.6396
W261	Admix	4.39832	8.00254	5.74389	80.694	98.8387	4.1649	2.32993	4.45844	42.4769	53.4302
W262	IndI							5.68068	2.39286	56.3696
W263	IndII	3.57861	4.76957	1.78047	66.5463	76.6749	3.12023	5.97805	2.8164	49.3658	61.2804
W264	Ind	4.1909	6.4122	3.57655	61.0487	75.2283	3.15223	7.698	1.24017	49.36	61.4504
W265	IndII	3.99567	5.98129	1.15205	69.8582	80.9873	2.70861	5.5299	1.40689	38.5903	48.2357
W266	IndII	5.33788	5.25477	2.84318	66.3799	79.8157	4.2863	3.54959	1.9184	39.1254	48.8796
W267	Ind	3.3561	5.43995	1.34974	71.2323	81.3781	3.60787	5.90201	1.16548	35.9437	46.6191
W268	Ind	3.62889		2.65757	55.2961		2.35411	5.91423	1.63283	45.9295	55.8306
W269	Ind	2.06206	4.03004	0.116922	38.0822	44.2912	3.57909	5.24873	1.68523	38.1414	48.6544
W270	Ind						3.51089	4.93294	1.36349	43.4028	53.2101
W271	Ind	2.99045	5.72122	1.53229	72.6569	82.9009	3.39541	6.31344	0.837352	52.2318	62.778
W272	Ind	3.49034	6.01608	4.55421	64.8274	78.888	3.94243	6.03208	2.10371	41.906	53.9842
W273	TrJ	4.56265	4.40751	2.36421	83.5596	94.894	3.26817	5.48904	1.77766	55.1362	65.6711
W274	IndI								2.41382	52.8713
W275	TrJ	2.98223	5.3663	3.32309	68.1906	79.8623	3.42513	5.91866	2.07828	37.6611	49.0831
W276	Ind	2.74317	5.90835	4.4241	60.7325	73.8081	2.12958	4.98266	1.19027	37.3622	45.6647
W277	Aus	2.53589	4.24805	5.18901	72.394	84.367	2.27083	5.3953	2.4689
W278	Aus	2.42637	3.9002	4.34595	71.7721	82.4446	2.56062	4.36837	1.95958	33.5442	42.4328
W279	Aus	2.56407	5.20872	6.14741	81.4866	95.4068	1.65806	3.76018	2.82073	38.8085	47.0475
W280	Aus						2.63169	6.06481	1.62517	49.1786	59.5003
W281	TeJ						2.02295	5.8509	0.998535	38.5903	47.4627
W282	Ind	2.71285	4.18823	3.148	46.1843	56.2334	3.88592	4.83972	2.95828	44.9188	56.6027
W283	TeJ						4.79491	5.10496	1.9735	62.0069	73.8802
W284	TrJ						3.58448	6.64941	3.63498	48.5837	62.4525
W285	TrJ						3.27037	7.67528	2.98949	51.8223	65.7574
W286	Aus	2.86662	4.65099	4.26755	40.6012	52.3864	2.18345	3.78296	4.17143	28.2685	38.4063
W287	Aus	2.89425	4.08776	2.57103	60.8529	70.406	2.64721	4.47716	3.28617	50.8026	61.2131
W288	TrJ	4.18222	5.76619	3.48472	93.2733	106.706	2.78319	4.96879	2.06171	43.5118	53.3254
W289	IndII						2.29929	5.50702	3.21219	41.1114	52.1299
W290	TeJ						3.61634	4.60245	1.70623	30.2306	40.1556
W291	IndII	3.33682		3.02898	76.7143		4.80158	7.1047	1.61301	31.5741	45.0934
W292	Aus	2.59777	4.60512	6.03606	67.2356	80.4746	3.05811	4.72543	4.80648	50.3602	62.9503
W293	IndII	3.09283	4.71985	1.0339	58.4254	67.272	4.05882	6.00865	1.32839	37.5083	48.9042
W294	Admix	3.3963	3.63664	1.77036	41.1194	49.9227	2.68114	6.94022	2.80818	39.9448	52.3743
W295	IndII	2.4578	5.74763	3.38926	78.0943	89.689	2.50054	5.57753	2.90844	40.8286	51.8151
W296	Aus	2.58231	6.33021	2.69232	64.9882	76.5931	2.4231	4.69629	1.23781	40.873	49.2302
W297	Aus						1.772	5.35318	1.69583	44.5472	53.3682
W298	IndII	3.73741	6.60621	3.82249	74.4565	88.6226	3.13848	8.14869	3.62297	49.286	64.1962
W299	Ind	4.0044	7.19931	1.64547	90.7143	103.563	3.36939	3.87614	0.544919	39.5913	47.3818
W300	TrJ	2.88583	5.8554	2.37955	52.6316	63.7523	3.54107	6.38564	2.12096	46.8063	58.8539
W301	IndII	2.79197	6.99282	2.89412	70.2805	82.9594	4.34688	5.97947	2.15235	39.9105	52.3892
W302	TrJ	4.14762	6.75777	2.0838	64.4058	77.395	4.73905	7.56551	2.94668	45.9652	61.2164
W303	TrJ						3.22344	4.83161	1.45984	34.6145	44.1294
W304	Admix	3.54261	6.94843	1.02795	59.1295	70.6485	4.15092	6.29707	0.856776	45.2021	56.5068
W305	TeJ						3.55883	6.43766	1.51066
W306	VI	4.5262	7.45963	2.44737	87.4296	101.863	4.57944	6.67236	3.59548	56.023	70.8703
W307	IndII	3.37058	6.22302	2.92286	70.4733	82.9897	2.53041	5.3338	2.21814	56.8243	66.9067
W308	IndII	3.74198	6.04146	1.62457	60.8121	72.2201	2.50894	5.24022	2.17725	45.1998	55.1262
W309	IndII	2.3175	6.18588	0.936541	47.1591	56.599	2.0805		2.0339	50.2676
W310	IndII	3.31353	6.5254	1.57274	62.2173	73.629	2.93711	4.63738	2.30468	47.1262	57.0054
W311	IndII	2.96418	5.74023	1.27757	73.0869	83.0689	3.01853	5.31548	1.61393	48.3877	58.3357
W312	IndII	2.93667	6.3053	3.25901	77.0343	89.5353	2.80839	6.66533	1.31128	33.0639	43.8489
W313	IndII	3.17888	7.02415	3.02316	75.854	89.0802	2.88401	5.59645	1.92094	42.3607	52.7621
W314	IndII	3.28906	7.54275	4.23265	76.2554	91.3198	3.72259	5.79237	1.96538	47.4379	58.9183
W315	IndII	1.16172	6.05199	3.03368	52.2159	62.4633	2.86435	5.56936	2.48016	45.7372	56.651
W316	IndII						1.98008	6.47611	2.61725	49.7645	60.8379
W317	IndII	2.04207	5.9313	3.39312	59.2708	70.6373	2.91812	6.26289	2.45797	43.1095	54.7485
W318	IndI	2.91425	5.36178	4.65637	74.0263	86.9587	3.14157	4.76526	4.49863	39.2161	51.6216
W319	TeJ						5.75601	4.36467	1.58013	38.2233	49.9241
W320	Ind						5.62137	2.38713	4.5632	52.4378	65.0095
W321	Ind	3.01178	6.0308	5.26341	53.4447	67.7507	2.45219	5.32812	5.64888	44.7327	58.1619
W322	Ind	2.39869	6.36315	0.254539	45.1588	54.1751	3.6068	4.72848	1.6571	40.8331	50.8255
W323	Jap						4.59487	6.84301	3.61336	51.1311	66.1823
W324	Jap						6.03773	2.86874	1.93579	42.4771	53.3194
W325	TeJ	6.39474		3.54026	45.4214		4.30506	5.59622	2.76094	27.3859	40.0481
W326	Jap						5.52431	3.04438	1.24968	32.2189	42.0373
W327	TeJ	2.83822	6.15629	1.33411	39.9488	50.2774	4.18163	6.45971	1.64159	32.7761	45.0591
W328	Admix						4.67563	5.48902	2.51893	54.7798	67.4634
W329	TrJ	3.97402	6.15817	0.909979	48.1964	59.2385	3.9441	5.05877	0.190225	39.6948	48.8879
W330	Aus						2.79709	4.16099	3.21919	45.299	55.4763
