# Supplementary material for: Genetic Basis of Variation in Rice Seed Storage Protein (Albumin, Globulin, Prolamin, and Glutelin) Content Revealed by Genome-Wide Association Analysis
Source: Front Plant Sci. 2018 May 9;9:612. doi: 10.3389/fpls.2018.00612 (PMC5954490; doi:10.3389/fpls.2018.00612)
Supplement: Supplementary file 5 [file Table_7.xlsx]

## Sheet: RP6
Supplementary Table S7 Relative expression of RP6 in 20 accessions randomly chosen from indica subpopulation with different haplotypes
ID	Name	Subpopulation (sequence-based)	Haplotype	RQ
C021	xiangaizao10	IndI	hap2	22.2463
C044	Teqingxuanhui	IndII	hap2	119.76
C065	Hongwan1hao	Ind	hap2	40.2019
C068	Taizhongxianxuan2	IndII	hap2	242.96
C176	Chenwan3hao	Ind	hap2	228.592
C190	Xiangdao	IndI	hap2	126.575
W157	Huajingxian74	Ind	hap2	228.885
C020	Guangluai-4-1	IndI	hap3	17.0849
C022	JinnanteB	IndI	hap3	13.3381
C025	Qingsiai16B	IndII	hap3	13.9146
C037	Chengduai3hao	IndI	hap3	34.1043
C099	WH099	Ind	hap3	27.4538
C128	Liuyezhan	IndI	hap3	36.1212
C131	Xuanenchangtan	IndI	hap3	12.6675
C136	Zegu	IndI	hap3	8.53731
C164	IR661-1	IndII	hap3	22.7073
C25	Qingsiai16B	IndII	hap3	22.836
W043	Dichroa Alef Uslkij	IndII	hap3	13.6666
W148	BR24	Ind	hap3	24.3496
W182	CR203	IndII	hap3	21.4537

## Sheet: RM1
Supplementary Table S7 Relative expression of RM1 in 34 accessions randomly chosen from indica subpopulation with different haplotypes.
ID	Name	Subpopulation (sequence-based)	Haplotype	RQ
C021	xiangaizao10	IndI	hap3	33.3772
C046	Xiangwanxian3hao	Ind	hap3	32.2997
C065	Hongwan1hao	Ind	hap3	46.9706
C176	Chenwan3hao	Ind	hap3	36.3186
C190	Xiangdao	IndI	hap3	60.649
C203	Zaoxian240	IndI	hap3	21.3904
W157	Huajingxian74	Ind	hap3	46.6264
C019	Aijiaonante	IndI	hap1	7.88886
C020	Guangluai-4-1	IndI	hap1	10.9192
C022	JinnanteB	IndI	hap1	8.03243
C037	Chengduai3hao	IndI	hap1	38.6931
C040	Jiabala	IndI	hap1	35.9635
C042	Guichao2hao	Ind	hap1	5.8925
C049	Jinyou1hao	IndII	hap1	8.27133
C058	Liusha1hao	IndI	hap1	9.61249
C073	Esiniu	IndI	hap1	7.15172
C077	Benbanggu-2	IndI	hap1	18.5286
C113	Xiangzaoxian7hao	Ind	hap1	14.4834
C128	Liuyezhan	IndI	hap1	21.5324
C131	Xuanenchangtan	IndI	hap1	7.68106
C136	Zegu	IndI	hap1	9.95369
C145	Zhenshan97B	IndI	hap1	7.7092
C039	Gongju73	IndI	hap1	26.3239
C25	Qingsiai16B	IndII	hap1	25.7826
C059	Bawangbian1	IndI	hap1	13.8641
C169	Taizhongzailai1	Ind	hap1	14.421
C170	Xiangwanxian1hao	IndI	hap1	25.4095
C174	JWR221	IndII	hap1	14.0105
W040	INIAP 7	IndII	hap1	18.7039
W051	RP2151-173-1-8	IndII	hap1	10.3051
W148	BR24	Ind	hap1	42.2922
W149	93072	IndII	hap1	14.0736
W151	C418	IndII	hap1	14.132
W179	Shwe Thwe Yin Hyv	IndII	hap1	6.70572

## Sheet: 2.3 kb Wx
Supplementary Table S7 Relative expression of 2.3 kb Wx in 35 accessions randomly chosen from indica and japonica subpopulations with different haplotypes.
ID	Name	Subpopulation (sequence-based)	Haplotype	Relative expression	Alb-2015 (mg/g)	Amylose content-2015 (%)
C025	Qingsiai16B	IndII	hap2	252.361	4.3327	21.7431
C068	Taizhongxianxuan2	IndII	hap2	137.873	2.59565	15.1416
C115	WH115	IndII	hap2	135.533	4.64134	14.5729
C148	9311	IndII	hap2	88.9339	3.48846	15.1833
C164	IR661-1	IndII	hap2	363.568	3.79035
W066	IR 238	IndII	hap2	83.4823	3.64203	14.3302
W086	4484	IndII	hap2	121.442	4.36805	12.4267
W152	CDR22	IndII	hap2	242.549	3.96449
C035	Yelicanghua	TeJ	hap3	1630.86	3.83898	18.8117
C082	Gaoyangdiandao	TeJ	hap3	1590.13	4.12346	2.4528
C186	Sanbangqishiluo	TrJ	hap3	1441.24	3.46954	13.9149
W005	TAICHU MOCHI 59	TrJ	hap3	1930.57	3.16815	20.1169
W006	WC 2811	TrJ	hap3	3903.82	1.95446	18.3487
W017	R 75	TrJ	hap3	4248.69	3.56378	20.4793
C016	Laoguangtou83	TeJ	hap5	197.077
C018	AnnongwangengB-2	TeJ	hap5	350.588		17.6079
C064	Sugeng2hao	TeJ	hap5	394.158	3.39558	27.0644
C137	Cungunuo	TeJ	hap5	404.441	4.72328	3.04362
C185	HaomakeK	Jap	hap5	638.649	6.46701	3.75293
W008	Secano do Brazil	TrJ	hap5	347.78	3.65437	14.2111
C020	Guangluai-4-1	IndI	hap7	8422.25		24.4938
C039	Gongju73	IndI	hap7	9347.43	3.54643	26.2568
C042	Guichao2hao	Ind	hap7	11913.3	3.50499	24.5826
C045	Huangsiguizhan	IndII	hap7	7731.09	4.39897	25.7069
C073	Esiniu	IndI	hap7	26049.5	2.15135	17.7219
C049	Jinyou1hao	IndII	hap7	4062.48	1.84158	27.4762
C058	Liusha1hao	IndI	hap7	3167.13	3.0375	26.117
C059	Bawangbian1	IndI	hap7	19549.4	2.99593	27.2718
C077	Benbanggu-2	IndI	hap7	12403.5	2.77103	24.9961
C169	Taizhongzailai1	Ind	hap7	10258.5	1.90353	25.0193
C203	Zaoxian240	IndI	hap7	8279.7
W046	IR 9660-48-1-1-2	IndII	hap7	3687.85	2.93319	25.2081
W148	BR24	Ind	hap7	3090.83	2.47173	24.2762
W179	Shwe Thwe Yin Hyv	IndII	hap7	16470.6	3.28753	26.5043
W182	CR203	IndII	hap7	2908.29	3.68735	25.9812

## Sheet: 3.3 kb Wx
Supplementary Table S7 Relative expression of3.3 kb Wx in 37 accessions randomly chosen from indica and japonica subpopulations with different haplotypes.
ID	Name	Subpopulation (sequence-based)	Haplotype	Relative expression	Alb-2015 (mg/g)	Amylose content-2015 (%)
C044	Teqingxuanhui	IndII	hap2	139.341	2.28284	16.4809
C068	Taizhongxianxuan2	IndII	hap2	105.857	2.59565	15.1416
C115	WH115	IndII	hap2	85.7906	4.64134	14.5729
W066	IR 238	IndII	hap2	238.589	3.64203	14.3302
W086	4484	IndII	hap2	116.05	4.36805	12.4267
W152	CDR22	IndII	hap2	159.103	3.96449
W159	R644	IndII	hap2	155.118	4.32372	10.5064
C035	Yelicanghua	TeJ	hap3	5.56971	3.83898	18.8117
C082	Gaoyangdiandao	TeJ	hap3	1.63111	4.12346	2.4528
C186	Sanbangqishiluo	TrJ	hap3	6.72344	3.46954	13.9149
W005	TAICHU MOCHI 59	TrJ	hap3	1.73126	3.16815	20.1169
W006	WC 2811	TrJ	hap3	3.84245	1.95446	18.3487
W017	R 75	TrJ	hap3	1.81804	3.56378	20.4793
C016	Laoguangtou83	TeJ	hap5	22.8025
C018	AnnongwangengB-2	TeJ	hap5	20.9168		17.6079
C048	Zaoshunonghu6	TeJ	hap5	31.3214	2.80776	17.0227
C057	Dandongludao	Jap	hap5	26.5394	4.00374	14.1841
C074	cunsanli	TeJ	hap5	26.7874	5.31683	19.2316
C130	Xiangnuo-1	TeJ	hap5	22.5761	3.23702	3.16779
C196	Yuyannuo-2	TeJ	hap5	21.4125	4.44011
W003	C 5560	TrJ	hap5	32.7725	4.3644	3.79411
C006	Shan-Huang Zhan-2-1	Ind	hap7	16.3622	3.17293
C039	Gongju73	IndI	hap7	6.72005	3.54643	26.2568
C042	Guichao2hao	Ind	hap7	10.1829	3.50499	24.5826
C045	Huangsiguizhan	IndII	hap7	7.60523	4.39897	25.7069
C058	Liusha1hao	IndI	hap7	3.49806	3.0375	26.117
C059	Bawangbian1	IndI	hap7	10.6819	2.99593	27.2718
C073	Esiniu	IndI	hap7	14.8268	2.15135	17.7219
C145	Zhenshan97B	IndI	hap7	5.39513	4.22052
C168	Xugunuo	Ind	hap7	10.3717	2.67073	26.2151
C169	Taizhongzailai1	Ind	hap7	11.0951	1.90353	25.0193
C170	Xiangwanxian1hao	IndI	hap7	5.50682	4.23226	24.9493
W087	YOU-I B	IndI	hap7	8.17319		23.7647
W148	BR24	Ind	hap7	7.91754	2.47173	24.2762
W157	Huajingxian74	Ind	hap7	12.558	2.57346	26.6323
W179	Shwe Thwe Yin Hyv	IndII	hap7	5.56692	3.28753	26.5043
W182	CR203	IndII	hap7	17.9183	3.68735	25.9812
